# Supplementary material for: Regional water footprint assessment for a semi-arid basin in India
Source: PeerJ. 2022 Oct 7;10:e14207. doi: 10.7717/peerj.14207 (PMC9549886; doi:10.7717/peerj.14207)
Supplement: Supplemental Information 1 [file peerj-10-14207-s001.xlsx]

## Sheet: Crop wise WF (MCM_per_year)
Bajra	MCM	Year	WFblue (MCM)	WFgreen (MCM)	WFgrey (MCM)	Production (ton)		Barley	MCM	Year	WFblue (MCM)	WFgreen (MCM)	WFgrey (MCM)	Production (ton)		Cotton	MCM	Year	WFblue (MCM)	WFgreen (MCM)	WFgrey (MCM)	Production (ton)		Gram	MCM	Year	WFblue (MCM)	WFgreen (MCM)	WFgrey (MCM)	Production (ton)		Groundnut	MCM	Year	WFblue (MCM)	WFgreen (MCM)	WFgrey (MCM)	Production (ton)		Guar	MCM	Year	WFblue (MCM)	WFgreen (MCM)	WFgrey (MCM)	Production (ton)		Jowar/Sorghum	MCM
	Ajmer	2008-09	0.0624172	208.785	6.2581	53412.7			Ajmer	2008-09	10.3553	7.79154	0.569068	12051.2			Ajmer	2008-09	1.53851	2.35697	0.056524	1217.72			Ajmer	2008-09	0.200998	14.4597	0.729605	6189.9			Ajmer	2008-09	0.853557	5.411	0.128654	1148.82			Ajmer	2008-09	0	17.4859	0.528703	2969.27			Ajmer
	Ajmer	2009-10	0.00376751	22.0615	0.493656	4231.33			Ajmer	2009-10	4.92486	3.41894	0.227187	5664.25			Ajmer	2009-10	0.834481	0.950974	0.0199771	499.914			Ajmer	2009-10	0.0156531	0.0916111	0.00428211	42.549			Ajmer	2009-10	0.294069	0.979921	0.0199804	181.979			Ajmer	2009-10	0	0.179473	0.00442625	27.4932			Ajmer
	Ajmer	2010-11	0.0322564	673.117	8.74901	84050			Ajmer	2010-11	24.0063	53.0017	2.05172	62595.5			Ajmer	2010-11	0.823629	1.24755	0.0195631	632.745			Ajmer	2010-11	0.776258	139.808	5.44783	60489.6			Ajmer	2010-11	2.55846	9.28641	0.147957	1875.43			Ajmer	2010-11	0	19.966	0.372816	3581.32			Ajmer
	Ajmer	2011-12	0.00162052	234.732	6.78602	62403			Ajmer	2011-12	23.5273	20.0465	1.4845	31054.9			Ajmer	2011-12	2.70228	5.07175	0.11064	2457.69			Ajmer	2011-12	0.735247	92.7943	5.81991	43625.8			Ajmer	2011-12	2.08003	10.5205	0.237404	2371.62			Ajmer	2011-12	0	12.8185	0.360121	2340.19			Ajmer
	Ajmer	2012-13	0.00721415	211.915	7.35936	49761.4			Ajmer	2012-13	39.1104	34.2391	3.17657	54947.1			Ajmer	2012-13	3.78463	8.52313	0.220445	3890.69			Ajmer	2012-13	3.00176	163.162	12.1096	69879.2			Ajmer	2012-13	2.00647	6.67969	0.204564	1503.62			Ajmer	2012-13	0	36.3212	1.39473	7447.38			Ajmer
	Ajmer	2013-14	0.036785	223.251	9.7528	54704.3			Ajmer	2013-14	28.6666	26.696	3.26713	43402.6			Ajmer	2013-14	7.20186	10.1182	0.375335	5253.03			Ajmer	2013-14	1.94732	235.84	24.1042	116537			Ajmer	2013-14	2.71698	9.71604	0.37194	2271.46			Ajmer	2013-14	0	108.926	4.83014	19654.4			Ajmer
	Ajmer	2014-15	0.13594	348.314	9.97747	60960.3			Ajmer	2014-15	24.0298	18.9809	1.68502	31611.9			Ajmer	2014-15	12.3608	12.4328	0.352829	6869.9			Ajmer	2014-15	0.852818	58.6829	4.12637	25178.5			Ajmer	2014-15	3.84779	9.10735	0.259773	1847.94			Ajmer	2014-15	0	65.2349	2.0252	11378.9			Ajmer
	Ajmer	2015-16	0.27258	166.576	6.48439	30904.3			Ajmer	2015-16	24.3178	17.3681	2.04167	28502.6			Ajmer	2015-16	7.26237	7.43567	0.293245	4209.36			Ajmer	2015-16	2.53857	23.086	2.00524	10750.5			Ajmer	2015-16	3.5647	9.88942	0.376421	2251.82			Ajmer	2015-16	0	42.7002	1.84447	6850.39			Ajmer
	Ajmer	2016-17	0.00600182	161.687	9.31501	39621.6			Ajmer	2016-17	36.3408	26.8757	4.28653	46553.2			Ajmer	2016-17	5.41825	6.17494	0.307701	3409.46			Ajmer	2016-17	3.30554	171.238	19.4918	82056.1			Ajmer	2016-17	1.81972	6.95954	0.335577	1584.13			Ajmer	2016-17	0	54.5473	3.2538	10090.7			Ajmer
	Ajmer	2017-18	0	170.851	8.1433	45581.8			Ajmer	2017-18	22.0263	15.1626	1.91421	26875.9			Ajmer	2017-18	8.85215	11.1667	0.42816	6098.81			Ajmer	2017-18	5.36684	83.7609	7.23397	40206.2			Ajmer	2017-18	1.58163	5.88046	0.222918	1367.46			Ajmer	2017-18	0	49.2577	2.30787	8648.58			Ajmer
	Ajmer	2018-19	0.0202542	333.923	11.7969	67055.9			Ajmer	2018-19	22.7015	16.1744	1.60996	27903			Ajmer	2018-19	8.24644	8.69327	0.290613	5256.41			Ajmer	2018-19	2.68776	120.56	9.2749	56380			Ajmer	2018-19	1.01937	4.05965	0.12355	865.381			Ajmer	2018-19	0	38.4189	1.46124	7286.35			Ajmer
	Ajmer	2019-20	0.0359416	240.039	8.93673	61612.9			Ajmer	2019-20	34.5041	31.7774	3.6639	61123.3			Ajmer	2019-20	5.86343	7.84069	0.246748	4389.07			Ajmer	2019-20	7.47645	382.366	40.0014	160046			Ajmer	2019-20	0.438365	5.02675	0.152438	1084.67			Ajmer	2019-20	0	42.3025	1.59033	8378.88			Ajmer
	Bhilwara	2008-09	0.00113008	9.869	0.854282	2648.13			Bhilwara	2008-09	16.9223	10.7477	2.44434	18146.5			Bhilwara	2008-09	3.50437	6.31851	0.41913	3133.5			Bhilwara	2008-09	3.10261	25.5059	3.88908	11499.2			Bhilwara	2008-09	0.35034	50.7423	3.30079	10367.6			Bhilwara	2008-09	0	29.624	2.5727	5315.15			Bhilwara
	Bhilwara	2009-10	0	2.54002	0.177617	538.801			Bhilwara	2009-10	11.2627	7.56984	1.59282	13142.6			Bhilwara	2009-10	1.9084	5.44034	0.294217	2397.11			Bhilwara	2009-10	0.683245	2.30958	0.351877	1164.85			Bhilwara	2009-10	0.0820637	17.9151	1.016	2851.41			Bhilwara	2009-10	0	1.05486	0.0772622	162.81			Bhilwara
	Bhilwara	2010-11	0	48.2196	2.09712	5089.37			Bhilwara	2010-11	40.4983	44.7424	6.48118	65957.6			Bhilwara	2010-11	4.63995	10.3501	0.472921	4875.14			Bhilwara	2010-11	2.40867	87.638	10.3802	39124.7			Bhilwara	2010-11	0.863204	53.1601	2.58371	8867.27			Bhilwara	2010-11	0	23.8793	1.40814	4405.75			Bhilwara
	Bhilwara	2011-12	0	7.64948	0.676604	2140.81			Bhilwara	2011-12	44.6641	32.0714	7.62346	54820.9			Bhilwara	2011-12	15.6519	35.0614	2.27624	16724			Bhilwara	2011-12	2.772	44.0526	8.03479	20889.1			Bhilwara	2011-12	0.115203	35.2776	2.34672	7426.27			Bhilwara	2011-12	0	16.8258	1.4059	3112.27			Bhilwara
	Bhilwara	2012-13	0	15.1008	1.43353	3522.44			Bhilwara	2012-13	53.1844	37.9964	9.79741	65037.4			Bhilwara	2012-13	30.4201	46.1528	3.32446	22681.7			Bhilwara	2012-13	5.99381	71.2319	13.8637	32086.1			Bhilwara	2012-13	1.26931	35.7974	2.67596	6591.54			Bhilwara	2012-13	0	71.7668	7.07514	14364.1			Bhilwara
	Bhilwara	2013-14	0	9.22568	0.86213	2241.55			Bhilwara	2013-14	46.0903	36.2658	10.6688	65555.6			Bhilwara	2013-14	19.2857	39.0971	2.99172	18713.8			Bhilwara	2013-14	4.45631	99.5431	22.5556	51257.1			Bhilwara	2013-14	0.511947	30.296	2.3271	5406.89			Bhilwara	2013-14	0	182.392	18.1012	32594.3			Bhilwara
	Bhilwara	2014-15	0	14.1736	1.36241	2366.58			Bhilwara	2014-15	32.8932	22.7963	6.34865	40822.9			Bhilwara	2014-15	34.9591	41.8491	3.33428	21614.4			Bhilwara	2014-15	3.27292	37.1239	7.97573	17416.1			Bhilwara	2014-15	0.696993	46.5577	3.51662	7439.76			Bhilwara	2014-15	0	107.339	10.1391	18639.4			Bhilwara
	Bhilwara	2015-16	0	6.11891	0.58122	1542.64			Bhilwara	2015-16	30.4181	19.6084	5.08006	34063.2			Bhilwara	2015-16	27.7171	32.7359	2.63236	17846.1			Bhilwara	2015-16	5.70242	19.2072	3.6844	9465.44			Bhilwara	2015-16	1.95742	27.9854	2.09457	5322.34			Bhilwara	2015-16	0	43.3472	4.04435	7396.59			Bhilwara
	Bhilwara	2016-17	0	10.7084	0.919048	2782.15			Bhilwara	2016-17	58.0757	39.3376	9.7786	71441			Bhilwara	2016-17	19.9867	30.2373	2.10714	15414.7			Bhilwara	2016-17	11.3518	65.6194	11.8399	33693.5			Bhilwara	2016-17	0.345388	41.9965	2.8447	8019.94			Bhilwara	2016-17	0	58.9396	5.27951	11224.9			Bhilwara
	Bhilwara	2017-18	0	10.3008	1.06194	2238.86			Bhilwara	2017-18	45.3662	30.571	8.86696	56706.3			Bhilwara	2017-18	32.5448	46.665	3.80407	24358.4			Bhilwara	2017-18	23.9062	61.8535	13.2451	34641.5			Bhilwara	2017-18	0.717117	51.3379	4.06675	9933.18			Bhilwara	2017-18	0	39.8761	4.07171	7293.15			Bhilwara
	Bhilwara	2018-19	0	11.4714	0.827652	3186.93			Bhilwara	2018-19	44.5294	30.393	6.05465	53986.2			Bhilwara	2018-19	29.7504	40.963	2.4277	22358.8			Bhilwara	2018-19	36.8291	106.984	17.0575	56132.4			Bhilwara	2018-19	0.113618	73.4628	4.12083	14861.5			Bhilwara	2018-19	0	33.2322	2.4935	6765.14			Bhilwara
	Bhilwara	2019-20	0	3.87112	0.408062	1071.3			Bhilwara	2019-20	46.4373	38.6231	13.3114	78921.2			Bhilwara	2019-20	22.6498	35.5814	3.00931	18703.2			Bhilwara	2019-20	43.5766	229.594	76.1082	117649			Bhilwara	2019-20	0.0861602	37.6551	3.02407	8445.41			Bhilwara	2019-20	0	20.0448	2.13955	3955.1			Bhilwara
	Bundi	2008-09	0	1.75467	0.291499	436.81			Bundi	2008-09	0.285924	0.182946	0.0830372	322.109			Bundi	2008-09	0.000771785	0.00105838	0.000143568	0.556577			Bundi	2008-09	0.558103	1.56586	0.503228	800.261			Bundi	2008-09	0.0647969	0.579369	0.0744801	117.206			Bundi	2008-09	0	0.476506	0.0817291	76.4208			Bundi
	Bundi	2009-10	0	3.3222	0.64338	362.894			Bundi	2009-10	0.201465	0.151413	0.0689365	256.406			Bundi	2009-10	0.000350885	0.000578833	7.84521e-05	0.278289			Bundi	2009-10	0.252944	1.47476	0.467392	711.034			Bundi	2009-10	0.0943207	0.555519	0.10098	65.424			Bundi	2009-10	0	0	0	0			Bundi
	Bundi	2010-11	0	11.6494	2.15514	753.072			Bundi	2010-11	0.261994	0.273386	0.107833	425.674			Bundi	2010-11	9.48391e-05	0.000320935	3.81053e-05	0.139144			Bundi	2010-11	0.483555	3.26114	1.05503	1486.66			Bundi	2010-11	0.116492	1.16261	0.195041	107.88			Bundi	2010-11	0	0.334173	0.0512549	62.5008			Bundi
	Bundi	2011-12	0	1.7102	0.267532	442.934			Bundi	2011-12	0.448832	0.293105	0.1486	554.434			Bundi	2011-12	0.00442871	0.00846472	0.00106352	4.03519			Bundi	2011-12	0.787968	1.80299	0.736532	1011.43			Bundi	2011-12	0.00747817	0.674249	0.0816677	133.493			Bundi	2011-12	0	0.158893	0.0248458	28.6752			Bundi
	Bundi	2012-13	0	1.75727	0.269773	407.856			Bundi	2012-13	0.419749	0.318141	0.152995	585.058			Bundi	2012-13	0.0106473	0.0127568	0.0016283	6.53978			Bundi	2012-13	0.916386	2.02845	0.844811	902.294			Bundi	2012-13	0.0136921	0.648357	0.0881634	104.957			Bundi	2012-13	0	0.21508	0.0352382	41.3424			Bundi
	Bundi	2013-14	0	0.730896	0.112224	172.19			Bundi	2013-14	0.240949	0.182404	0.102195	364.147			Bundi	2013-14	0.00467636	0.00972674	0.00121577	4.45262			Bundi	2013-14	0.257274	0.561768	0.268319	351.898			Bundi	2013-14	0.0272333	0.583352	0.0726165	112.056			Bundi	2013-14	0	2.09747	0.348359	303.874			Bundi
	Bundi	2014-15	0.0507597	2.00817	0.440655	205.598			Bundi	2014-15	0.218415	0.147882	0.090273	282.576			Bundi	2014-15	0.0101516	0.0132644	0.00218358	6.40064			Bundi	2014-15	0.0931193	0.163355	0.0851933	77.8128			Bundi	2014-15	0.11394	0.697899	0.120191	131.405			Bundi	2014-15	0	0.407186	0.0797769	67.2336			Bundi
	Bundi	2015-16	0.00391573	0.819784	0.151897	206.434			Bundi	2015-16	0.26239	0.159799	0.0911086	301.229			Bundi	2015-16	0.00529375	0.0105174	0.00148953	4.87005			Bundi	2015-16	0.446392	0.60134	0.278193	370.829			Bundi	2015-16	0.115065	0.665702	0.0976605	145.186			Bundi	2015-16	0	0.338052	0.0626203	55.68			Bundi
	Bundi	2016-17	0.00388143	0.698609	0.124754	188.338			Bundi	2016-17	0.375904	0.2427	0.13645	477.317			Bundi	2016-17	0.0136095	0.0288054	0.00407132	13.9381			Bundi	2016-17	1.73171	2.206	1.03946	1505.87			Bundi	2016-17	0.0669662	0.632382	0.0936279	126.394			Bundi	2016-17	0	0.620215	0.117155	111.36			Bundi
	Bundi	2017-18	0	0.828433	0.140344	218.962			Bundi	2017-18	0.686876	0.457435	0.220722	874.454			Bundi	2017-18	0.0282132	0.0379721	0.00516633	20.5877			Bundi	2017-18	10.3584	13.591	5.34215	9022.25			Bundi	2017-18	0.0887287	0.478231	0.0646301	105.235			Bundi	2017-18	0	0.0414661	0.00678325	6.8208			Bundi
	Bundi	2018-19	0	0.514569	0.0820759	138.504			Bundi	2018-19	0.599212	0.408011	0.209917	800.678			Bundi	2018-19	0	0.0572158	0.00618152	22.6701			Bundi	2018-19	5.45165	7.70082	3.58599	4922.25			Bundi	2018-19	0.0115962	0.488321	0.0655854	94.3776			Bundi	2018-19	0	0.0226792	0.00376579	4.4544			Bundi
	Bundi	2019-20	0	0.962977	0.184757	266.568			Bundi	2019-20	0.796725	0.623676	0.434675	1382.67			Bundi	2019-20	0.00709285	0.00939117	0.00150005	5.13509			Bundi	2019-20	7.13519	12.6075	9.39022	6530.57			Bundi	2019-20	0.000553899	0.513339	0.0739072	112.891			Bundi	2019-20	0	0.062556	0.0124183	12.528			Bundi
	Chittaurgarh	2008-09	0	0.0843745	0.0115458	23.5332			Chittaurgarh	2008-09	13.9401	8.46228	2.94622	14388.4			Chittaurgarh	2008-09	0.986464	2.05234	0.203192	982.772			Chittaurgarh	2008-09	4.24213	12.7423	3.08097	5974.82			Chittaurgarh	2008-09	3.14898	119.335	12.5747	24267.1			Chittaurgarh	2008-09	0	25.0502	3.39543	4534.93			Chittaurgarh
	Chittaurgarh	2009-10	0	0.0193276	0.00250268	4.358			Chittaurgarh	2009-10	9.94269	6.5202	2.50098	11134.7			Chittaurgarh	2009-10	3.13051	5.68759	0.603614	2585			Chittaurgarh	2009-10	3.3521	7.12699	2.00282	3726.96			Chittaurgarh	2009-10	0.752364	113.79	12.7904	18008.1			Chittaurgarh	2009-10	0	6.05776	0.829043	1033.72			Chittaurgarh
	Chittaurgarh	2010-11	0.00220436	0.0601425	0.00770171	14.8172			Chittaurgarh	2010-11	11.228	10.0672	3.13806	15349.7			Chittaurgarh	2010-11	3.75099	6.85107	0.666448	3260.22			Chittaurgarh	2010-11	2.55778	17.3222	4.11448	7609.94			Chittaurgarh	2010-11	3.34394	156.629	16.2752	27030.1			Chittaurgarh	2010-11	0	7.78252	0.968259	1434.65			Chittaurgarh
	Chittaurgarh	2011-12	0.00205123	0.11198	0.0178739	29.6344			Chittaurgarh	2011-12	17.834	11.5482	5.50266	20693.5			Chittaurgarh	2011-12	9.85027	23.7681	2.9541	11252.2			Chittaurgarh	2011-12	3.17668	9.47462	3.63983	4960.28			Chittaurgarh	2011-12	1.55508	112.878	13.8902	23331			Chittaurgarh	2011-12	0	12.9034	2.02317	2344.6			Chittaurgarh
	Chittaurgarh	2012-13	0	0.0636213	0.0109597	17.432			Chittaurgarh	2012-13	17.4727	11.5683	5.56611	20705.7			Chittaurgarh	2012-13	10.3788	19.3806	2.40719	9257.05			Chittaurgarh	2012-13	3.59394	11.6795	4.50764	5994.86			Chittaurgarh	2012-13	3.34249	104.823	15.0778	20949.8			Chittaurgarh	2012-13	0	25.4857	4.49812	5213.91			Chittaurgarh
	Chittaurgarh	2013-14	0	0.0321447	0.00495248	7.8444			Chittaurgarh	2013-14	16.8696	12.7332	6.5025	23704			Chittaurgarh	2013-14	7.32376	17.4112	2.12361	7884.82			Chittaurgarh	2013-14	4.76699	14.3325	5.88597	8001.29			Chittaurgarh	2013-14	0.773641	68.6318	8.41655	13808.8			Chittaurgarh	2013-14	0	48.4678	7.80962	8615.77			Chittaurgarh
	Chittaurgarh	2014-15	0	0.158705	0.0250176	24.4048			Chittaurgarh	2014-15	15.6201	10.5142	4.76926	19174.3			Chittaurgarh	2014-15	12.7419	16.2423	2.13732	8405.83			Chittaurgarh	2014-15	3.57662	8.96866	3.28257	4765.04			Chittaurgarh	2014-15	3.51529	98.394	14.2342	12943.3			Chittaurgarh	2014-15	0	29.6921	4.481	5450.99			Chittaurgarh
	Chittaurgarh	2015-16	0.0338986	0.205985	0.0334098	40.0936			Chittaurgarh	2015-16	20.1966	12.1378	5.04531	21730.7			Chittaurgarh	2015-16	8.73242	9.8796	1.26797	5407.86			Chittaurgarh	2015-16	5.21519	8.59342	2.73152	4687.46			Chittaurgarh	2015-16	5.46726	49.5325	6.45183	9815.09			Chittaurgarh	2015-16	0	22.6968	3.51133	3931.79			Chittaurgarh
	Chittaurgarh	2016-17	0	0.790921	0.0935063	196.11			Chittaurgarh	2016-17	24.1167	15.8413	5.61101	30072.8			Chittaurgarh	2016-17	7.48437	12.0957	1.16304	6168.55			Chittaurgarh	2016-17	7.92536	15.4444	4.29656	9278.18			Chittaurgarh	2016-17	0.917787	67.6229	6.57289	12351.4			Chittaurgarh	2016-17	0	18.8321	2.30414	3638.93			Chittaurgarh
	Chittaurgarh	2017-18	0.00388168	0.0874821	0.0133253	23.5332			Chittaurgarh	2017-18	23.0558	14.7062	6.1364	27673.3			Chittaurgarh	2017-18	9.40468	12.5804	1.53442	6853.25			Chittaurgarh	2017-18	21.4835	36.2913	11.5861	21825.7			Chittaurgarh	2017-18	1.03831	138.264	15.332	27369.1			Chittaurgarh	2017-18	0	20.243	2.97618	3681.64			Chittaurgarh
	Chittaurgarh	2018-19	0	0.188073	0.0235868	51.4244			Chittaurgarh	2018-19	21.2105	13.599	5.01784	24875.5			Chittaurgarh	2018-19	10.3761	14.0257	1.4711	7534.84			Chittaurgarh	2018-19	62.6982	99.4525	30.5473	57414			Chittaurgarh	2018-19	0.31221	214.706	20.3471	44510.9			Chittaurgarh	2018-19	0	7.71436	1.032	1557.55			Chittaurgarh
	Chittaurgarh	2019-20	0	0.36917	0.0514905	105.464			Chittaurgarh	2019-20	16.7279	14.0293	6.17744	28203.2			Chittaurgarh	2019-20	5.22583	6.96438	0.786716	3806.24			Chittaurgarh	2019-20	71.1604	161.222	73.79	87379.6			Chittaurgarh	2019-20	0.116968	76.3648	7.87992	17404.1			Chittaurgarh	2019-20	0	9.26614	1.29515	1846.92			Chittaurgarh
	Dausa	2008-09	0.00757821	565.194	60.7645	140436			Dausa	2008-09	13.9177	8.44752	2.89642	15880.7			Dausa	2008-09	0.00640171	0.0146182	0.00121822	6.65034			Dausa	2008-09	1.95918	10.3164	2.39273	5146.76			Dausa	2008-09	10.1045	76.0422	6.4309	15918			Dausa	2008-09	0	25.244	2.87067	4562.63			Dausa
	Dausa	2009-10	0.852011	573.135	74.1728	122839			Dausa	2009-10	9.61694	7.20958	2.47757	12807			Dausa	2009-10	0.0389649	0.0441062	0.0044212	23.2762			Dausa	2009-10	1.1325	6.47442	1.61576	3240.01			Dausa	2009-10	31.4924	63.9785	7.11834	13333.3			Dausa	2009-10	0	15.3206	1.8676	2335.2			Dausa
	Dausa	2010-11	0.00118519	644.254	80.289	133628			Dausa	2010-11	8.61361	8.75475	3.07564	14457.6			Dausa	2010-11	0.00837333	0.00997823	0.00106226	5.32027			Dausa	2010-11	1.17759	17.8028	5.46978	8040.82			Dausa	2010-11	13.1547	91.996	9.7652	15858.8			Dausa	2010-11	0	22.942	2.81033	4155.46			Dausa
	Dausa	2011-12	0	570.671	74.1573	151705			Dausa	2011-12	10.0107	6.72207	2.78005	12868.2			Dausa	2011-12	0.00533144	0.0151048	0.0014113	6.65034			Dausa	2011-12	1.67333	16.4579	5.38557	8534.47			Dausa	2011-12	4.88961	82.8154	7.94613	17498.1			Dausa	2011-12	0	16.4926	2.04943	2925.99			Dausa
	Dausa	2012-13	0	720.625	97.9418	166547			Dausa	2012-13	11.8187	8.32363	3.46975	15692.4			Dausa	2012-13	0.0162622	0.0185589	0.00211285	9.97551			Dausa	2012-13	3.92815	24.4847	8.80594	11395.3			Dausa	2012-13	15.7675	96.7978	11.8953	16416.3			Dausa	2012-13	0	33.2913	4.90872	6557.86			Dausa
	Dausa	2013-14	0	624.921	79.4126	151853			Dausa	2013-14	8.71761	6.97668	3.10891	13649.3			Dausa	2013-14	0.000910616	0.00129701	0.000147048	0.665034			Dausa	2013-14	4.21239	32.6655	12.2318	19216.5			Dausa	2013-14	5.06954	61.9146	6.57956	12310.7			Dausa	2013-14	0	73.0072	9.84235	12416.5			Dausa
	Dausa	2014-15	0.0193024	1501.52	211.243	164821			Dausa	2014-15	9.82841	6.7907	2.73016	13340.6			Dausa	2014-15	0.00353708	0.00374644	0.000412198	1.9951			Dausa	2014-15	3.99687	31.0383	10.7643	16160.1			Dausa	2014-15	10.7223	75.6341	9.72663	9217.73			Dausa	2014-15	0	47.286	5.63941	8044.14			Dausa
	Dausa	2015-16	0.00753623	454.558	61.6172	112011			Dausa	2015-16	9.68886	6.09996	2.38195	11670.7			Dausa	2015-16	0.000689914	0.0060736	0.000547992	2.66014			Dausa	2015-16	3.68372	16.5848	4.85654	8531.81			Dausa	2015-16	8.40314	48.4914	5.17504	9318.19			Dausa	2015-16	0	45.4886	5.62829	7227.15			Dausa
	Dausa	2016-17	0	629.216	83.5394	161555			Dausa	2016-17	11.8074	7.42014	3.04839	14110.3			Dausa	2016-17	0.000553685	0.00643692	0.000599243	2.60132			Dausa	2016-17	5.39573	27.8528	8.63328	14520.8			Dausa	2016-17	0.525892	43.3861	4.42978	8821.21			Dausa	2016-17	0	54.6508	7.53794	9738			Dausa
	Dausa	2017-18	0	593.368	86.5704	138374			Dausa	2017-18	10.9141	7.01874	2.84087	13520.2			Dausa	2017-18	0.00395216	0.00317244	0.000412748	1.9951			Dausa	2017-18	5.87921	16.8529	4.86235	9184.47			Dausa	2017-18	1.99021	56.875	6.51917	9680.78			Dausa	2017-18	0	45.3337	6.0386	7035.55			Dausa
	Dausa	2018-19	0	637.502	86.5313	177708			Dausa	2018-19	8.65783	5.99878	2.52248	11781.8			Dausa	2018-19	0.00178984	0.00205252	0.000253835	1.24411			Dausa	2018-19	6.35069	31.889	10.9615	17573.9			Dausa	2018-19	2.33555	63.1281	7.19638	12076.5			Dausa	2018-19	0	34.9628	4.91574	6967.02			Dausa
	Dausa	2019-20	0	757.201	114.039	203537			Dausa	2019-20	7.41219	5.84413	3.14964	12467.7			Dausa	2019-20	0.000902098	0.00103715	0.000133079	0.565505			Dausa	2019-20	10.7365	60.4995	32.5144	22222.4			Dausa	2019-20	3.93409	65.2221	8.25929	13875.5			Dausa	2019-20	0	30.2662	4.70596	5897.88			Dausa
	Jaipur	2008-09	31.3071	1223.14	76.5758	302223			Jaipur	2008-09	89.9688	59.2216	10.6107	101399			Jaipur	2008-09	0.0230888	0.0351647	0.00178436	17.2285			Jaipur	2008-09	5.93202	40.0113	5.11817	19099.5			Jaipur	2008-09	102.692	239.867	13.3087	57797.6			Jaipur	2008-09	0	183.297	11.933	30928.9			Jaipur
	Jaipur	2009-10	29.2889	781.029	46.677	159182			Jaipur	2009-10	78.3904	57.9398	10.5843	99944.1			Jaipur	2009-10	0	0	0	0			Jaipur	2009-10	2.99672	6.44206	0.925436	3514.7			Jaipur	2009-10	115.336	160.695	9.48579	38847.9			Jaipur	2009-10	0	63.9282	3.93147	9496.71			Jaipur
	Jaipur	2010-11	7.33686	1300.66	80.1398	295514			Jaipur	2010-11	94.473	98.568	18.0121	159893			Jaipur	2010-11	0.0323466	0.0470286	0.00248171	23.1922			Jaipur	2010-11	6.3689	265.214	43.7041	125568			Jaipur	2010-11	112.421	263.641	14.8225	60435.3			Jaipur	2010-11	0	153.702	9.70644	27052.3			Jaipur
	Jaipur	2011-12	5.45541	1342.73	78.5795	327628			Jaipur	2011-12	84.2942	63.1232	11.601	111138			Jaipur	2011-12	0.0376349	0.0692713	0.00324521	32.4691			Jaipur	2011-12	6.11509	119.72	19.0432	61302.3			Jaipur	2011-12	97.8385	298.375	14.8468	67082.2			Jaipur	2011-12	0	137.792	8.13484	24036.1			Jaipur
	Jaipur	2012-13	8.00221	1191.56	79.5315	281518			Jaipur	2012-13	83.8546	68.6116	14.2317	122138			Jaipur	2012-13	0.111921	0.106572	0.00643771	58.9745			Jaipur	2012-13	13.972	246.792	44.3764	109500			Jaipur	2012-13	122.209	202.577	12.7437	49698.3			Jaipur	2012-13	0	149.207	11.5628	29674.1			Jaipur
	Jaipur	2013-14	5.34316	1252.91	82.2371	302446			Jaipur	2013-14	78.9533	64.9548	13.6789	116201			Jaipur	2013-14	0.0395202	0.0527492	0.00301882	26.5054			Jaipur	2013-14	7.14323	227.763	39.5765	116080			Jaipur	2013-14	86.2255	254.178	15.1848	59065.7			Jaipur	2013-14	0	281.134	19.2028	46757			Jaipur
	Jaipur	2014-15	14.4209	1957.33	111.709	322820			Jaipur	2014-15	90.6062	68.2887	13.912	123964			Jaipur	2014-15	0.129988	0.138876	0.0078155	71.5646			Jaipur	2014-15	5.11699	129.51	22.3982	57124.7			Jaipur	2014-15	121.114	195.649	11.8027	45297.9			Jaipur	2014-15	0	256.799	15.6047	40470			Jaipur
	Jaipur	2015-16	36.0203	1038.85	83.58	236630			Jaipur	2015-16	96.8549	66.9543	16.9721	119363			Jaipur	2015-16	0.0735039	0.0790452	0.00588023	42.4086			Jaipur	2015-16	4.53354	16.3905	3.26971	8577.26			Jaipur	2015-16	86.1266	165.994	12.2847	38289.8			Jaipur	2015-16	0	225.39	18.5494	33294.8			Jaipur
	Jaipur	2016-17	3.74497	1290.14	126.077	327676			Jaipur	2016-17	100.946	70.0864	20.5967	125707			Jaipur	2016-17	0.0444004	0.0673924	0.00545038	33.5825			Jaipur	2016-17	7.2859	142.375	31.3482	69671.5			Jaipur	2016-17	69.3563	164.385	14.645	40255.3			Jaipur	2016-17	0	220.791	21.9375	39221.1			Jaipur
	Jaipur	2017-18	7.80893	1237.64	105.537	295189			Jaipur	2017-18	96.5062	67.4236	16.6112	121109			Jaipur	2017-18	0.115254	0.127412	0.00936255	69.5316			Jaipur	2017-18	4.31654	34.1434	6.03569	17100.8			Jaipur	2017-18	84.1385	141.832	11.1406	36085.6			Jaipur	2017-18	0	205.155	17.3655	33225.9			Jaipur
	Jaipur	2018-19	2.43332	1326.7	102.364	304090			Jaipur	2018-19	91.4863	68.5538	15.7785	122060			Jaipur	2018-19	0.213874	0.355689	0.022956	183.577			Jaipur	2018-19	4.91317	119.694	22.9994	58921.2			Jaipur	2018-19	85.6886	170.022	12.3326	43301.3			Jaipur	2018-19	0	157.195	12.7171	29910			Jaipur
	Jaipur	2019-20	1.58444	1562.16	141.919	377499			Jaipur	2019-20	67.4949	59.1915	18.5985	118148			Jaipur	2019-20	0.38712	0.49128	0.0392266	267.759			Jaipur	2019-20	14.4132	281.822	93.0212	100861			Jaipur	2019-20	84.9039	229.458	19.3843	55641.8			Jaipur	2019-20	0	186.515	17.5819	35295.4			Jaipur
	Karauli	2008-09	0	238.725	20.7665	59765.9			Karauli	2008-09	0.38992	0.285068	0.0730096	493.616			Karauli	2008-09	0.00818533	0.0134656	0.000941573	6.43463			Karauli	2008-09	0.728361	8.83745	1.58519	4339.55			Karauli	2008-09	0.0279487	3.19158	0.200558	580.811			Karauli	2008-09	0	5.64344	0.522692	965.287			Karauli
	Karauli	2009-10	0.169795	340.302	38.0284	72498.1			Karauli	2009-10	0.303894	0.29315	0.0883718	485.423			Karauli	2009-10	0.0314074	0.0276683	0.00261821	14.9166			Karauli	2009-10	0.342609	11.7891	2.66255	5871.6			Karauli	2009-10	0.122183	5.90713	0.310516	442.411			Karauli	2009-10	0	8.77444	0.917933	1360.59			Karauli
	Karauli	2010-11	0	360.169	39.2536	74298.5			Karauli	2010-11	0.217729	0.277317	0.0805281	416.077			Karauli	2010-11	0.0132382	0.0168974	0.0015889	8.77449			Karauli	2010-11	0.252621	13.7828	3.59102	6503.33			Karauli	2010-11	0.107574	4.13754	0.366536	648.987			Karauli	2010-11	0	1.23062	0.13348	217.109			Karauli
	Karauli	2011-12	0	288.676	30.5231	74148.1			Karauli	2011-12	0.16531	0.147038	0.0462157	251.343			Karauli	2011-12	0.0117647	0.0220577	0.00179809	10.2369			Karauli	2011-12	0.50233	10.456	2.94225	5739.06			Karauli	2011-12	0.0783399	2.80663	0.219628	548.332			Karauli	2011-12	0	2.04572	0.218264	367.798			Karauli
	Karauli	2012-13	0	296.079	32.2549	66701.4			Karauli	2012-13	0.188568	0.168345	0.0563433	284.407			Karauli	2012-13	0.0429098	0.0495683	0.00466239	25.446			Karauli	2012-13	1.17454	12.6499	3.78353	5879.5			Karauli	2012-13	0.00476401	1.60467	0.128788	265.096			Karauli	2012-13	0	8.81854	1.0263	1655.53			Karauli
	Karauli	2013-14	0	299.549	31.5863	72533.2			Karauli	2013-14	0.175567	0.162718	0.0584677	306.645			Karauli	2013-14	0.000555321	0.00127304	0.000108478	0.584966			Karauli	2013-14	0.824275	10.3352	3.26549	6190.83			Karauli	2013-14	0.00756597	1.86484	0.155944	355.802			Karauli	2013-14	0	25.3381	2.87959	4269.91			Karauli
	Karauli	2014-15	0	544.27	65.6225	75550.8			Karauli	2014-15	0.156615	0.122841	0.0488463	222.376			Karauli	2014-15	0.00288963	0.00278628	0.000305152	1.46241			Karauli	2014-15	0.464178	6.86321	2.36008	3345.59			Karauli	2014-15	0.0040721	1.31195	0.131512	215.646			Karauli	2014-15	0	10.4768	1.28936	1704.98			Karauli
	Karauli	2015-16	0.128012	274.006	33.3209	66237.6			Karauli	2015-16	0.0811402	0.0582838	0.0201186	106.799			Karauli	2015-16	0	0	0	0			Karauli	2015-16	0.183511	1.5342	0.388623	777.146			Karauli	2015-16	0.00714491	1.10291	0.0977039	196.042			Karauli	2015-16	0	13.0297	1.50318	2078.63			Karauli
	Karauli	2016-17	0	285.992	73.3979	72325.2			Karauli	2016-17	0.147091	0.118863	0.0869526	200.724			Karauli	2016-17	0	0	0	0			Karauli	2016-17	0.913802	7.87958	4.44082	4012.13			Karauli	2016-17	0.00376198	1.13624	0.232152	201.601			Karauli	2016-17	0	7.52713	2.03594	1382.54			Karauli
	Karauli	2017-18	0	340.007	84.7083	79751.6			Karauli	2017-18	0.146926	0.101627	0.076386	189.605			Karauli	2017-18	0.0014574	0.00150551	0.000335154	0.845614			Karauli	2017-18	0.708617	1.6849	0.942246	964.117			Karauli	2017-18	0.0268352	1.08861	0.212381	190.775			Karauli	2017-18	0	6.01122	1.56101	974.651			Karauli
	Karauli	2018-19	0	279.309	35.8651	73154.7			Karauli	2018-19	0.0803498	0.0739863	0.0282257	133.718			Karauli	2018-19	0	0	0	0			Karauli	2018-19	1.29467	8.64142	2.96728	4975.96			Karauli	2018-19	0.0721515	0.760794	0.078707	156.834			Karauli	2018-19	0	3.96874	0.524737	775.683			Karauli
	Karauli	2019-20	0	340.091	45.4792	85525.8			Karauli	2019-20	0.0524221	0.0502812	0.0224514	97.1432			Karauli	2019-20	0	0	0	0			Karauli	2019-20	1.30078	19.2369	8.06598	7235.12			Karauli	2019-20	0.227959	0.813081	0.096058	186.386			Karauli	2019-20	0	3.36044	0.469631	635.527			Karauli
	Pratapgarh	2008-09	0	0.0213998	0.0013953	6.09			Pratapgarh	2008-09	0.993643	0.575154	0.0887902	961.489			Pratapgarh	2008-09	0.0131682	0.269317	0.0101586	107.385			Pratapgarh	2008-09	4.04298	14.5849	1.48239	6269.78			Pratapgarh	2008-09	0.00489011	1.12971	0.0556288	230.446			Pratapgarh	2008-09	0	0.123961	0.00795635	23.3856			Pratapgarh
	Pratapgarh	2009-10	0	0.00424992	0.000249836	0.9744			Pratapgarh	2009-10	1.00331	0.654287	0.113276	1128.6			Pratapgarh	2009-10	0.0204254	0.377454	0.0159326	143.423			Pratapgarh	2009-10	3.86116	13.0355	1.52411	6210.34			Pratapgarh	2009-10	0.00662325	1.37485	0.0657982	253.588			Pratapgarh	2009-10	0	0.120313	0.00752794	20.9496			Pratapgarh
	Pratapgarh	2010-11	0.000174378	0.00365314	0.000282388	0.9744			Pratapgarh	2010-11	0.809062	0.607629	0.126115	1004.61			Pratapgarh	2010-11	0.0113003	0.282151	0.0147628	108.602			Pratapgarh	2010-11	2.97633	10.8515	1.69333	5261.76			Pratapgarh	2010-11	0.00876703	2.19498	0.137527	383.67			Pratapgarh	2010-11	0	0.0387664	0.00298253	7.0644			Pratapgarh
	Pratapgarh	2011-12	0	0.00811967	0.000891406	2.1924			Pratapgarh	2011-12	1.18101	0.691807	0.22504	1273.3			Pratapgarh	2011-12	0.0131964	0.262615	0.0191895	105.924			Pratapgarh	2011-12	3.42452	8.86115	2.18313	4546.31			Pratapgarh	2011-12	0.000995246	1.16547	0.0959464	248.959			Pratapgarh	2011-12	0	0.038333	0.00427737	7.308			Pratapgarh
	Pratapgarh	2012-13	0	0.00823213	0.000962231	1.7052			Pratapgarh	2012-13	1.06708	0.626923	0.192834	1098.64			Pratapgarh	2012-13	0.00757335	0.145838	0.011049	56.7361			Pratapgarh	2012-13	3.91792	8.30961	1.94872	4130.48			Pratapgarh	2012-13	0.00531226	0.990613	0.099732	150.058			Pratapgarh	2012-13	0	0.146246	0.0166409	28.9884			Pratapgarh
	Pratapgarh	2013-14	0	0.00684261	0.000802604	1.7052			Pratapgarh	2013-14	0.867003	0.591024	0.230042	1134.93			Pratapgarh	2013-14	0.00431845	0.218298	0.0168536	84.2519			Pratapgarh	2013-14	4.2647	8.95614	2.72786	5220.35			Pratapgarh	2013-14	0.00106881	0.464073	0.0420376	96.9528			Pratapgarh	2013-14	0	0.155362	0.0189165	28.014			Pratapgarh
	Pratapgarh	2014-15	0	0.00413609	0.000492812	0.7308			Pratapgarh	2014-15	1.1931	0.736998	0.256079	1359.78			Pratapgarh	2014-15	0.0321045	0.251862	0.0228771	101.784			Pratapgarh	2014-15	4.95482	7.89673	2.20039	4399.17			Pratapgarh	2014-15	0	1.65747	0.180032	231.42			Pratapgarh	2014-15	0	0.0857166	0.0100489	16.0776			Pratapgarh
	Pratapgarh	2015-16	0	0.00410952	0.000520065	0.4872			Pratapgarh	2015-16	0.779925	0.433011	0.132556	785.854			Pratapgarh	2015-16	0.00664547	0.189323	0.0141349	74.0248			Pratapgarh	2015-16	5.93083	7.5813	1.7732	4281.03			Pratapgarh	2015-16	0	0.976809	0.092865	181.969			Pratapgarh	2015-16	0	0	0	0			Pratapgarh
	Pratapgarh	2016-17	0	0.0045723	0.00052833	1.218			Pratapgarh	2016-17	0.998522	0.594214	0.20853	1133.23			Pratapgarh	2016-17	0.00666566	0.274961	0.0225114	111.233			Pratapgarh	2016-17	5.86591	8.14209	2.24792	5104.15			Pratapgarh	2016-17	0	1.05544	0.0942541	217.291			Pratapgarh	2016-17	0	0.0276619	0.00333069	5.3592			Pratapgarh
	Pratapgarh	2017-18	0	0.00586301	0.000673554	1.4616			Pratapgarh	2017-18	1.09008	0.696542	0.222565	1282.55			Pratapgarh	2017-18	0.0136517	0.325404	0.0245813	129.33			Pratapgarh	2017-18	6.47262	8.81556	2.19459	5390.38			Pratapgarh	2017-18	0.00226755	1.85678	0.154332	353.464			Pratapgarh	2017-18	0	0.0210728	0.00234031	3.8976			Pratapgarh
	Pratapgarh	2018-19	0	0.00271807	0.000266289	0.7308			Pratapgarh	2018-19	0.720948	0.416123	0.121996	767.34			Pratapgarh	2018-19	0.00391864	0.268767	0.0187674	109.618			Pratapgarh	2018-19	11.3931	14.1343	3.45282	8477.77			Pratapgarh	2018-19	0.00089716	3.80476	0.282157	771.968			Pratapgarh	2018-19	0	0.0157593	0.00165827	3.1668			Pratapgarh
	Pratapgarh	2019-20	0	0.00090499	9.25843e-05	0.2436			Pratapgarh	2019-20	0.949586	0.718694	0.239313	1435.29			Pratapgarh	2019-20	0	0.0980114	0.0066992	38.7202			Pratapgarh	2019-20	8.48972	16.3408	5.28148	10306			Pratapgarh	2019-20	0.006256	1.08172	0.083437	238.241			Pratapgarh	2019-20	0	0.0140313	0.00145441	2.6796			Pratapgarh
	Rajsamand	2008-09	0	1.09269	0.114651	374.084			Rajsamand	2008-09	4.33175	2.84775	0.622376	4951.59			Rajsamand	2008-09	3.4675	4.69077	0.384901	3046.2			Rajsamand	2008-09	0.0651919	0.615421	0.0916004	284.669			Rajsamand	2008-09	0.0240429	6.44069	0.498667	1679.73			Rajsamand	2008-09	0	21.275	2.07734	4770.94			Rajsamand
	Rajsamand	2009-10	0	0.754687	0.0572298	164.232			Rajsamand	2009-10	2.02684	1.48061	0.263654	2585.74			Rajsamand	2009-10	2.07365	3.73019	0.212131	2056.64			Rajsamand	2009-10	0.0087228	0.202048	0.0240216	95.802			Rajsamand	2009-10	0.00500518	7.38026	0.430288	1345.79			Rajsamand	2009-10	0	6.34935	0.487091	1322.07			Rajsamand
	Rajsamand	2010-11	0	2.69657	0.214413	458.025			Rajsamand	2010-11	8.14937	9.13617	1.58061	13844.8			Rajsamand	2010-11	1.5968	2.86796	0.187236	1673.58			Rajsamand	2010-11	0.180454	2.29879	0.324147	1095.79			Rajsamand	2010-11	0.141076	10.5846	0.663939	1718.96			Rajsamand	2010-11	0	8.03621	0.679818	1833.92			Rajsamand
	Rajsamand	2011-12	0	1.87259	0.225318	496.346			Rajsamand	2011-12	15.1505	10.6851	2.85055	18887.6			Rajsamand	2011-12	4.95837	8.03586	0.735943	5017.1			Rajsamand	2011-12	0.314725	1.6388	0.341651	857.656			Rajsamand	2011-12	0.132059	6.43769	0.559499	1592.14			Rajsamand	2011-12	0	7.78551	0.88902	1803.81			Rajsamand
	Rajsamand	2012-13	0	1.112	0.134022	323.902			Rajsamand	2012-13	17.5568	12.4142	3.30645	21526.3			Rajsamand	2012-13	3.99132	5.3524	0.477557	3184.83			Rajsamand	2012-13	0.311831	1.15769	0.233482	581.199			Rajsamand	2012-13	0.299298	8.87653	0.788457	1850.35			Rajsamand	2012-13	0	14.6091	1.8244	3585.73			Rajsamand
	Rajsamand	2013-14	0	0.995382	0.119898	277.37			Rajsamand	2013-14	12.3569	9.67557	2.97869	18055.5			Rajsamand	2013-14	3.43675	5.79396	0.536885	3325.28			Rajsamand	2013-14	0.328621	2.01832	0.486411	1138.68			Rajsamand	2013-14	0.0732074	4.89067	0.457302	1222.62			Rajsamand	2013-14	0	11.5843	1.44335	2603.08			Rajsamand
	Rajsamand	2014-15	0	1.43682	0.121691	314.778			Rajsamand	2014-15	8.29434	6.01018	1.43783	11116.7			Rajsamand	2014-15	3.81814	4.80241	0.363165	2834.6			Rajsamand	2014-15	0.267313	1.69924	0.316109	931.56			Rajsamand	2014-15	0.158288	5.56804	0.404498	980.83			Rajsamand	2014-15	0	18.7052	1.74288	4066.57			Rajsamand
	Rajsamand	2015-16	0	0.803476	0.105884	259.122			Rajsamand	2015-16	12.0669	7.99893	2.36437	14184.2			Rajsamand	2015-16	2.12379	2.86704	0.27471	1660.82			Rajsamand	2015-16	0.275819	0.890679	0.194293	457.112			Rajsamand	2015-16	0.0233742	2.86943	0.265082	650.541			Rajsamand	2015-16	0	5.59196	0.736111	1160.57			Rajsamand
	Rajsamand	2016-17	0	0.993045	0.119675	326.639			Rajsamand	2016-17	13.7836	9.5829	2.80736	18035.4			Rajsamand	2016-17	1.41663	2.4423	0.221596	1418.15			Rajsamand	2016-17	0.254363	1.47027	0.316552	805.649			Rajsamand	2016-17	0.225826	10.8602	0.931485	2577.53			Rajsamand	2016-17	0	15.4221	1.94984	3698.87			Rajsamand
	Rajsamand	2017-18	0	0.746935	0.0937949	253.647			Rajsamand	2017-18	14.2322	9.85275	2.87714	18572.8			Rajsamand	2017-18	2.46243	3.76206	0.36855	2362.14			Rajsamand	2017-18	0.595202	2.45617	0.504902	1326.63			Rajsamand	2017-18	0.2986	9.50416	0.823755	2267.31			Rajsamand	2017-18	0	12.1022	1.43989	2603.08			Rajsamand
	Rajsamand	2018-19	0	1.1975	0.141321	282.844			Rajsamand	2018-19	10.6635	7.41399	1.88447	13371.2			Rajsamand	2018-19	3.55647	4.28375	0.396161	2892.3			Rajsamand	2018-19	0.523479	2.89295	0.56264	1504.55			Rajsamand	2018-19	0.257403	10.8369	0.902814	2248.15			Rajsamand	2018-19	0	13.9444	1.59845	3439.75			Rajsamand
	Rajsamand	2019-20	0.000725091	0.978613	0.0968427	347.624			Rajsamand	2019-20	9.59708	8.7749	2.29048	18506.2			Rajsamand	2019-20	1.11403	1.75491	0.124121	1052.87			Rajsamand	2019-20	0.955743	5.64755	1.33725	3665.11			Rajsamand	2019-20	0.0440796	8.69212	0.622206	2396.87			Rajsamand	2019-20	0	9.57534	0.96811	2423.33			Rajsamand
	Sawai Madhopur	2008-09	0	328.299	35.7809	79003.8			Sawai Madhopur	2008-09	1.46427	1.13401	0.352404	1854.82			Sawai Madhopur	2008-09	0	0	0	0			Sawai Madhopur	2008-09	4.35159	20.0622	4.59643	10107.6			Sawai Madhopur	2008-09	0.223072	30.5596	2.42157	5593.46			Sawai Madhopur	2008-09	0	7.25172	0.825521	1229.68			Sawai Madhopur
	Sawai Madhopur	2009-10	0.0956196	324.488	36.6905	81099.9			Sawai Madhopur	2009-10	1.40477	1.43674	0.386465	2206.7			Sawai Madhopur	2009-10	0	0.00220259	0.00013614	0.762995			Sawai Madhopur	2009-10	2.65508	44.7448	9.16267	21385.4			Sawai Madhopur	2009-10	0.993032	49.4293	2.5354	4166.85			Sawai Madhopur	2009-10	0	2.06081	0.201556	316.769			Sawai Madhopur
	Sawai Madhopur	2010-11	0.00201778	593.574	60.3009	127191			Sawai Madhopur	2010-11	2.04728	2.63745	0.707593	3904.28			Sawai Madhopur	2010-11	0	0	0	0			Sawai Madhopur	2010-11	2.95866	45.4359	11.127	21355.6			Sawai Madhopur	2010-11	0.45439	40.0654	3.29975	6433.09			Sawai Madhopur	2010-11	0	3.12876	0.321676	561.025			Sawai Madhopur
	Sawai Madhopur	2011-12	0.00263217	369.805	39.7807	95027.8			Sawai Madhopur	2011-12	1.78523	1.5304	0.48662	2604.38			Sawai Madhopur	2011-12	0	0.0203622	0.00144799	7.62995			Sawai Madhopur	2011-12	2.87938	25.6525	7.16001	13986.7			Sawai Madhopur	2011-12	0.0182653	42.0445	3.31782	8154.33			Sawai Madhopur	2011-12	0	4.05194	0.43225	715.975			Sawai Madhopur
	Sawai Madhopur	2012-13	0	381.175	49.3397	86376.6			Sawai Madhopur	2012-13	1.80787	1.4861	0.593617	2604.38			Sawai Madhopur	2012-13	0.00305855	0.0229364	0.0021085	9.15594			Sawai Madhopur	2012-13	7.27965	36.6396	12.7174	17077.3			Sawai Madhopur	2012-13	0.213254	35.1098	3.36083	5752.99			Sawai Madhopur	2012-13	0	19.8853	2.77157	3799.71			Sawai Madhopur
	Sawai Madhopur	2013-14	0	322.928	40.3974	77148.3			Sawai Madhopur	2013-14	1.17753	1.11299	0.463248	2022.74			Sawai Madhopur	2013-14	0	0.00388726	0.000348426	1.52599			Sawai Madhopur	2013-14	5.04534	24.0936	9.06659	14552.3			Sawai Madhopur	2013-14	0.105378	37.3919	3.72744	6936.11			Sawai Madhopur	2013-14	0	71.2515	9.53055	11867			Sawai Madhopur
	Sawai Madhopur	2014-15	0	566.525	70.5104	78769.5			Sawai Madhopur	2014-15	1.03581	0.823162	0.323876	1463.25			Sawai Madhopur	2014-15	0.0015353	0.00141216	0.000160845	0.762995			Sawai Madhopur	2014-15	4.36681	19.8423	6.94291	10013			Sawai Madhopur	2014-15	0.321598	26.801	2.74188	4016.48			Sawai Madhopur	2014-15	0	19.5638	2.48256	3243.26			Sawai Madhopur
	Sawai Madhopur	2015-16	0.0681344	303.802	47.0095	73211.2			Sawai Madhopur	2015-16	0.897607	0.637759	0.276702	1131.21			Sawai Madhopur	2015-16	0	0.00188758	0.000188798	0.762995			Sawai Madhopur	2015-16	6.68994	17.1963	5.85269	9345.08			Sawai Madhopur	2015-16	1.032	16.4323	1.89699	2996.72			Sawai Madhopur	2015-16	0	30.7357	4.554	4900.39			Sawai Madhopur
	Sawai Madhopur	2016-17	0	352.113	51.6245	88342.1			Sawai Madhopur	2016-17	1.06159	0.771653	0.333947	1354.09			Sawai Madhopur	2016-17	0	0	0	0			Sawai Madhopur	2016-17	18.9015	37.3238	13.1804	21712.8			Sawai Madhopur	2016-17	0.17869	17.6095	2.03335	3276.85			Sawai Madhopur	2016-17	0	14.9972	2.34127	2741.01			Sawai Madhopur
	Sawai Madhopur	2017-18	0	330.944	45.6437	74957.6			Sawai Madhopur	2017-18	0.896161	0.630152	0.256294	1128.92			Sawai Madhopur	2017-18	0.00167748	0.00281456	0.000319636	1.42737			Sawai Madhopur	2017-18	51.1671	72.6697	23.8764	44933.9			Sawai Madhopur	2017-18	0.86812	10.5055	1.17708	1864.74			Sawai Madhopur	2017-18	0	6.47045	0.918765	1031.22			Sawai Madhopur
	Sawai Madhopur	2018-19	0	343.744	34.0466	76294.9			Sawai Madhopur	2018-19	0.911529	0.713954	0.221488	1345.7			Sawai Madhopur	2018-19	0	0	0	0			Sawai Madhopur	2018-19	46.9773	82.9502	23.3859	50992.3			Sawai Madhopur	2018-19	0.0633028	12.6225	0.995789	2446.38			Sawai Madhopur	2018-19	0	5.69344	0.592571	1117.47			Sawai Madhopur
	Sawai Madhopur	2019-20	0	402.21	50.4948	103143			Sawai Madhopur	2019-20	0.765492	0.701003	0.291719	1359.44			Sawai Madhopur	2019-20	0	0	0	0			Sawai Madhopur	2019-20	72.4465	158.502	65.8642	68671			Sawai Madhopur	2019-20	0.0691771	13.8011	1.34125	2695.98			Sawai Madhopur	2019-20	0	3.62659	0.477411	698.419			Sawai Madhopur
	Tonk	2008-09	0.0220242	262.411	20.1281	70055.2			Tonk	2008-09	9.96989	7.25746	1.41929	11490.2			Tonk	2008-09	0.0464427	0.0631466	0.00397851	32.8938			Tonk	2008-09	2.32193	37.2233	5.21495	16668.8			Tonk	2008-09	0.238441	84.1218	4.83248	16415			Tonk	2008-09	0	22.5134	1.78667	4004.31			Tonk
	Tonk	2009-10	0.597712	210.897	14.8603	33672.3			Tonk	2009-10	7.12114	5.27908	0.921397	8802.15			Tonk	2009-10	0.303501	0.22836	0.0146397	142.853			Tonk	2009-10	0.513366	11.5706	1.42463	5220.93			Tonk	2009-10	0.749635	57.9575	3.59097	7798.96			Tonk	2009-10	0	7.17638	0.476169	1186.53			Tonk
	Tonk	2010-11	0	464.116	23.5175	103221			Tonk	2010-11	18.6972	33.1066	3.74042	42929.5			Tonk	2010-11	0.0860287	0.102224	0.00460277	56.3894			Tonk	2010-11	1.83936	98.8426	10.8195	44387.8			Tonk	2010-11	0.180497	115.48	4.97026	18510.7			Tonk	2010-11	0	7.30466	0.374252	1342.61			Tonk
	Tonk	2011-12	0	204.237	16.4356	57607			Tonk	2011-12	16.7581	14.074	2.92104	22685.1			Tonk	2011-12	0.582514	0.797566	0.0514119	425.74			Tonk	2011-12	6.40871	118.989	21.3397	57666.2			Tonk	2011-12	0.086226	94.6155	5.65992	19978.3			Tonk	2011-12	0	10.9253	0.867618	2091			Tonk
	Tonk	2012-13	0.00382798	214.229	19.3541	49828.7			Tonk	2012-13	14.3377	12.3813	2.86139	19935.1			Tonk	2012-13	1.31964	1.42381	0.105925	789.452			Tonk	2012-13	11.6422	161.032	30.3897	66238			Tonk	2012-13	0.209209	84.711	6.52859	13360.2			Tonk	2012-13	0	21.9923	2.06882	4388.85			Tonk
	Tonk	2013-14	0.00224604	198.085	18.6215	50205.7			Tonk	2013-14	9.80811	8.83584	2.44097	15220.9			Tonk	2013-14	0.689195	1.02331	0.0803047	520.662			Tonk	2013-14	6.7207	120.428	28.3884	63961.8			Tonk	2013-14	0.162735	90.0037	6.69714	17030.8			Tonk	2013-14	0	64.3524	6.37338	10786			Tonk
	Tonk	2014-15	0	437.012	45.7057	57424.6			Tonk	2014-15	6.1422	5.03942	1.42711	8555.82			Tonk	2014-15	1.50676	1.29119	0.118917	749.04			Tonk	2014-15	5.52587	78.7323	19.2283	35661.8			Tonk	2014-15	0.306895	67.81	5.57433	9346.53			Tonk	2014-15	0	17.6204	1.72939	3008.64			Tonk
	Tonk	2015-16	0.634488	189.658	16.275	47001.5			Tonk	2015-16	7.88021	5.19568	1.2645	9183.87			Tonk	2015-16	0.875194	0.856758	0.0681615	506.565			Tonk	2015-16	12.702	36.4372	6.80964	18501.3			Tonk	2015-16	0.334683	50.1617	3.39768	9265.67			Tonk	2015-16	0	24.466	2.15518	4148.16			Tonk
	Tonk	2016-17	0.00327224	239.808	22.1516	61226.8			Tonk	2016-17	11.2768	8.06368	2.01915	14349.3			Tonk	2016-17	0.754459	0.831987	0.0681043	493.088			Tonk	2016-17	23.2904	83.9517	16.3268	45230.2			Tonk	2016-17	0.170035	67.5779	5.09576	11992.3			Tonk	2016-17	0	22.4715	2.13785	4186.71			Tonk
	Tonk	2017-18	0.00191387	216.242	18.834	60043.1			Tonk	2017-18	8.02198	5.44976	1.29166	9933.21			Tonk	2017-18	1.05035	1.17477	0.0883976	691.921			Tonk	2017-18	86.0841	176.193	32.7028	101500			Tonk	2017-18	0.0842791	53.3182	3.51664	10652.5			Tonk	2017-18	0	19.842	1.69279	3566.18			Tonk
	Tonk	2018-19	0	215.592	14.086	58912.9			Tonk	2018-19	5.52589	3.83063	0.704748	6940.56			Tonk	2018-19	0.60525	0.686499	0.0392528	406.138			Tonk	2018-19	60.8187	196.322	30.8844	99988.4			Tonk	2018-19	0.107795	96.002	5.02794	19027.8			Tonk	2018-19	0	16.8147	1.1323	3427.03			Tonk
	Tonk	2019-20	0	237.362	14.5134	63325.3			Tonk	2019-20	8.80123	7.50635	1.43012	15167.3			Tonk	2019-20	0.426194	0.509923	0.0260599	293.295			Tonk	2019-20	86.0724	309.792	59.3914	146815			Tonk	2019-20	0.00568017	109.407	5.21546	24527			Tonk	2019-20	0	6.80474	0.411223	1367.05			Tonk
	Udaipur	2008-09	0	0.0133667	0.00147886	3.6774			Udaipur	2008-09	3.62208	2.62664	0.65026	3801.61			Udaipur	2008-09	0.0779487	0.200498	0.0163906	96.7995			Udaipur	2008-09	0.69945	8.88129	1.55735	3565.03			Udaipur	2008-09	0.00102926	7.76985	0.696139	1390.47			Udaipur	2008-09	0	22.6891	2.57876	4314.41			Udaipur
	Udaipur	2009-10	0	0.0545892	0.00489469	12.6666			Udaipur	2009-10	2.98784	2.19805	0.492068	3226.71			Udaipur	2009-10	0.109158	0.234788	0.0163827	106.602			Udaipur	2009-10	0.61594	4.80059	0.753348	1998.46			Udaipur	2009-10	0	5.02831	0.345354	913.63			Udaipur	2009-10	0	11.2257	1.0428	1946.98			Udaipur
	Udaipur	2010-11	0	0.0385572	0.00393275	9.8064			Udaipur	2010-11	3.5587	4.0419	0.894864	5237.43			Udaipur	2010-11	0.236434	0.334428	0.0284592	172.36			Udaipur	2010-11	0.586263	15.7725	2.70306	6130.63			Udaipur	2010-11	0.00565401	4.44054	0.342367	822.512			Udaipur	2010-11	0	26.9536	2.75755	4951.41			Udaipur
	Udaipur	2011-12	0	0.0346047	0.00433471	7.7634			Udaipur	2011-12	8.77363	6.46594	2.24708	10025.4			Udaipur	2011-12	0.73882	1.23915	0.132261	613.063			Udaipur	2011-12	1.09831	10.2978	2.69544	4469.68			Udaipur	2011-12	0.0690163	6.8842	0.681957	1305.07			Udaipur	2011-12	0	17.4136	2.31223	3187.08			Udaipur
	Udaipur	2012-13	0	0.0122778	0.00164646	3.2688			Udaipur	2012-13	7.64313	5.36427	1.77106	8217.35			Udaipur	2012-13	1.05121	1.16516	0.13424	640.02			Udaipur	2012-13	1.197	8.52694	2.00269	3533.16			Udaipur	2012-13	0.0729876	5.3223	0.555277	1013.33			Udaipur	2012-13	0	15.4961	2.30551	3191.57			Udaipur
	Udaipur	2013-14	0	0.277379	0.0425804	61.6986			Udaipur	2013-14	7.39577	5.62778	2.41192	9028.02			Udaipur	2013-14	0.52456	1.04034	0.127785	492.166			Udaipur	2013-14	0.769333	12.5294	3.92951	5541.02			Udaipur	2013-14	0.00896644	4.88957	0.585644	946.726			Udaipur	2013-14	0	30.9686	4.87046	5387.39			Udaipur
	Udaipur	2014-15	0	0.0206115	0.00222112	3.6774			Udaipur	2014-15	7.88527	5.50028	1.64913	8730.15			Udaipur	2014-15	0.787648	1.06711	0.104479	553.432			Udaipur	2014-15	0.944162	9.25487	2.02168	3955.25			Udaipur	2014-15	0.0198823	6.713	0.617079	970.016			Udaipur	2014-15	0	21.1453	2.45889	3946.67			Udaipur
	Udaipur	2015-16	0	0.0348451	0.00636697	8.172			Udaipur	2015-16	9.81234	6.38415	2.72467	10320.4			Udaipur	2015-16	0.392492	0.538716	0.072873	278.145			Udaipur	2015-16	1.67527	8.95769	2.72329	3896.82			Udaipur	2015-16	0.00504167	2.01408	0.269352	396.751			Udaipur	2015-16	0	19.3769	3.40141	3377.08			Udaipur
	Udaipur	2016-17	0	0.0342711	0.00525813	8.5806			Udaipur	2016-17	9.02001	6.09581	2.52006	10108.8			Udaipur	2016-17	0.184778	0.335653	0.0421556	167.751			Udaipur	2016-17	1.544	11.1573	3.22432	5068.68			Udaipur	2016-17	0.0111973	2.79853	0.326808	561.008			Udaipur	2016-17	0	14.1315	2.33115	2772.35			Udaipur
	Udaipur	2017-18	0	0.0505752	0.00817784	13.8924			Udaipur	2017-18	8.09882	5.39118	2.25023	9152.23			Udaipur	2017-18	0.178377	0.336327	0.0424148	171.154			Udaipur	2017-18	1.55813	9.79732	2.80879	4594.71			Udaipur	2017-18	0.0170219	2.2979	0.269228	449.46			Udaipur	2017-18	0	19.224	3.14498	3612.02			Udaipur
	Udaipur	2018-19	0	0.0533276	0.00644018	13.0752			Udaipur	2018-19	7.74012	5.17207	1.60848	8363.63			Udaipur	2018-19	0.381934	0.58488	0.0601529	322.79			Udaipur	2018-19	2.4639	10.8626	2.56527	4950.6			Udaipur	2018-19	0	2.68736	0.234905	509.524			Udaipur	2018-19	0	24.0759	3.1113	4842.73			Udaipur
	Udaipur	2019-20	0	0.0855002	0.0113403	24.1074			Udaipur	2019-20	7.17825	5.82047	2.13472	10277.1			Udaipur	2019-20	0.438469	0.832194	0.0816946	414.271			Udaipur	2019-20	2.02689	11.7721	3.84735	6150.66			Udaipur	2019-20	0	1.65708	0.160064	367.74			Udaipur	2019-20	0	7.01423	0.944579	1410.9			Udaipur
[truncated: 68 more columns]

## Sheet: Sector Wise WF (MCM_per_year)
𝑊𝐹𝑏𝑎𝑠𝑖𝑛 = 𝑊𝐹𝑎𝑔𝑟𝑖𝑐𝑢𝑙𝑡𝑟𝑒 + 𝑊𝐹𝑙𝑖𝑣𝑒𝑠𝑡𝑜𝑐𝑘𝑠 + 𝑊𝐹𝑑𝑜𝑚𝑒𝑠𝑡𝑖𝑐 + 𝑊𝐹𝑖𝑛𝑑𝑢𝑠𝑡𝑟𝑦 + 𝑊𝐹𝑤𝑖𝑙𝑑𝑙𝑖𝑓𝑒 + 𝑊𝐹𝑓𝑜𝑟𝑒𝑠𝑡𝑟𝑦 + 𝑊𝐹𝑒𝑛𝑒𝑟𝑔𝑦
		Sector Wise WF (MCM/yr)											Sector Wise WF (MCM/yr)														Agriculture WF (MCM/yr)
	Sno	District	Agriculture	Domestic	Industries	Livestock	Energy	Wildlife	Forests	Total			Year	Agriculture	Domestic	Industries	Livestock	Energy	Wildlife	Forests							Year	WF blue	WF green	WF grey	WF Total
	1	Ajmer	1514.64	77.4261	3.78719	13.2285		0.0865937	0.0519752	1609.22			2008-09	15878.7	470.474	106.755	141.633	39.9855	1.03302	1.62712							2008-09	2930.76	11732.3	1215.62	15878.7
	2	Bhilwara	2552	70.9251	8.37659	22.3179		0.20075	0.102048	2653.92			2009-10	11365.8	499.729	109.832	142.576	47.1039	1.0398	1.63705							2009-10	2427.96	8023.96	913.901	11365.8
	3	Bundi	427.125	4.89295	0.061944	1.96954		0.0027416	0.0350227	434.087			2010-11	21027.5	528.984	112.908	143.518	54.2222	1.04659	1.64698							2010-11	3352.64	16143.3	1531.51	21027.5
	4	Chittaurgarh	2860.63	41.8037	25.9305	19.6489	79.1365	0.17126	0.250411	3027.57			2011-12	18535.4	558.239	115.985	144.461	61.3406	1.05338	1.65691							2011-12	3870.02	13093.2	1572.15	18535.4
	5	Dausa	1656.65	31.648	0.639021	9.47554		0.0630407	0.0381882	1698.52			2012-13	20626.8	587.494	119.062	145.404	68.459	1.06017	1.66684							2012-13	4457.34	14180.7	1988.75	20626.8
	6	Jaipur	3557.14	233.158	65.4892	27.1706		0.180114	0.135165	3883.27			2013-14	19414.8	616.749	122.139	146.346	75.5773	1.06696	1.67677							2013-14	3724.8	13762.2	1927.72	19414.8
	7	Karauli	720.79	12.7898	0.2076	3.96341		0.0115969	0.101049	737.863			2014-15	20676.5	646.004	125.216	147.289	82.6957	1.07375	1.6867							2014-15	3535.53	15177.7	1963.3	20676.5
	8	Pratapgarh	408.566	5.48295	0.0269178	3.90004		0.00950049	0.11867	418.104			2015-16	16092.7	675.259	128.293	148.232	89.814	1.08054	1.69663							2015-16	4030.93	10584.9	1476.88	16092.7
	9	Rajsamand	562.233	33.9842	8.93012	12.384		0.112992	0.113548	617.758			2016-17	21024.3	704.514	131.369	149.174	96.9324	1.08733	1.70656							2016-17	5046.15	13932.5	2045.63	21024.3
	10	Sawai Madhopur	1737.2	32.8597	0.704908	7.62613		0.0582103	0.168346	1778.61			2017-18	20543.7	733.769	134.446	150.117	104.051	1.09411	1.71649							2017-18	4484.61	14107.4	1951.72	20543.7
	11	Tonk	2573.85	44.4118	1.55415	13.3297		0.125326	0.0630404	2633.33			2018-19	22736.7	763.024	137.523	151.06	111.169	1.1009	1.72643							2018-19	4497.96	16364.4	1874.34	22736.7
	12	Udaipur	683.714	41.9947	7.96913	11.8034		0.0482288	0.504274	746.034			2019-20	23131.5	792.279	140.6	152.002	118.287	1.10769	1.73636							2019-20	4947.1	15601.7	2582.7	23131.5

## Sheet: Observed_field_data
	Irrigated area		Bajra	Barley	Cotton	Gram	Groundnut	Guar	Jowar/Sorghum	Lentil/Masoor	Maize	Moong/Mungbean	Rape & M	Rice/Paddy	Sesame	Soyabean	Urad/Black Gram	Wheat			Rainfed area		Bajra	Barley	Cotton	Gram	Groundnut	Guar	Jowar/Sorghum	Lentil/Masoor	Maize	Moong/Mungbean	Rape & M	Rice/Paddy	Sesame	Soyabean	Urad/Black Gram	Wheat			Total area		Bajra	Barley	Cotton	Gram	Groundnut	Guar	Jowar/Sorghum
	District	Year	Irrigated area	Irrigated area	Irrigated area	Irrigated area	Irrigated area	Irrigated area	Irrigated area	Irrigated area	Irrigated area	Irrigated area	Irrigated area	Irrigated area	Irrigated area	Irrigated area	Irrigated area	Irrigated area			District	Year	Rainfed area	Rainfed area	Rainfed area	Rainfed area	Rainfed area	Rainfed area	Rainfed area	Rainfed area	Rainfed area	Rainfed area	Rainfed area	Rainfed area	Rainfed area	Rainfed area	Rainfed area	Rainfed area			District	Year	Rainfed area	Rainfed area	Rainfed area	Rainfed area	Rainfed area	Rainfed area	Rainfed area
			(ha)	(ha)	(ha)	(ha)	(ha)	(ha)	(ha)	(ha)	(ha)	(ha)	(ha)	(ha)	(ha)	(ha)	(ha)	(ha)					(ha)	(ha)	(ha)	(ha)	(ha)	(ha)	(ha)	(ha)	(ha)	(ha)	(ha)	(ha)	(ha)	(ha)	(ha)	(ha)					(ha)	(ha)	(ha)	(ha)	(ha)	(ha)	(ha)
	Ajmer	2008-09	41.8944	4672.53	3360.06	274.277	489.641	0	12.4374	0	789.448	0	8066.64	2.6184	7.2006	10.4736	0	10499.1			Ajmer	2008-09	54488.9	484.404	782.247	13330.3	1231.3	6570.87	93790.4	4.5822	22606	48437.8	6113.31	0	16818	8.5098	6035.41	370.504			Ajmer	2008-09	54530.8	5156.94	4142.31	13604.6	1720.94	6570.87	93802.9
	Ajmer	2009-10	17.0196	2552.29	3163.03	26.8386	547.246	0	7.8552	0	445.783	0	1528.49	2.6184	0	0	0	5682.58			Ajmer	2009-10	55845.2	22.2564	1059.14	76.5882	1017.25	5651.82	96274.6	1.3092	22644.6	51697.7	341.701	1.9638	16658.9	13.7466	6014.46	52.368			Ajmer	2009-10	55862.3	2574.54	4222.17	103.427	1564.49	5651.82	96282.5
	Ajmer	2010-11	13.7466	15588	1684.29	907.276	632.344	0	8.5098	0	234.347	0	7550.16	0	0	0	0	37352.8			Ajmer	2010-11	61729.4	12118.6	463.457	71840.4	696.494	4173.07	104976	16.365	22950.9	54598.9	8658.39	5.8914	13956.7	6.546	5799.76	4752.4			Ajmer	2010-11	61743.2	27706.6	2147.74	72747.7	1328.84	4173.07	104984
	Ajmer	2011-12	1.3092	9991.81	6241.61	724.642	803.194	0	0	0	131.575	0	12976.1	1.9638	0	1.3092	0	29022.3			Ajmer	2011-12	48801.7	1410.66	1394.3	56678.5	941.315	3500.15	76122.8	18.3288	21093.2	86337.8	4660.75	3.9276	14100.1	0	15497.7	1449.28			Ajmer	2011-12	48803	11402.5	7635.91	57403.2	1744.51	3500.15	76122.8
	Ajmer	2012-13	3.9276	15228.6	10262.8	1898.99	744.28	0	9.819	0	241.547	0	22055.4	0	0	0	0	42044.3			Ajmer	2012-13	46137.5	1723.56	10158.1	57057.6	1065.69	13036.4	88424.7	3.273	19055.4	61205.8	4764.18	3.273	10793.7	0.6546	13156.8	1176.97			Ajmer	2012-13	46141.4	16952.2	20420.9	58956.5	1809.97	13036.4	88434.5
	Ajmer	2013-14	22.911	14074.6	9106.8	1582.82	889.601	0	2.6184	0	250.712	0	26197.7	0	0	0	0	35697.3			Ajmer	2013-14	44428.4	1980.16	894.184	107747	805.813	29155.9	90738.7	5.8914	19022.7	51885.6	8230.94	3.273	7079.5	8.5098	14356.7	960.298			Ajmer	2013-14	44451.3	16054.7	10001	109330	1695.41	29155.9	90741.3
	Ajmer	2014-15	43.2036	15044.7	10935.7	1296.11	741.662	0	6.546	0	427.454	0	25935.9	1.9638	0	5.2368	0	39900.5			Ajmer	2014-15	45414.2	1012.67	379.668	52867.5	622.525	19160.1	89906.7	39.276	17465.4	56640.6	4083.39	3.9276	5986.32	9.819	12771.9	974.045			Ajmer	2014-15	45457.4	16057.3	11315.4	54163.6	1364.19	19160.1	89913.2
	Ajmer	2015-16	157.104	10912.2	9175.53	2069.19	783.556	0	17.0196	0	892.874	0	24576.3	0	0.6546	1.9638	0	27353.1			Ajmer	2015-16	39935.8	606.814	252.676	10819.9	765.227	21525.2	96421.3	43.2036	16392.5	58263.3	1155.37	1.3092	5659.67	10.4736	16699.5	332.537			Ajmer	2015-16	40092.9	11519	9428.2	12889.1	1548.78	21525.2	96438.3
	Ajmer	2016-17	4.5822	13884.1	6427.52	3028.18	568.847	0	10.4736	0	500.114	0	26876.6	1.3092	0	0	0	35611.5			Ajmer	2016-17	40393.4	628.416	21.6018	94743.5	623.834	13008.2	94224.4	46.4766	16399	68860	5415.51	3.273	4618.2	0.6546	20915.8	696.494			Ajmer	2016-17	40398	14512.5	6449.12	97771.7	1192.68	13008.2	94234.9
	Ajmer	2017-18	0	10143	7837.53	4323.63	408.47	0	0	0	487.677	0	14911.8	0	0	0	0	26159.1			Ajmer	2017-18	38292.1	85.098	54.9864	39006.3	562.301	10785.8	83032.7	7.2006	14807.7	70871.6	689.948	5.8914	4315.78	0.6546	36455.3	239.584			Ajmer	2017-18	38292.1	10228.1	7892.51	43329.9	970.772	10785.8	83032.7
	Ajmer	2018-19	5.8914	8924.16	6952.51	2135.31	308.317	0	0.6546	0	276.241	0	16981	0	0	0	0	22566			Ajmer	2018-19	40240.2	152.522	98.19	57650.6	505.351	8835.79	88118.3	5.2368	14574.7	79268.1	1334.73	3.9276	4115.47	0.6546	28048.3	205.544			Ajmer	2018-19	40246.1	9076.68	7050.7	59785.9	813.668	8835.79	88119
	Ajmer	2019-20	20.2926	18442	6420.97	4833.57	140.739	0	5.2368	0	143.357	0	23388.9	0	0	0	0	49883.8			Ajmer	2019-20	40431.4	473.276	166.268	108837	642.163	8100.67	99831.1	7.8552	14568.8	75663.9	1682.98	1.9638	6602.95	1.9638	19875	338.428			Ajmer	2019-20	40451.7	18915.3	6587.24	113671	782.902	8100.67	99836.3
	Bhilwara	2008-09	0.8995	8350.96	11465	2864.91	140.322	0	0.8995	0	1888.05	0	31634.5	246.463	9.8945	10.794	0	48458.8			Bhilwara	2008-09	2445.74	133.126	2881.1	14175.2	9078.65	21986.5	25385.7	3883.14	159765	14097.9	7960.57	3.598	31129.9	3268.78	37404.8	451.549			Bhilwara	2008-09	2446.64	8484.08	14346.1	17040.1	9218.98	21986.5	25386.6
	Bhilwara	2009-10	0	5947.49	8446.31	975.957	49.4725	0	0	0	1369.94	0	8226.83	385.886	0	12.593	0	34404.1			Bhilwara	2009-10	2848.72	48.573	12547.1	1342.05	7655.64	11991.2	36052	3866.05	167070	14354.2	420.966	0.8995	26046.8	3117.67	36800.3	122.332			Bhilwara	2009-10	2848.72	5996.07	20993.4	2318.01	7705.12	11991.2	36052
	Bhilwara	2010-11	0	24140.8	6595.13	2551.88	175.403	0	0.8995	0	1382.53	0	19795.3	349.906	0	125.031	0	105780			Bhilwara	2010-11	4591.95	2739.88	5016.51	42502.3	6047.34	6812.81	48784.4	5571.5	180612	18585.5	9195.59	2.6985	24873	2230.76	33013.4	1062.31			Bhilwara	2010-11	4591.95	26880.7	11611.6	45054.2	6222.74	6812.81	48785.3
	Bhilwara	2011-12	0	19824.1	22719.6	2599.55	51.2715	0	6.2965	0	87.2515	0	21541.2	322.021	8.995	0.8995	0	97742.4			Bhilwara	2011-12	2592.36	775.369	12327.6	23755.8	6421.53	5611.08	33046.7	5499.54	153290	18064.7	4300.51	7.196	30539.8	5074.08	57377.3	825.741			Bhilwara	2011-12	2592.36	20599.4	35047.2	26355.3	6472.8	5611.08	33053
	Bhilwara	2012-13	0	22083.6	34079.4	3509.85	358.901	0	0	0	17.99	0	32668	229.373	0	0	0	109134			Bhilwara	2012-13	1888.95	314.825	11591	22795.1	5756.8	26270.8	31759.5	5191.01	140421	12918.6	5240.49	0	21151.7	6202.95	50103.9	412.871			Bhilwara	2012-13	1888.95	22398.4	45670.3	26305	6115.7	26270.8	31759.5
	Bhilwara	2013-14	0	22754.7	28052.7	3258.89	247.363	0	0	0	374.192	0	39496.1	262.654	0	8.995	0	111533			Bhilwara	2013-14	1821.49	262.654	7458.65	37883.3	6120.2	52519.1	29706	5771.19	137796	9251.36	15988.6	0	15451.6	8185.45	45055.1	424.564			Bhilwara	2013-14	1821.49	23017.3	35511.4	41142.2	6367.56	52519.1	29706
	Bhilwara	2014-15	0	22895	35078.7	3360.53	128.629	0	2.6985	0	1047.02	0	31726.3	446.152	3.598	259.056	0	123136			Bhilwara	2014-15	1890.75	138.523	5723.52	20614.7	5505.84	28129.2	29075.4	8828.59	136633	11912.1	5122.65	14.392	11480.3	10434.2	48097.2	296.835			Bhilwara	2014-15	1890.75	23033.5	40802.2	23975.3	5634.47	28129.2	29078.1
	Bhilwara	2015-16	0	14936.2	35443	4496.6	761.877	0	7.196	0	12484.2	0	27615.5	503.72	0.8995	1190.94	0	80515.1			Bhilwara	2015-16	1951.91	32.382	4481.31	6526.77	6220.04	25176.1	38713.6	14653.8	133953	17190.3	1547.14	5.397	12132.5	9209.08	63842.9	116.036			Bhilwara	2015-16	1951.91	14968.6	39924.3	11023.4	6981.92	25176.1	38720.8
	Bhilwara	2016-17	0	23610.1	25365.9	7839.14	170.005	0	2.6985	0	349.006	0	32397.3	426.363	1.799	44.975	0	125641			Bhilwara	2016-17	1996.89	56.6685	2899.09	22213.2	8270.9	16088.5	40611.5	10686.1	155334	19052.3	3215.71	36.8795	10003.3	4390.46	68604.9	104.342			Bhilwara	2016-17	1996.89	23666.7	28265	30052.3	8440.91	16088.5	40614.2
	Bhilwara	2017-18	0	19208.8	34183.7	16551.7	198.79	0	4.4975	0	2507.81	0	17994.5	487.529	2.6985	16.191	0	92420.9			Bhilwara	2017-18	2073.35	4.4975	3115.87	14050.2	7984.86	10725.6	36292.1	6119.3	140459	12630.8	1479.68	30.583	9057.97	4768.25	90129	49.4725			Bhilwara	2017-18	2073.35	19213.3	37299.6	30601.9	8183.65	10725.6	36296.6
	Bhilwara	2018-19	0	17159.8	34820.5	23679.3	27.8845	0	0	0	848.229	0	26456.1	424.564	1.799	0	0	82045.2			Bhilwara	2018-19	2022.08	42.2765	3267.88	23865.5	9797.35	8225.03	49832.3	3563.82	138885	12857.5	2997.13	46.774	8125.18	4396.76	69940.6	22.4875			Bhilwara	2018-19	2022.08	17202	38088.4	47544.9	9825.24	8225.03	49832.3
	Bhilwara	2019-20	0	23294.4	35624.7	25205.8	65.6635	0	0	0	57.568	0	27261.1	411.072	0	0	0	131070			Bhilwara	2019-20	2657.12	161.91	4356.28	46505.9	10666.3	5496.84	61703.9	2989.94	154180	10969.4	3732.93	12.593	9647.14	4529.88	54641	304.031			Bhilwara	2019-20	2657.12	23456.3	39981	71711.7	10731.9	5496.84	61703.9
	Bundi	2008-09	0	103.426	1.2528	330.739	14.4768	0	0.1392	0	274.363	0	9567.08	3411.24	3.0624	3310.45	0	16385			Bundi	2008-09	356.074	1.8096	0.1392	368.323	55.8192	76.2816	160.776	834.226	4277.06	10.3008	2165.4	0	2582.58	7336.68	1583.82	14.0592			Bundi	2008-09	356.074	105.235	1.392	699.062	70.296	76.2816	160.915
	Bundi	2009-10	0	90.0624	0.4176	263.645	9.3264	0	0.1392	0	53.0352	0	5799.49	5030.83	0.4176	589.512	0	15010.8			Bundi	2009-10	442.934	2.3664	0.4176	698.366	50.808	14.1984	217.987	1739.44	5235.03	9.6048	3070.06	0.5568	2222.19	7130.66	1203.8	3.6192			Bundi	2009-10	442.934	92.4288	0.8352	962.011	60.1344	14.1984	218.126
	Bundi	2010-11	0	145.186	0.1392	396.302	7.7952	0	1.2528	0	110.803	0	4003.25	3185.04	0.1392	332.27	0	20911.5			Bundi	2010-11	679.435	4.176	0.2784	865.546	47.0496	120.965	91.872	2712.31	6655.99	32.8512	1799.86	2.3664	5068.55	7347.25	1893.82	2.5056			Bundi	2010-11	679.435	149.362	0.4176	1261.85	54.8448	120.965	93.1248
	Bundi	2011-12	0	194.462	5.4288	494.16	1.9488	0	0	0	0.9744	0	6345.85	2918.75	0	100.363	0	21692			Bundi	2011-12	337.699	0.8352	2.3664	316.541	67.3728	48.024	19.7664	1601.64	5712.21	23.2464	1071.28	0.8352	2781.49	10497.1	6057.43	0			Bundi	2011-12	337.699	195.298	7.7952	810.701	69.3216	48.024	19.7664
	Bundi	2012-13	0	179.707	10.44	486.922	1.9488	0	0	0	32.9904	0	8318.31	2688.23	0	102.869	0	21451.6			Bundi	2012-13	269.074	8.352	2.784	235.526	65.7024	92.568	13.7808	1030.78	5898.6	13.224	1003.49	0	1714.11	12240.6	5672.26	0.4176			Bundi	2012-13	269.074	188.059	13.224	722.448	67.6512	92.568	13.7808
	Bundi	2013-14	0	118.181	5.9856	203.789	7.0992	0	0	0	7.9344	0	9453.49	4101.25	0	20.7408	0	22311.7			Bundi	2013-14	190.704	1.392	2.088	76.4208	50.3904	538.286	9.4656	1201.3	4131.46	10.3008	348.557	0.2784	701.707	12366.5	4991.99	0			Bundi	2013-14	190.704	119.573	8.0736	280.21	57.4896	538.286	9.4656
	Bundi	2014-15	10.1616	100.363	7.9344	183.466	12.2496	0	0.1392	0	9.6048	0	7261.79	4809.08	0	99.2496	0	24080.3			Bundi	2014-15	213.115	0.4176	4.0368	42.5952	52.896	113.309	9.3264	2494.19	4746.58	10.8576	177.062	0	671.501	11665.7	5593.2	0			Bundi	2014-15	223.277	100.781	11.9712	226.061	65.1456	113.309	9.4656
	Bundi	2015-16	2.6448	100.085	6.4032	293.851	21.4368	0	0.8352	0	200.448	0	6985.06	5547.96	0	623.755	0	21564			Bundi	2015-16	186.25	0.5568	4.0368	34.2432	50.2512	119.851	12.6672	3556.98	3935.88	27.9792	92.1504	0	444.605	11465.9	8756.24	0			Bundi	2015-16	188.894	100.642	10.44	328.094	71.688	119.851	13.5024
	Bundi	2016-17	3.0624	144.629	15.5904	977.462	13.92	0	0.8352	0	85.8864	0	5382.86	6172.82	0	69.1824	0	22584.9			Bundi	2016-17	154.512	0.1392	9.1872	20.4624	47.8848	92.7072	22.4112	4395.66	4137.44	29.7888	26.0304	0	223.694	8857.3	12660.2	0			Bundi	2016-17	157.574	144.768	24.7776	997.925	61.8048	92.7072	23.2464
	Bundi	2017-18	0	262.67	29.7888	6706.8	13.0848	0	0	0	124.584	0	2848.03	6543.24	0	25.3344	0	20427.2			Bundi	2017-18	128.342	0.4176	7.656	336.307	40.7856	18.3744	13.7808	641.99	3069.22	10.7184	23.3856	0	140.731	3307.67	20058	0			Bundi	2017-18	128.342	263.088	37.4448	7043.1	53.8704	18.3744	13.7808
	Bundi	2018-19	0	222.581	0	3339.55	1.8096	0	0	0	21.576	0	8204.31	6989.65	0	1.2528	0	20539.9			Bundi	2018-19	155.347	0	41.064	80.8752	44.1264	13.5024	16.704	338.674	3285.68	16.2864	18.6528	0.696	136.834	3791.25	19419.9	0			Bundi	2018-19	155.347	222.581	41.064	3420.42	45.936	13.5024	16.704
	Bundi	2019-20	0	391.987	8.2128	3474.15	0.1392	0	0	0	7.7952	0	5773.18	8049.24	0	0	0	24296.7			Bundi	2019-20	224.669	0	0	38.8368	51.2256	27.7008	140.035	188.059	5596.68	5.2896	12.2496	0	194.88	6411.69	13488.8	0			Bundi	2019-20	224.669	391.987	8.2128	3512.99	51.3648	27.7008	140.035
	Chittaurgarh	2008-09	0	4803.39	1656.04	2920.73	1244.64	0	0	0	277.169	0	68913.1	318.134	0	40.9652	0	73251			Chittaurgarh	2008-09	28.7628	6.9728	754.806	3854.22	20556.7	4534.06	6523.05	565.668	144723	483.738	1709.21	3.4864	5852.79	39792.9	3784.49	2.6148			Chittaurgarh	2008-09	28.7628	4810.36	2410.85	6774.95	21801.3	4534.06	6523.05
	Chittaurgarh	2009-10	0	3858.57	4762.42	2472.73	163.861	0	0	0	168.219	0	33590.6	650.214	0	8.716	0	56717.6			Chittaurgarh	2009-10	10.4592	0	2724.62	1466.03	16263.2	3249.32	6664.25	371.302	152736	420.111	763.522	1.7432	5407.41	32389.5	3027.07	1.7432			Chittaurgarh	2009-10	10.4592	3858.57	7487.04	3938.76	16427	3249.32	6664.25
	Chittaurgarh	2010-11	1.7432	6037.57	3438.46	2287.95	665.031	0	0	0	32.2492	0	44652.1	726.914	0	11.3308	0	90778			Chittaurgarh	2010-11	11.3308	10.4592	1745.81	5396.95	16237.9	3273.73	7883.62	526.446	157079	664.159	1646.45	1.7432	5731.64	31640.8	3591.86	22.6616			Chittaurgarh	2010-11	13.074	6048.03	5184.28	7684.9	16902.9	3273.73	7883.62
	Chittaurgarh	2011-12	2.6148	6720.91	11738.7	2459.66	667.646	0	1.7432	0	57.5256	0	34739.4	447.131	0	26.148	0	95934.4			Chittaurgarh	2011-12	20.9184	0.8716	6609.34	2713.29	16223.1	2994.82	7321.44	609.248	133809	401.808	685.078	6.1012	6403.65	42408.6	5657.56	6.9728			Chittaurgarh	2011-12	23.5332	6721.78	18348.1	5172.95	16890.7	2994.82	7323.18
	Chittaurgarh	2012-13	0	6215.38	10099.2	2341.99	774.852	0	0	0	2.6148	0	46364.8	274.554	0	44.4516	0	97496.3			Chittaurgarh	2012-13	18.3036	0	5463.19	2898.94	14451.1	8071.02	8993.17	351.255	122162	372.173	791.413	1.7432	5367.31	58133.1	5513.74	0.8716			Chittaurgarh	2012-13	18.3036	6215.38	15562.4	5240.93	15226	8071.02	8993.17
	Chittaurgarh	2013-14	0	7003.31	8589.62	3105.51	509.014	0	0	0	66.2416	0	50477	271.939	17.432	598.789	0	108026			Chittaurgarh	2013-14	8.716	1.7432	2807.42	2749.03	14513.9	9711.37	9113.45	476.765	107962	334.694	1200.19	2.6148	3869.03	80604.7	4113.08	5.2296			Chittaurgarh	2013-14	8.716	7005.05	11397	5854.54	15022.9	9711.37	9113.45
	Chittaurgarh	2014-15	0	8675.91	9105.61	2698.47	530.804	0	5.2296	0	1271.66	0	29169.8	432.314	80.1872	1673.47	0	126163			Chittaurgarh	2014-15	22.6616	0	2264.42	1954.13	10569	7109.64	9023.67	965.733	90619.4	404.422	615.35	10.4592	2837.06	100202	3902.15	0			Chittaurgarh	2014-15	22.6616	8675.91	11370	4652.6	11099.8	7109.64	9028.9
	Chittaurgarh	2015-16	17.432	7992.57	8589.62	3080.23	1561.04	0	4.358	0	5625.31	0	40389.9	844.58	31.3776	5036.98	0	111666			Chittaurgarh	2015-16	33.1208	0	1251.62	1126.98	8579.16	7435.62	10715.5	1648.2	73022.6	407.037	306.803	5.2296	2348.09	120503	5021.29	0			Chittaurgarh	2015-16	50.5528	7992.57	9841.24	4207.21	10140.2	7435.62	10719.8
	Chittaurgarh	2016-17	0	8349.06	7221.21	4279.56	468.049	0	0	0	9.5876	0	35856.8	739.988	36.6072	14.8172	0	137609			Chittaurgarh	2016-17	196.982	0	1747.56	1847.79	14167.9	7522.78	11934.8	783.568	97097.1	458.462	220.515	6.9728	2065.69	103113	7105.28	0			Chittaurgarh	2016-17	196.982	8349.06	8968.76	6127.35	14635.9	7522.78	11934.8
	Chittaurgarh	2017-18	3.4864	8437.09	9463.83	11205.3	217.028	0	0	0	9.5876	0	30385.7	918.666	17.432	7.8444	0	133866			Chittaurgarh	2017-18	23.5332	0	990.138	3657.23	15983.4	5544.25	11614.9	650.214	93100.8	391.348	178.678	19.1752	1753.66	101636	10039.1	0			Chittaurgarh	2017-18	27.0196	8437.09	10454	14862.5	16200.4	5544.25	11614.9
	Chittaurgarh	2018-19	0	7236.02	12426.4	27428.4	68.8564	0	0	0	1.7432	0	34726.3	981.422	14.8172	10.4592	0	118871			Chittaurgarh	2018-19	57.5256	8.716	780.954	5868.48	22404.5	4663.93	13368.6	308.546	92932.6	501.17	273.682	77.5724	1290.84	92442.8	10935.1	0			Chittaurgarh	2018-19	57.5256	7244.74	13207.4	33296.9	22473.3	4663.93	13368.6
	Chittaurgarh	2019-20	0	8348.18	10081.8	33698.7	97.6192	0	0	0	61.012	0	12455.2	1004.08	21.79	1.7432	0	159211			Chittaurgarh	2019-20	88.9032	3.4864	479.38	7250.84	22095.1	4085.19	15097.9	192.624	106548	517.73	11.3308	21.79	983.165	89491.5	8477.18	0			Chittaurgarh	2019-20	88.9032	8351.67	10561.2	40949.5	22192.7	4085.19	15097.9
	Dausa	2008-09	3.9918	5630.43	11.9754	1156.96	3209.41	0	0	0	49.8975	0	47294.8	0	1.3306	0	0	51409.1			Dausa	2008-09	79549.3	2.6612	5.3224	3343.8	6557.86	7412.77	4051.01	0	867.551	147.031	9881.7	0	5762.83	0	3.9918	61.8729			Dausa	2008-09	79553.2	5633.1	17.2978	4500.75	9767.27	7412.77	4051.01
	Dausa	2009-10	218.218	5080.9	54.5546	1123.69	5561.24	0	3.9918	0	81.1666	0	41081.6	0	6.653	0	0	55827.3			Dausa	2009-10	91936.5	1.3306	12.6407	2928.65	4650.45	5508.68	6254.49	0	557.521	47.2363	11309.4	0	10496.4	0	3.9918	28.6079			Dausa	2009-10	92154.7	5082.23	67.1953	4052.34	10211.7	5508.68	6258.48
	Dausa	2010-11	0.6653	5102.85	11.9754	1097.08	3059.05	0	0.6653	0	13.306	0	34171.1	0	0	0	0	62819			Dausa	2010-11	93529.9	34.5956	0	5732.22	7866.51	4667.74	4975.11	0	442.425	58.5464	13188.9	0	8213.79	0	3.3265	21.9549			Dausa	2010-11	93530.5	5137.45	11.9754	6829.3	10925.6	4667.74	4975.78
	Dausa	2011-12	0	4527.37	7.9836	1292.68	2595.34	0	0	0	8.6489	0	37019.3	0	0	0	0	58454.6			Dausa	2011-12	92281.1	13.306	5.3224	6538.57	10147.8	3450.91	4123.53	0	548.872	76.5095	14234.8	0	7615.02	1.3306	23.9508	13.9713			Dausa	2011-12	92281.1	4540.67	13.306	7831.25	12743.2	3450.91	4123.53
	Dausa	2012-13	0	4832.74	15.9672	2062.43	2300.61	0	0	0	6.653	0	40480.8	0	0	0	0	60736.6			Dausa	2012-13	89476.9	13.306	3.9918	6332.99	8683.5	6244.51	3392.36	0	399.18	33.265	11378.6	0	6947.73	0.6653	11.3101	13.306			Dausa	2012-13	89476.9	4846.05	19.959	8395.42	10984.1	6244.51	3392.36
	Dausa	2013-14	0	4739.6	0.6653	2578.04	1975.94	0	0	0	2.6612	0	39052.4	0	0	0	0	63668.5			Dausa	2013-14	87526.2	3.3265	0	9658.83	7422.09	11731.9	3762.27	0	351.278	45.2404	10392.7	0	5374.96	0	1.9959	11.3101			Dausa	2013-14	87526.2	4742.92	0.6653	12236.9	9398.03	11731.9	3762.27
	Dausa	2014-15	1.9959	4511.4	2.6612	2466.27	1373.18	0	6.653	0	2.6612	0	34931.6	0	0	0	0	68949.7			Dausa	2014-15	90655.8	2.6612	0.6653	10120.5	7039.54	8281.65	3849.43	0	318.013	86.489	8127.3	0	5546.61	0	1.9959	4.6571			Dausa	2014-15	90657.8	4514.06	3.3265	12586.8	8412.72	8281.65	3856.08
	Dausa	2015-16	3.3265	3743.64	0.6653	2341.86	1808.95	0	0.6653	0	12.6407	0	34730.7	0	0	0	0	66271.2			Dausa	2015-16	97530.3	0	4.6571	5096.86	6336.98	9361.44	4078.95	0	280.091	25.9467	4869.33	0	7799.98	0	7.3183	1.3306			Dausa	2015-16	97533.6	3743.64	5.3224	7438.72	8145.93	9361.44	4079.62
	Dausa	2016-17	0	4239.29	0.6653	2632.59	178.966	0	0	0	7.3183	0	32390.8	0	0	0	0	68183.3			Dausa	2016-17	99493.6	0	3.9918	7117.38	6611.09	9316.2	3303.88	0.6653	223.541	45.2404	5027.01	0	5300.45	0.6653	25.9467	0			Dausa	2016-17	99493.6	4239.29	4.6571	9749.97	6790.05	9316.2	3303.88
	Dausa	2017-18	0	3667.8	3.9918	3010.48	272.773	0	0	0	3.3265	0	29782.2	0	0	0	0	60240.3			Dausa	2017-18	100219	1.3306	0	3415.65	5766.82	8096.7	2962.58	0	252.814	23.9508	2417.7	0	4943.18	0	20.6243	0			Dausa	2017-18	100219	3669.13	3.9918	6426.13	6039.59	8096.7	2962.58
	Dausa	2018-19	0	3110.28	2.6612	3581.98	391.862	0	0	0	1.3306	0	31974.3	0	0	0	0	57064.8			Dausa	2018-19	102410	0	0	7366.2	6537.9	6571.17	2675.17	0	222.21	17.2978	2490.22	0	4865.34	0	41.2486	0			Dausa	2018-19	102410	3110.28	2.6612	10948.2	6929.76	6571.17	2675.17
	Dausa	2019-20	0	3677.11	1.3306	4968.46	900.816	0	0	0	2.6612	0	32002.9	0	2.6612	0	0	56425.4			Dausa	2019-20	103156	0	0	10933.5	6481.35	5110.17	2915.34	0	287.41	8.6489	3416.32	0	5038.32	0	10.6448	15.9672			Dausa	2019-20	103156	3677.11	1.3306	15902	7382.17	5110.17	2915.34
	Jaipur	2008-09	14465.8	34010.7	37.7853	4155.72	24024.2	0	42.4256	0	757.032	0	54209.3	0	35.7966	0	0	90456.7			Jaipur	2008-09	181539	170.365	3.9774	15010	6622.37	39074.6	26872	0	2034.44	46857.7	37190.7	0	7686.33	0	396.414	220.746			Jaipur	2008-09	196005	34181.1	41.7627	19165.8	30646.5	39074.6	26914.4
	Jaipur	2009-10	14565.9	32832.1	68.2787	2757	23652.3	0	86.177	0	762.335	0	46584.6	0	27.8418	0	0	92287.6			Jaipur	2009-10	196692	35.7966	1.9887	1303.92	7514.63	36578.8	24795.8	0	1784.53	48412.2	19181	0	18219.8	0	277.755	5.3032			Jaipur	2009-10	211258	32867.9	70.2674	4060.93	31166.9	36578.8	24882
	Jaipur	2010-11	4448.06	39934.4	46.403	3573.03	22630.1	0	118.659	0	564.791	0	46216.1	0	25.8531	0	0	104306			Jaipur	2010-11	214744	3250.86	6.629	65702	7068.5	29353.2	26276	4.6403	1765.3	53493.4	40041.1	0	10919.3	0	196.218	1002.97			Jaipur	2010-11	219193	43185.3	53.032	69275	29698.6	29353.2	26394.7
	Jaipur	2011-12	3259.48	39163.5	51.0433	5871.31	23963.2	0	46.403	0	412.324	0	50516.3	0	29.8305	3.3145	0	97747.9			Jaipur	2011-12	207074	1078.54	11.2693	62953.6	9781.75	25475.2	17177.7	1.3258	1879.98	78026	35289.5	0	9575.59	0	353.326	411.661			Jaipur	2011-12	210334	40242	62.3126	68824.9	33744.9	25475.2	17224.1
	Jaipur	2012-13	3333.06	40725.3	114.682	6916.04	21684.8	0	55.0207	0	334.765	0	50851.7	0	12.5951	0	0	99763.1			Jaipur	2012-13	196534	810.064	3.9774	61525.1	7402.6	36832	18129.7	0.6629	1284.7	40191.6	29528.9	0	6930.62	0	266.486	395.751			Jaipur	2012-13	199867	41535.3	118.659	68441.1	29087.4	36832	18184.7
	Jaipur	2013-14	3268.1	39909.2	47.7288	5533.23	21018.6	0	29.1676	0	166.388	0	49173.9	0	14.5838	0	0	101522			Jaipur	2013-14	197564	927.397	0	90076.8	8917.33	43663.2	20587	5.9661	1610.18	60602.3	29790.1	0	5525.27	0	348.685	275.103			Jaipur	2013-14	200832	40836.6	47.7288	95610.1	29935.9	43663.2	20616.2
	Jaipur	2014-15	3630.7	39939.7	123.299	5352.25	19021.9	0	74.2448	0	224.06	0	47628.7	0	45.0772	0	0	104242			Jaipur	2014-15	193358	193.567	11.2693	73285.6	4895.52	39459.1	26758.6	0.6629	993.687	50552.8	28275.3	0	4194.83	0	352	263.834			Jaipur	2014-15	196989	40133.3	134.569	78637.8	23917.4	39459.1	26832.9
	Jaipur	2015-16	18221.8	37034.9	90.8173	4196.82	18706.4	0	59.661	0	131.254	0	47633.3	0	41.0998	0.6629	0	99529.1			Jaipur	2015-16	180717	40.4369	0.6629	5862.69	6621.05	44686.8	26685	6.629	1203.16	60821.7	9865.94	0	4649.58	1.3258	355.977	137.883			Jaipur	2015-16	198939	37075.3	91.4802	10059.5	25327.4	44686.8	26744.7
	Jaipur	2016-17	2218.06	37285.5	54.3578	5358.22	16917.9	0	32.4821	0	88.1657	0	44447.4	0	55.0207	0	0	104012			Jaipur	2016-17	199280	49.7175	5.3032	61053.8	5230.94	37378.3	24644.6	3.3145	994.35	70671.8	20815.1	0	3354.27	3.9774	789.514	216.768			Jaipur	2016-17	201498	37335.2	59.661	66412	22148.8	37378.3	24677.1
	Jaipur	2017-18	2851.8	34300.4	125.951	3455.03	16348.4	0	5.3032	0	200.196	0	38176.4	0	21.2128	0.6629	0	93404.6			Jaipur	2017-18	195076	8.6177	0.6629	14086.6	4987	34949.4	21666.2	0	861.107	81136.3	6798.7	0	2825.28	0	1926.39	0.6629			Jaipur	2017-18	197928	34309.1	126.614	17541.7	21335.4	34949.4	21671.5
	Jaipur	2018-19	1091.8	33352.5	275.103	3754.67	16231.1	0	7.2919	0	78.8851	0	41976.2	0	3.9774	0.6629	0	92423.5			Jaipur	2018-19	196582	17.2354	57.6723	49111.6	4371.83	29960.4	22836.9	76.8964	918.779	84026.6	14583.1	0	3101.05	0	1111.02	63.6384			Jaipur	2018-19	197673	33369.7	332.776	52866.3	20602.9	29960.4	22844.2
	Jaipur	2019-20	684.776	33805.2	422.267	8567.32	16987.5	0	31.1563	0	58.3352	0	44168.4	0	7.2919	0	0	95686.3			Jaipur	2019-20	199577	72.2561	7.2919	71721.1	7791.06	28780.5	22754.7	0	876.354	78968.6	19261.9	0	3107.68	0.6629	792.828	130.591			Jaipur	2019-20	200261	33877.5	429.559	80288.5	24778.5	28780.5	22785.9
	Karauli	2008-09	0	154.493	15.8004	451.189	10.8262	0	0	0	0.8778	0	18075.4	0.8778	0.5852	0	0	18123.1			Karauli	2008-09	34324	6.7298	0	3260.73	443.289	803.772	151.859	0.2926	79.002	4.389	7793.4	714.529	3245.23	0	9.6558	233.787			Karauli	2008-09	34324	161.223	15.8004	3711.92	454.115	803.772	151.859
	Karauli	2009-10	32.186	155.956	43.3048	320.104	16.093	0	0	0	1.7556	0	13620.8	0	0.2926	0	0	21169			Karauli	2009-10	39077.3	19.019	0	5858.14	366.92	680.588	16.3856	1.1704	48.5716	16.093	8409.91	306.06	8413.71	0	15.5078	229.984			Karauli	2009-10	39109.5	174.975	43.3048	6178.25	383.013	680.588	16.3856
	Karauli	2010-11	0	126.988	19.3116	203.942	15.5078	0	0	0	0.2926	0	12709.4	0	0	0	0	24964			Karauli	2010-11	39062.1	19.019	1.1704	4660.53	314.545	419.881	101.532	3.8038	22.2376	8.778	8983.99	536.043	5185.75	0	14.9226	247.247			Karauli	2010-11	39062.1	146.007	20.482	4864.48	330.053	419.881	101.532
	Karauli	2011-12	0	97.1432	17.2634	444.167	26.6266	0	0	0	0	0	15269	0	0	0	0	21901.1			Karauli	2011-12	37633	7.315	2.3408	5012.82	285.87	327.127	80.7576	0.5852	35.4046	9.0706	8291.41	434.218	7282.81	0	35.112	130.207			Karauli	2011-12	37633	104.458	19.6042	5456.99	312.497	327.127	80.7576
	Karauli	2012-13	0	77.8316	46.5234	726.818	1.463	0	0	0	0	0	17613.9	0	0	0	0	22769			Karauli	2012-13	35989.5	9.0706	4.9742	4215.2	261.292	1406.53	68.1758	0.2926	41.8418	6.1446	6587.3	523.461	7267.89	0.2926	13.4596	155.663			Karauli	2012-13	35989.5	86.9022	51.4976	4942.01	262.755	1406.53	68.1758
	Karauli	2013-14	0	96.558	0.5852	723.6	2.6334	0	0	0	0	0	18303.9	0	0	0	0	24273.5			Karauli	2013-14	35669.4	4.0964	0.2926	4211.1	238.469	3263.37	72.2722	0	26.334	2.3408	5789.68	557.11	4114.25	3.5112	14.3374	134.596			Karauli	2013-14	35669.4	100.654	0.8778	4934.7	241.102	3263.37	72.2722
	Karauli	2014-15	0	76.9538	2.6334	346.438	0.8778	0	0	0	0.5852	0	18138.9	0	0	0	0	24817.2			Karauli	2014-15	36501.8	2.3408	0	2696.6	187.557	1328.4	52.0828	0	21.945	2.0482	6489.28	521.706	3559.48	0.2926	6.4372	103.288			Karauli	2014-15	36501.8	79.2946	2.6334	3043.04	188.434	1328.4	52.0828
	Karauli	2015-16	35.9898	35.6972	0	150.104	1.463	0	0	0	0.2926	0	16842.3	5.852	0.8778	0.2926	0	23020			Karauli	2015-16	36467.3	0	0	652.498	147.47	1653.48	114.407	0	15.8004	4.9742	6543.71	521.706	6378.39	3.2186	5.852	87.78			Karauli	2015-16	36503.3	35.6972	0	802.602	148.933	1653.48	114.407
	Karauli	2016-17	0	55.8866	0	462.308	1.1704	0	0	0	0	0	19705.7	2.3408	0	0.2926	0	26012.4			Karauli	2016-17	37276.4	4.9742	0	2121.94	148.056	1082.33	129.622	0.5852	9.9484	18.1412	4019.74	543.943	4150.82	0.2926	30.723	85.4392			Karauli	2016-17	37276.4	60.8608	0	2584.24	149.226	1082.33	129.622
	Karauli	2017-18	0	57.057	1.463	459.089	3.5112	0	0	0	0	0	15832.9	0.2926	0	0	0	22019.3			Karauli	2017-18	38309.5	0	0	329.468	94.2172	741.156	142.496	0	7.315	7.6076	4903.1	435.389	4249.72	2.926	52.9606	48.8642			Karauli	2017-18	38309.5	57.057	1.463	788.557	97.7284	741.156	142.496
	Karauli	2018-19	0	33.9416	0	680.588	14.63	0	0	0	0	0	20896	1.463	0	0	0	22692			Karauli	2018-19	37950.5	3.2186	0	2021.57	61.7386	541.895	147.47	0	5.2668	7.0224	3455.31	503.272	5152.39	1.1704	200.138	85.7318			Karauli	2018-19	37950.5	37.1602	0	2702.16	76.3686	541.895	147.47
	Karauli	2019-20	0	27.5044	0	628.505	45.353	0	0	0	0	0	21050.5	0.2926	0	0	0	21626.4			Karauli	2019-20	38457.9	0	0	3632.34	39.501	404.666	134.889	0	5.852	16.093	5360.72	500.053	6335.38	0.8778	51.7902	75.1982			Karauli	2019-20	38457.9	27.5044	0	4260.84	84.854	404.666	134.889
	Pratapgarh	2008-09	0	546.638	52.8612	2655.97	2.1924	0	0	0	9.2568	0	1976.08	0	0	0.4872	0	10858.7			Pratapgarh	2008-09	7.308	0	558.575	4685.4	223.381	21.1932	103.774	776.353	13528.8	13.8852	15.5904	372.708	196.585	23927.1	1163.19	8.2824			Pratapgarh	2008-09	7.308	546.638	611.436	7341.37	225.574	21.1932	103.774
	Pratapgarh	2009-10	0	551.51	36.7836	2490.32	1.4616	0	0	0	13.398	0	1346.86	0	0	0	0	11602.4			Pratapgarh	2009-10	2.436	0	513.752	3419.41	173.2	17.5392	79.6572	775.379	13661.1	23.142	8.0388	372.708	209.252	24235.8	873.062	16.8084			Pratapgarh	2009-10	2.436	551.51	550.536	5909.74	174.661	17.5392	79.6572
	Pratapgarh	2010-11	0.2436	514.727	33.1296	2396.54	1.7052	0	0	0	8.2824	0	1348.57	0	0	0	0	12002.9			Pratapgarh	2010-11	0.7308	0.2436	493.777	3065.22	193.418	13.8852	61.3872	1147.6	13914.7	195.124	11.9364	322.526	255.78	24633.8	830.92	11.2056			Pratapgarh	2010-11	0.9744	514.97	526.907	5461.76	195.124	13.8852	61.3872
	Pratapgarh	2011-12	0	515.945	31.9116	2363.65	0.4872	0	0	0	48.72	0	1259.9	0	0	0	0	13551			Pratapgarh	2011-12	1.7052	0.7308	303.526	2357.32	196.342	12.18	33.6168	1283.77	13461.8	15.1032	23.142	284.525	205.842	25757.5	934.693	14.3724			Pratapgarh	2011-12	1.7052	516.676	335.437	4720.97	196.829	12.18	33.6168
	Pratapgarh	2012-13	0	454.314	31.4244	2778.5	1.218	0	0	0	39.7068	0	2599.7	0	0	0	0	14170.5			Pratapgarh	2012-13	1.7052	0.2436	417.043	1854.53	142.262	65.0412	16.5648	1445.04	12754.4	179.533	30.45	277.217	169.302	27056.9	909.602	16.0776			Pratapgarh	2012-13	1.7052	454.558	448.468	4633.03	143.48	65.0412	16.5648
	Pratapgarh	2013-14	0	437.018	9.0132	3358.76	0.9744	0	0	0	55.7844	0	2480.82	0	1.7052	3.1668	0	16000.1			Pratapgarh	2013-14	1.7052	0	190.252	1722.98	110.838	49.4508	14.1288	1783.4	12182.2	182.456	23.6292	274.537	111.325	29414.9	916.91	3.8976			Pratapgarh	2013-14	1.7052	437.018	199.265	5081.74	111.812	49.4508	14.1288
	Pratapgarh	2014-15	0	358.579	27.5268	3321	0	0	0	0	54.81	0	1834.55	0	1.9488	0.7308	0	15665.2			Pratapgarh	2014-15	0.7308	0	163.212	812.406	114.736	27.2832	9.2568	2129.79	11848.9	6.8208	7.5516	270.152	119.608	29499	865.511	2.436			Pratapgarh	2014-15	0.7308	358.579	190.739	4133.4	114.736	27.2832	9.2568
	Pratapgarh	2015-16	0	331.783	7.308	2898.84	0	0	0	0	515.945	0	2393.86	7.5516	5.6028	410.466	0	13853.5			Pratapgarh	2015-16	0.4872	0	153.468	530.804	89.8884	0	4.872	2521.75	10445.1	9.9876	0.7308	200.483	105.479	30874.6	970.746	0			Pratapgarh	2015-16	0.4872	331.783	160.776	3429.64	89.8884	0	4.872
	Pratapgarh	2016-17	0	319.36	8.0388	2974.6	0	0	0	0	85.5036	0	2719.06	0	3.1668	0	0	15501.2			Pratapgarh	2016-17	1.218	0	189.521	488.905	106.21	13.398	2.9232	2329.79	10612.9	2.6796	1.4616	200.483	106.21	31735.7	963.682	0			Pratapgarh	2016-17	1.218	319.36	197.56	3463.5	106.21	13.398	2.9232
	Pratapgarh	2017-18	0	336.899	17.7828	3773.61	0.4872	0	0	0	73.5672	0	2608.71	0	0.9744	0	0	15717.6			Pratapgarh	2017-18	1.7052	0	217.048	505.226	180.508	10.4748	1.4616	2102.51	10208.8	2.9232	0.4872	201.944	98.9016	31557.2	1209.96	0			Pratapgarh	2017-18	1.7052	336.899	234.83	4278.83	180.995	10.4748	1.4616
	Pratapgarh	2018-19	0	317.411	5.1156	5847.37	0.2436	0	0	0	60.4128	0	4162.15	0	4.3848	0	0	17123.6			Pratapgarh	2018-19	0.7308	0.2436	193.418	469.417	375.631	9.2568	0.2436	1438.95	10351.8	1.4616	0.2436	195.854	90.8628	31520.4	1440.65	0			Pratapgarh	2018-19	0.7308	317.654	198.534	6316.79	375.875	9.2568	0.2436
	Pratapgarh	2019-20	0	382.939	0	5780.87	8.0388	0	0	0	78.4392	0	2148.31	0	44.5788	0	0	21611			Pratapgarh	2019-20	0.2436	0	222.894	999.978	377.336	5.8464	0.4872	1033.35	9394.43	0.7308	0	188.79	84.2856	33787.3	1102.29	0			Pratapgarh	2019-20	0.2436	382.939	222.894	6780.85	385.375	5.8464	0.4872
	Rajsamand	2008-09	0	2639.57	6991.72	54.744	14.5984	0	1.8248	0	272.808	0	1939.76	0	0	0	0	11007.2			Rajsamand	2008-09	453.463	34.6712	482.66	310.216	1859.47	6271.84	4878.6	0	51244.9	563.863	226.275	95.802	2225.34	0.9124	1063.86	4.562			Rajsamand	2008-09	453.463	2674.24	7474.38	364.96	1874.07	6271.84	4880.43
	Rajsamand	2009-10	0	1281.92	3529.16	10.9488	1.8248	0	0	0	103.101	0	854.919	0	0	0	0	5889.54			Rajsamand	2009-10	417.879	20.9852	2424.25	146.896	1643.23	4157.81	5999.03	0	54266.8	604.921	30.1092	55.6564	1873.16	0.9124	1047.44	5.4744			Rajsamand	2009-10	417.879	1302.91	5953.41	157.845	1645.06	4157.81	5999.03
	Rajsamand	2010-11	0	7377.67	1896.88	219.888	47.4448	0	2.7372	0	132.298	0	2255.45	0	0	0	0	28986			Rajsamand	2010-11	413.317	352.186	722.621	1000.9	1681.55	3548.32	7579.31	0	57914.6	703.46	1370.42	78.4664	2064.76	0	1156.92	117.7			Rajsamand	2010-11	413.317	7729.85	2619.5	1220.79	1729	3548.32	7582.04
	Rajsamand	2011-12	0	6880.41	5020.94	247.26	81.2036	0	0	0	26.4596	0	2226.26	0	0	0	0	29453.2			Rajsamand	2011-12	395.982	62.0432	985.392	602.184	1631.37	2511.84	6575.67	0	56456.6	649.629	895.064	55.6564	1793.78	0	1357.65	30.1092			Rajsamand	2011-12	395.982	6942.45	6006.33	849.444	1712.57	2511.84	6575.67
	Rajsamand	2012-13	0	7715.25	5584.8	363.135	97.6268	0	0	0	1.8248	0	1831.19	0	0	0	0	30523.4			Rajsamand	2012-13	333.938	38.3208	831.196	532.842	1499.99	4571.12	6317.46	0	53823.4	663.315	512.769	37.4084	1440.68	1.8248	1320.24	23.7224			Rajsamand	2012-13	333.938	7753.58	6416	895.977	1597.61	4571.12	6317.46
	Rajsamand	2013-14	0	6686.07	5291.01	311.128	57.4812	0	1.8248	0	187.042	0	2024.62	0	0	0	0	27964.1			Rajsamand	2013-14	297.442	65.6928	687.037	843.97	1467.14	4983.53	6645.92	0	53421	625.906	731.745	27.372	1257.29	0	1195.24	23.7224			Rajsamand	2013-14	297.442	6751.76	5978.04	1155.1	1524.62	4983.53	6647.75
	Rajsamand	2014-15	0	6337.53	4888.64	187.954	59.306	0	0	0	13.686	0	1749.98	0	0	0	0	26946.8			Rajsamand	2014-15	289.231	65.6928	461.674	593.972	1238.13	4053.79	6650.48	0	53798.8	593.06	438.864	25.5472	1133.2	0.9124	1129.55	6.3868			Rajsamand	2014-15	289.231	6403.22	5350.31	781.927	1297.43	4053.79	6650.48
	Rajsamand	2015-16	0	5906.88	3562.01	217.151	20.0728	0	0	0	2112.21	0	1526.45	0	0	1.8248	0	23665.8			Rajsamand	2015-16	328.464	18.248	204.378	295.618	1202.54	4394.12	9627.64	0	54942.9	615.87	127.736	19.1604	1110.39	49.2696	1124.08	7.2992			Rajsamand	2015-16	328.464	5925.13	3766.39	512.769	1222.62	4394.12	9627.64
	Rajsamand	2016-17	0	7415.99	2892.31	226.275	75.7292	0	0	0	210.764	0	1403.27	0	0	0	0	29612.9			Rajsamand	2016-17	327.552	0.9124	286.494	658.753	1184.3	3736.28	10217.1	0	57989.4	681.563	145.984	26.4596	1035.57	57.4812	1188.86	1.8248			Rajsamand	2016-17	327.552	7416.9	3178.8	885.028	1260.02	3736.28	10217.1
	Rajsamand	2017-18	0	6858.51	3689.75	442.514	79.3788	0	0	0	139.597	0	1053.82	0	0	0	0	31317.2			Rajsamand	2017-18	287.406	8.2116	209.852	792.876	1081.19	3300.15	9168.71	0	57806.9	693.424	106.751	28.2844	948.896	177.918	1113.13	2.7372			Rajsamand	2017-18	287.406	6866.72	3899.6	1235.39	1160.57	3300.15	9168.71
	Rajsamand	2018-19	0	5145.02	3944.31	351.274	44.7076	0	0	0	103.101	0	894.152	0	0	0	0	20503.5			Rajsamand	2018-19	317.515	44.7076	189.779	954.37	1050.17	3012.74	8939.7	0	57369	645.979	50.182	22.81	862.218	376.821	1068.42	6.3868			Rajsamand	2018-19	317.515	5189.73	4134.08	1305.64	1094.88	3012.74	8939.7
	Rajsamand	2019-20	0.9124	6367.64	4066.57	718.059	15.5108	0	0	0	7.2992	0	772.803	0	0	0	0	30216.9			Rajsamand	2019-20	291.968	36.496	169.706	1242.69	1075.72	2390.49	8580.21	0	57909.1	593.06	78.4664	23.7224	770.066	431.565	1016.41	9.124			Rajsamand	2019-20	292.88	6404.14	4236.27	1960.75	1091.23	2390.49	8580.21
	Sawai Madhopur	2008-09	0	871.689	0	2522.71	113.732	0	9.1596	0	7.633	0	102920	46.5613	0.7633	377.833	0	39922.1			Sawai Madhopur	2008-09	50208.3	70.9869	0	5601.86	4998.09	2453.25	1971.6	12.9761	596.901	184.719	29829	2.2899	29863.3	670.941	2178.46	876.268			Sawai Madhopur	2008-09	50208.3	942.675	0	8124.57	5111.82	2453.25	1980.76
	Sawai Madhopur	2009-10	33.5852	963.285	0	2116.63	203.801	0	3.0532	0	20.6091	0	84572.9	73.2768	4.5798	248.836	0	45462.9			Sawai Madhopur	2009-10	64688.1	154.187	1.5266	18364.2	4571.4	896.878	2384.55	29.7687	540.416	77.8566	36359	5.3431	46828.5	316.769	1469.35	1239.6			Sawai Madhopur	2009-10	64721.7	1117.47	1.5266	20480.9	4775.2	896.878	2387.6
	Sawai Madhopur	2010-11	0.7633	1179.3	0	2191.43	87.7795	0	3.0532	0	1.5266	0	74936.2	489.275	0	227.463	0	62841			Sawai Madhopur	2010-11	68112.3	190.825	0	12487.6	4105.03	1086.18	1479.28	598.427	407.602	154.187	40841.1	3.8165	24824.8	372.49	1376.23	1422.03			Sawai Madhopur	2010-11	68113.1	1370.12	0	14679	4192.81	1086.18	1482.33
	Sawai Madhopur	2011-12	2.2899	867.872	0	2072.36	8.3963	0	0	0	0	0	99558.7	463.323	6.1064	369.437	0	52674.6			Sawai Madhopur	2011-12	55717.1	49.6145	14.5027	8923.74	6009.46	717.502	470.956	110.678	472.483	254.179	31090.7	3.8165	22546.4	1891.46	5077.47	851.843			Sawai Madhopur	2011-12	55719.4	917.487	14.5027	10996.1	6017.86	717.502	470.956
	Sawai Madhopur	2012-13	0	803.755	3.0532	4010.38	45.798	0	0	0	3.8165	0	120387	321.349	0	676.284	0	52894.4			Sawai Madhopur	2012-13	50872.4	33.5852	16.0293	8623.76	4221.05	3548.58	564.842	39.6916	430.501	105.335	18009.3	1.5266	25683.5	2288.37	3988.24	538.89			Sawai Madhopur	2012-13	50872.4	837.34	19.0825	12634.1	4266.85	3548.58	564.842
	Sawai Madhopur	2013-14	0	635.066	0	3881.38	36.6384	0	0	0	0.7633	0	127130	351.881	0	2141.06	0	58448.9			Sawai Madhopur	2013-14	47274.2	29.0054	2.2899	6433.09	4469.88	10506.8	515.227	89.3061	370.2	74.8034	13522.6	6.8697	14658.4	4720.25	3772.99	480.116			Sawai Madhopur	2013-14	47274.2	664.071	2.2899	10314.5	4506.52	10506.8	515.227
	Sawai Madhopur	2014-15	0	512.938	1.5266	2542.55	46.5613	0	1.5266	0	1.5266	0	129698	828.944	0	735.058	0	62531.1			Sawai Madhopur	2014-15	45089.7	9.1596	0	4419.51	2612.78	3160.83	361.041	153.423	298.45	183.955	11517.4	4.5798	11986.9	4366.84	2754.75	255.706			Sawai Madhopur	2014-15	45089.7	522.097	1.5266	6962.06	2659.34	3160.83	362.567
	Sawai Madhopur	2015-16	24.4256	377.07	0	5286.62	248.072	0	4.5798	0	9.1596	0	112663	1607.51	44.2714	3123.42	0	52880.7			Sawai Madhopur	2015-16	46288	0.7633	0.7633	4193.57	2182.27	4753.07	290.817	983.13	322.876	146.554	15614.8	0	30534.3	4956.87	7195.63	25.9522			Sawai Madhopur	2015-16	46312.5	377.833	0.7633	9480.19	2430.35	4753.07	295.397
	Sawai Madhopur	2016-17	0	403.786	0	8680.25	61.064	0	0	0	0	0	118436	1245.71	0	2138.77	0	65052.2			Sawai Madhopur	2016-17	51280	6.8697	0	3372.26	2409.74	3001.3	547.286	1794.52	332.035	281.658	5939.24	0	21246.5	6301.8	22969.2	85.4896			Sawai Madhopur	2016-17	51280	410.655	0	12052.5	2470.8	3001.3	547.286
	Sawai Madhopur	2017-18	0	339.668	1.5266	26220.9	215.251	0	0	0	0.7633	0	67839.1	1057.17	0	2130.37	0	49051.9			Sawai Madhopur	2017-18	48393.2	0	0.7633	2128.84	1545.68	1609.04	425.158	109.915	273.261	99.229	8107.01	0	19492.4	1714.37	55291.9	7.633			Sawai Madhopur	2017-18	48393.2	339.668	2.2899	28349.7	1760.93	1609.04	425.158
	Sawai Madhopur	2018-19	0	374.017	0	23241.7	18.3192	0	0	0	0	0	113484	1168.61	0	378.597	0	53483.7			Sawai Madhopur	2018-19	49700	0	0	3334.09	1821.23	1225.1	419.815	41.9815	236.623	263.339	7816.19	0	21868.5	906.037	53853.9	85.4896			Sawai Madhopur	2018-19	49700	374.017	0	26575.8	1839.55	1225.1	419.815
	Sawai Madhopur	2019-20	0	385.466	0	28528.3	20.6091	0	0	0	0	0	105304	1654.83	0	438.134	0	56433.8			Sawai Madhopur	2019-20	53668.4	0	0	4489.73	1792.99	611.403	380.887	125.181	198.458	148.08	9167.23	0	25771.3	715.212	47027.7	0			Sawai Madhopur	2019-20	53668.4	385.466	0	33018.1	1813.6	611.403	380.887
	Tonk	2008-09	12.2226	4581.59	78.9768	1886.98	85.5582	0	0.9402	0	254.794	0	125803	0	1.8804	19.7442	0	35184.2			Tonk	2008-09	50271.6	489.844	0.9402	20015.9	14751.7	4999.04	58759.7	76.1562	12302.5	40077	100240	0	44659.5	124.106	8200.42	3028.38			Tonk	2008-09	50283.8	5071.44	79.917	21902.9	14837.3	4999.04	58760.6
	Tonk	2009-10	285.821	4272.27	408.047	754.04	183.339	0	12.2226	0	629.934	0	70580.8	6.5814	16.9236	1.8804	0	36526.8			Tonk	2009-10	63426.8	176.758	6.5814	9645.51	13788	3647.98	75401.2	664.721	12486.8	32040.1	92727.2	0	68449.4	78.9768	4898.44	1011.66			Tonk	2009-10	63712.7	4449.03	414.628	10399.6	13971.4	3647.98	75413.4
	Tonk	2010-11	0	10966.5	125.047	2914.62	34.7874	0	0	0	161.714	0	81813.4	1.8804	0	1.8804	0	74431.9			Tonk	2010-11	66817.2	4965.2	5.6412	63211.5	12418.2	2598.71	76531.3	3906.53	12104.1	40124.9	88648.6	0	39352.1	61.113	5631.8	8899.93			Tonk	2010-11	66817.2	15931.7	130.688	66126.1	12452.9	2598.71	76531.3
	Tonk	2011-12	0	7515.96	777.545	4653.05	38.5482	0	0.9402	0	91.1994	0	171334	0	0	0	0	58772.8			Tonk	2011-12	45088.2	1025.76	43.2492	51620.7	16706.4	2534.78	46806	738.057	11704.5	73345.9	53646.9	0	35783.1	118.465	28334.8	4625.78			Tonk	2011-12	45088.2	8541.72	820.795	56273.8	16745	2534.78	46806.9
	Tonk	2012-13	1.8804	6362.33	1503.38	6641.57	43.2492	0	0.9402	0	51.711	0	209400	0	0	2.8206	0	54288.1			Tonk	2012-13	39397.2	924.217	86.4984	48434.4	12606.2	6619.01	46829.5	218.126	10000.9	40121.2	41146	0	27255.5	112.824	18767.3	3787.13			Tonk	2012-13	39399.1	7286.55	1589.88	55076	12649.5	6619.01	46830.4
	Tonk	2013-14	1.8804	5245.38	920.456	5426.83	74.2758	0	0	0	53.5914	0	228272	0	4.701	0	0	52825.1			Tonk	2013-14	38319.7	519.931	15.0432	49982.9	16247.6	14257.2	53380.8	188.98	10030.1	47619.2	36336.8	0	14140.6	788.828	22961.6	2097.59			Tonk	2013-14	38321.6	5765.31	935.499	55409.7	16321.9	14257.2	53380.8
	Tonk	2014-15	0	4409.54	1371.75	5374.18	50.7708	0	0	0	125.987	0	241764	5.6412	0	0.9402	0	60474.6			Tonk	2014-15	39401	494.545	32.907	41469.4	8290.68	3927.22	48617.7	423.09	8367.78	35942	39412.2	0	8546.42	385.482	15943.9	1932.11			Tonk	2014-15	39401	4904.08	1404.66	46843.6	8341.45	3927.22	48617.7
	Tonk	2015-16	369.499	3459	1078.41	7170.91	155.133	0	188.98	0	219.067	0	221445	4.701	9.402	231.289	0	48148.6			Tonk	2015-16	41925.4	42.309	19.7442	7711.52	14401	7130.48	57052.3	3339.59	8171.28	47498.9	14462.2	0	9950.14	357.276	25451.2	241.631			Tonk	2015-16	42294.9	3501.3	1098.15	14882.4	14556.2	7130.48	57241.3
	Tonk	2016-17	1.8804	4746.13	726.775	19050.3	44.1894	0	2.8206	0	31.0266	0	211676	0.9402	0	2.8206	0	64325.7			Tonk	2016-17	41971.5	166.415	5.6412	26914.2	9930.39	5005.62	58120.3	7085.35	8156.23	62763.1	17937.1	0	10560.3	537.794	62759.3	721.133			Tonk	2016-17	41973.3	4912.54	732.416	45964.5	9974.58	5005.62	58123.2
	Tonk	2017-18	0.9402	3799.35	900.712	65706.8	27.2658	0	0	0	61.113	0	163101	1.8804	0	2.8206	0	43045.2			Tonk	2017-18	39306	10.3422	7.5216	29603.1	10966.5	4211.16	49295.6	1231.66	6821.15	69150.8	12378.7	0	6917.99	106.243	108015	55.4718			Tonk	2017-18	39306.9	3809.69	908.233	95310	10993.8	4211.16	49295.6
	Tonk	2018-19	0	2625.98	727.715	34242.1	29.1462	0	0	0	30.0864	0	217324	1.8804	0	1.8804	0	37679.5			Tonk	2018-19	40869.6	7.5216	7.5216	38454.2	14437.7	3432.67	52451.9	407.107	5664.7	80453.9	36649.9	0	9598.5	41.3688	105753	59.2326			Tonk	2018-19	40869.6	2633.5	735.236	72696.3	14466.9	3432.67	52451.9
	Tonk	2019-20	0	4567.49	466.339	44786.4	1.8804	0	0	0	5.6412	0	245686	0	0	0	0	56336.8			Tonk	2019-20	48389.3	47.01	3.7608	39524.1	17020.4	1908.61	66499.4	315.907	6504.3	67332.4	19869.2	0	24118	84.618	80076.8	68.6346			Tonk	2019-20	48389.3	4614.5	470.1	84310.6	17022.3	1908.61	66499.4
	Udaipur	2008-09	0	1953.52	129.118	399.202	0.4086	0	0	0	64.9674	0	4553.44	0.4086	0	0	0	16581.8			Udaipur	2008-09	4.4946	254.149	108.279	3431.01	1638.08	5521.41	2877.77	0	70873.7	85.806	1796.61	1506.92	1140.81	639.05	2910.87	217.784			Udaipur	2008-09	4.4946	2207.67	237.397	3830.22	1638.49	5521.41	2877.77
	Udaipur	2009-10	0	1607.43	184.279	328.923	0	0	0	0	8.5806	0	2807.9	1.6344	0	0	0	13055.2			Udaipur	2009-10	31.8708	177.741	124.623	1544.51	1390.47	5275.43	3200.16	0	73237.9	93.978	712.19	1736.14	1075.03	715.459	2532.5	102.15			Udaipur	2009-10	31.8708	1785.17	308.902	1873.43	1390.47	5275.43	3200.16
	Udaipur	2010-11	0	2677.56	368.966	369.783	3.6774	0	0	0	12.258	0	3817.14	2.043	0	1.6344	0	22148.2			Udaipur	2010-11	8.9892	398.794	28.602	4188.97	1297.71	4857.44	3055.1	0	73282.4	76.8168	3350.11	1992.33	1067.26	734.663	2957.04	373.052			Udaipur	2010-11	8.9892	3076.35	397.568	4558.75	1301.39	4857.44	3055.1
	Udaipur	2011-12	0	3678.63	1102.81	600.233	33.0966	0	0	0	1.2258	0	3446.13	0	0	0	0	29019.2			Udaipur	2011-12	6.129	319.117	80.4942	3307.21	1116.7	4314.41	2847.12	0	73042.6	108.688	2243.62	2221.15	1065.63	787.372	3006.48	378.772			Udaipur	2011-12	6.129	3997.74	1183.31	3907.44	1149.8	4314.41	2847.12
	Udaipur	2012-13	0	3749.31	1116.3	688.491	27.7848	0	0	0	39.6342	0	3704.37	1.2258	0	0	0	29391.4			Udaipur	2012-13	3.2688	247.203	172.838	2751.92	1143.67	4685.42	2936.2	0	71716.7	96.021	1651.15	1923.28	999.844	1220.49	2842.63	304.816			Udaipur	2012-13	3.2688	3996.52	1289.13	3440.41	1171.46	4685.42	2936.2
	Udaipur	2013-14	0	3556.05	920.167	477.653	5.3118	0	0	0	16.344	0	3908.67	0	0	0	0	28597.9			Udaipur	2013-14	66.1932	214.924	156.902	4439.44	1086.47	5675.86	2921.49	0	70675.1	75.591	2199.09	1994.38	865.415	1294.04	2806.26	297.052			Udaipur	2013-14	66.1932	3770.97	1077.07	4917.09	1091.78	5675.86	2921.49
	Udaipur	2014-15	0	3747.68	890.748	581.846	4.4946	0	0	0	90.3006	0	3001.58	0	0	0	0	31131.2			Udaipur	2014-15	3.2688	203.074	146.687	3390.56	955.715	5058.06	2915.36	0	68946.3	84.5802	1672.81	1983.75	772.663	2826.29	3136.82	269.267			Udaipur	2014-15	3.2688	3950.75	1037.44	3972.41	960.21	5058.06	2915.36
	Udaipur	2015-16	0	3881.7	536.083	851.522	3.6774	0	0	0	171.612	0	3072.67	0	0.4086	0	0	30396.2			Udaipur	2015-16	10.215	168.343	67.0104	2713.92	829.049	6013.77	3227.12	0	70725	79.677	1426.42	1989.06	798.813	5203.52	3448.18	176.107			Udaipur	2015-16	10.215	4050.04	603.094	3565.44	832.727	6013.77	3227.12
	Udaipur	2016-17	0	3834.3	409.417	735.889	6.5376	0	0	0	14.301	0	2580.72	0	0	0	0	32714.6			Udaipur	2016-17	8.5806	149.139	74.3652	2968.07	628.835	5426.62	2943.55	0	70361.7	63.333	1488.53	1987.43	677.459	5934.91	3410.58	140.967			Udaipur	2016-17	8.5806	3983.44	483.782	3703.96	635.373	5426.62	2943.55
	Udaipur	2017-18	0	3713.77	404.514	847.845	9.8064	0	0	0	11.0322	0	1747.58	0	0	0	0	32951.1			Udaipur	2017-18	15.5268	133.612	97.6554	2972.16	575.717	4941.2	2326.98	0	66621.4	59.247	1378.21	2125.54	624.341	7903.55	3328.86	119.72			Udaipur	2017-18	15.5268	3847.38	502.169	3820	585.524	4941.2	2326.98
	Udaipur	2018-19	0	3327.64	491.546	1150.21	0	0	0	0	0	0	1372.08	0	0	0	0	30456.2			Udaipur	2018-19	14.7096	134.021	93.1608	2601.15	550.793	4226.56	1744.31	0	64905.7	72.7308	1160.42	1896.31	554.879	9886.08	3080.44	104.193			Udaipur	2018-19	14.7096	3461.66	584.707	3751.36	550.793	4226.56	1744.31
	Udaipur	2019-20	0	3485.36	515.653	1286.68	0	0	0	0	62.1072	0	1171.46	0	0	0	0	33935			Udaipur	2019-20	20.43	221.87	149.139	3172.78	563.051	3671.68	2061.8	0	65445.1	42.903	1150.62	1917.15	536.9	13300.7	3133.14	59.6556			Udaipur	2019-20	20.43	3707.23	664.792	4459.46	563.051	3671.68	2061.8
	Yield		Bajra	Barley	Cotton	Gram	Groundnut	Guar	Jowar/Sorghum	Lentil/Masoor	Maize	Moong/Mungbean	Rape & M	Rice/Paddy	Sesame	Soyabean	Urad/Black Gram	Wheat			Production		Bajra	Barley	Cotton	Gram	Groundnut	Guar	Jowar/Sorghum	Lentil/Masoor	Maize	Moong/Mungbean	Rape & M	Rice/Paddy	Sesame	Soyabean	Urad/Black Gram	Wheat
	District	Year	Yield	Yield	Yield	Yield	Yield	Yield	Yield	Yield	Yield	Yield	Yield	Yield	Yield	Yield	Yield	Yield			District	Year	Production	Production	Production	Production	Production	Production	Production	Production	Production	Production	Production	Production	Production	Production	Production	Production
			(Ton/ha)	(Ton/ha)	bales	(Ton/ha)	(Ton/ha)	(Ton/ha)	(Ton/ha)	(Ton/ha)	(Ton/ha)	(Ton/ha)	(Ton/ha)	(Ton/ha)	(Ton/ha)	(Ton/ha)	(Ton/ha)	(Ton/ha)					(T)	(T)	(T)	(T)	(T)	(T)	(T)	(T)	(T)	(T)	(T)	(T)	(T)	(T)	(T)	(T)
	Ajmer	2008-09	0.979497	2.33689	1.72925	0.454987	0.667554	0.451883	0.535527	0.857143	0.719194	0.282326	0.641446	1.75	0.240167	0.965517	0.227115	2.2583			Ajmer	2008-09	53412.7	12051.2	1217.72	6189.9	1148.82	2969.27	50234	3.9276	16825.8	13675.2	9095.67	4.5822	4040.85	18.3288	1370.73	24546.8
	Ajmer	2009-10	0.0757459	2.2001	0.696484	0.411392	0.116318	0.00486449	0.016147	1	0.0604128	0.0196769	0.559678	1.57143	0.0210224	1.19048	0.0236178	2.47152			Ajmer	2009-10	4231.33	5664.25	499.914	42.549	181.979	27.4932	1554.67	1.3092	1394.95	1017.25	1046.71	7.2006	350.211	16.365	142.048	14174.1
	Ajmer	2010-11	1.36128	2.25923	1.733	0.831499	1.41133	0.858196	0.758067	0.88	1.50631	0.752434	1.55963	2	0.381314	1.4	0.72246	3.23225			Ajmer	2010-11	84050	62595.5	632.745	60489.6	1875.43	3581.32	79585	14.4012	34924.2	41082	25279.3	11.7828	5321.9	9.1644	4190.09	136095
	Ajmer	2011-12	1.27867	2.72352	1.89329	0.75999	1.35947	0.668599	0.768456	1.14286	1.18545	0.327922	1.09238	1.88889	0.161049	1.5	0.12452	3.15199			Ajmer	2011-12	62403	31054.9	2457.69	43625.8	2371.62	2340.19	58497	20.9472	25160.9	28312.1	19266.2	11.1282	2270.81	1.9638	1929.76	96046.2
	Ajmer	2012-13	1.07845	3.2413	1.12074	1.18527	0.830741	0.571278	0.776442	1	0.839038	0.292478	1.46897	1.8	0.157135	2	0.230758	3.31704			Ajmer	2012-13	49761.4	54947.1	3890.69	69879.2	1503.62	7447.38	68664.3	3.273	16190.9	17901.3	39397.1	5.8914	1696.07	1.3092	3036.03	143367
	Ajmer	2013-14	1.23066	2.70342	3.08971	1.06592	1.33977	0.674113	0.599202	0.888889	1.10427	0.504889	1.37285	2.2	0.242811	0.846154	0.233905	3.44773			Ajmer	2013-14	54704.3	43402.6	5253.03	116537	2271.46	19654.4	54372.4	5.2368	21283	26196.4	47265.4	7.2006	1718.98	7.2006	3358.1	126386
	Ajmer	2014-15	1.34104	1.96869	3.57134	0.464861	1.35461	0.593885	0.562211	0.816667	0.959647	0.40273	0.713709	2.22222	0.221214	1.04348	0.393932	2.11347			Ajmer	2014-15	60960.3	31611.9	6869.9	25178.5	1847.94	11378.9	50550.2	32.0754	17170.8	22810.8	21425.1	13.092	1324.26	15.7104	5031.26	86386.9
	Ajmer	2015-16	0.770817	2.4744	2.62626	0.834078	1.45393	0.31825	0.30682	0.863636	0.667424	0.516684	1.20667	2	0.255233	0.684211	0.555839	2.76131			Ajmer	2015-16	30904.3	28502.6	4209.36	10750.5	2251.82	6850.39	29589.2	37.3122	11536.7	30103.7	31049.6	2.6184	1444.7	8.5098	9282.23	76448.8
	Ajmer	2016-17	0.980782	3.2078	3.10983	0.839262	1.32821	0.775715	0.566617	1	1.10013	0.701152	1.35118	2.28571	0.504748	1	0.704682	3.33563			Ajmer	2016-17	39621.6	46553.2	3409.46	82056.1	1584.13	10090.7	53395.1	46.4766	18591.3	48281.3	43632.4	10.4736	2331.03	0.6546	14739	121110
	Ajmer	2017-18	1.19037	2.62765	4.54549	0.927908	1.40863	0.801845	0.587757	1.09091	1.25464	0.658409	1.70563	2.33333	0.368573	1	0.79239	3.17425			Ajmer	2017-18	45581.8	26875.9	6098.81	40206.2	1367.46	8648.58	48803	7.8552	19190.3	46662.5	26610.8	13.7466	1590.68	0.6546	28886.8	83796
	Ajmer	2018-19	1.66615	3.07414	4.38539	0.943032	1.06356	0.824641	0.751424	1.125	1.71407	0.69418	1.81505	2.33333	0.382217	1	0.717	3.47204			Ajmer	2018-19	67055.9	27903	5256.41	56380	865.381	7286.35	66214.8	5.8914	25455.4	55026.3	33243.9	9.1644	1573	0.6546	20110.6	79063.9
	Ajmer	2019-20	1.52312	3.23142	3.91941	1.40798	1.38545	1.03434	0.595732	1.41667	1.33887	0.615929	1.77403	2.33333	0.406166	0.333333	0.342797	3.58095			Ajmer	2019-20	61612.9	61123.3	4389.07	160046	1084.67	8378.88	59475.6	11.1282	19697.6	46603.6	44478.1	4.5822	2681.9	0.6546	6813.08	179843
	Bhilwara	2008-09	1.08235	2.13889	1.28483	0.674831	1.1246	0.241746	0.421323	0.797081	1.56306	0.135583	0.903678	1.80576	0.223114	1.13275	0.239563	2.63283			Bhilwara	2008-09	2648.13	18146.5	3133.5	11499.2	10367.6	5315.15	10696	3095.18	252672	1911.44	35781.2	451.549	6947.74	3714.93	8960.82	128772
	Bhilwara	2009-10	0.189138	2.19187	0.671669	0.502522	0.370068	0.0135774	0.121507	0.610982	0.69021	0.0882316	0.781361	1.51395	0.102359	0.683621	0.116274	2.69294			Bhilwara	2009-10	538.801	13142.6	2397.11	1164.85	2851.41	162.81	4380.56	2362.09	116259	1266.5	6757.04	585.575	2666.12	2139.91	4278.92	92977.7
	Bhilwara	2010-11	1.10833	2.45372	2.4697	0.868392	1.42498	0.646686	0.641511	0.92525	1.83636	0.644226	1.27918	2.02551	0.466982	1.46048	0.847883	2.59289			Bhilwara	2010-11	5089.37	65957.6	4875.14	39124.7	8867.27	4405.75	31296.3	5155.03	334207	11973.2	37084.6	714.203	11615.2	3440.59	27991.5	277031
	Bhilwara	2011-12	0.825815	2.66128	2.80697	0.792594	1.1473	0.554665	0.758205	0.89156	1.68798	0.27715	1.14741	1.88525	0.140922	1.1854	0.500941	2.90435			Bhilwara	2011-12	2140.81	54820.9	16724	20889.1	7426.27	3112.27	25061	4903.17	258898	5006.62	29651.1	620.655	4305.01	6015.86	28742.6	286277
	Bhilwara	2012-13	1.86476	2.90366	2.92141	1.21977	1.07781	0.546771	1.51844	1.03622	1.8174	0.4083	1.25458	1.77255	0.157602	1.08005	0.55016	3.39805			Bhilwara	2012-13	3522.44	65037.4	22681.7	32086.1	6591.54	14364.1	48224.9	5379.01	255233	5274.67	47559.3	406.574	3333.55	6699.48	27565.2	372245
	Bhilwara	2013-14	1.23062	2.8481	3.09989	1.24585	0.849131	0.620618	0.883452	0.891365	1.7207	0.261254	1.31929	2.14726	0.114158	1.37585	0.341612	3.60252			Bhilwara	2013-14	2241.55	65555.6	18713.8	51257.1	5406.89	32594.3	26243.8	5144.24	237750	2416.96	73200.4	563.986	1763.92	11274.3	15391.3	403328
	Bhilwara	2014-15	1.25167	1.77233	3.1161	0.72642	1.3204	0.662638	0.936369	0.566684	2.01253	0.342294	0.882952	2.18555	0.174904	1.03432	0.467094	2.05409			Bhilwara	2014-15	2366.58	40822.9	21614.4	17416.1	7439.76	18639.4	27227.9	5003.02	277086	4077.43	32535.8	1006.54	2008.58	11060.3	22465.9	253542
	Bhilwara	2015-16	0.790323	2.27564	2.62941	0.85867	0.762304	0.293794	0.280647	0.752808	1.21461	0.123175	1.02761	2.0212	0.123953	0.676873	0.187204	3.05981			Bhilwara	2015-16	1542.64	34063.2	17846.1	9465.44	5322.34	7396.59	10866.9	11031.5	177864	2117.42	29967.7	1029.03	1503.96	7039.49	11951.7	246716
	Bhilwara	2016-17	1.39324	3.01862	3.20803	1.12116	0.950128	0.697697	0.786145	1.00539	1.53231	0.535244	1.24361	2.28932	0.276005	0.812208	0.494795	3.59858			Bhilwara	2016-17	2782.15	71441	15414.7	33693.5	8019.94	11224.9	31928.7	10743.6	238555	10197.6	44288.7	1060.51	2761.47	3602.5	33945.3	452505
	Bhilwara	2017-18	1.07983	2.9514	3.84146	1.13201	1.21378	0.679973	1.00052	0.903572	2.27623	0.355719	1.25303	2.36632	0.239253	1.08197	0.217018	3.31835			Bhilwara	2017-18	2238.86	56706.3	24358.4	34641.5	9933.18	7293.15	36315.5	5529.23	325425	4493	24401.6	1226.02	2167.8	5176.62	19559.6	306849
	Bhilwara	2018-19	1.57607	3.13836	3.45307	1.18062	1.51259	0.822507	1.34386	1.1156	2.46127	0.516091	1.23143	2.29008	0.308467	1.51473	0.49292	3.73238			Bhilwara	2018-19	3186.93	53986.2	22358.8	56132.4	14861.5	6765.14	66967.8	3975.79	343922	6635.61	36269.6	1079.4	2506.91	6659.9	34475.1	306308
	Bhilwara	2019-20	0.403182	3.36461	2.75178	1.64059	0.786942	0.719522	0.939313	1.37726	1.44786	0.271833	1.7005	2.18896	0.118695	0.480143	0.20161	4.08919			Bhilwara	2019-20	1071.3	78921.2	18703.2	117649	8445.41	3955.1	57959.3	4117.91	223313	2981.84	52705.3	927.385	1145.06	2174.99	11016.2	537212
	Bundi	2008-09	1.22674	3.06085	2.352	1.14476	1.66733	1.00182	0.84083	0.767395	2.25027	0.418919	1.01297	1.84996	0.335128	0.974414	0.647653	3.6484			Bundi	2008-09	436.81	322.109	0.556577	800.261	117.206	76.4208	135.302	640.181	10241.9	4.3152	11884.6	6310.63	866.52	10374.7	1025.76	59830.1
	Bundi	2009-10	0.819296	2.7741	1.96	0.739112	1.08796	0	0.121251	0.96855	1.30488	0.0434783	1.10889	0.867534	0.232479	0.681794	0.321346	3.39404			Bundi	2009-10	362.894	256.406	0.278289	711.034	65.424	0	26.448	1684.74	6900.28	0.4176	9835.32	4364.89	516.71	5263.57	386.837	50959.4
	Bundi	2010-11	1.10838	2.84995	1.96	1.17816	1.96701	0.516686	0.699552	0.874775	2.51763	0.622881	1.16757	1.87663	0.423146	1.44607	1.0136	3.80028			Bundi	2010-11	753.072	425.674	0.139144	1486.66	107.88	62.5008	65.1456	2372.66	17036.3	20.4624	6775.56	5981.56	2144.79	11105.1	1919.57	79479
	Bundi	2011-12	1.31162	2.83892	3.045	1.2476	1.9257	0.597101	0.739437	1.35946	2.6796	0.508982	1.64817	1.6314	0.338805	1.26709	0.722424	4.53697			Bundi	2011-12	442.934	554.434	4.03519	1011.43	133.493	28.6752	14.616	2177.37	15309.1	11.832	12224.7	4763.01	942.384	13427.9	4376.03	98415.7
	Bundi	2012-13	1.51578	3.11103	2.90905	1.24894	1.55144	0.446617	1.05051	1.12532	3.04623	0.294737	1.21346	1.97722	0.302907	1.47693	0.739012	4.39987			Bundi	2012-13	407.856	585.058	6.53978	902.294	104.957	41.3424	14.4768	1159.95	18069	3.8976	11311.7	5315.21	519.216	18230.3	4191.87	94386
	Bundi	2013-14	0.90292	3.0454	3.24414	1.25584	1.94915	0.56452	0.617647	1.01356	1.99896	0.378378	1.23996	2.44174	0.122595	0.947443	0.456835	3.79271			Bundi	2013-14	172.19	364.147	4.45262	351.898	112.056	303.874	5.8464	1217.58	8274.47	3.8976	12154.1	10014.9	86.0256	11736.2	2280.51	84621.8
	Bundi	2014-15	0.920823	2.80387	3.14512	0.344212	2.01709	0.593366	0.764706	0.669439	2.67402	0.512821	0.726067	2.22091	0.279022	1.07197	0.789751	2.13169			Bundi	2014-15	205.598	282.576	6.40064	77.8128	131.405	67.2336	7.2384	1669.7	12718.1	5.568	5401.1	10680.5	187.363	12611.7	4417.23	51331.8
	Bundi	2015-16	1.09285	2.99308	2.744	1.13025	2.02524	0.464576	0.546392	1.01777	2.90745	0.437811	1.40044	2.22842	0.186913	0.930525	0.443136	4.17135			Bundi	2015-16	206.434	301.229	4.87005	370.829	145.186	55.68	7.3776	3620.17	12026.2	12.2496	9911.18	12363.2	83.1024	11249.7	3880.2	89951
	Bundi	2016-17	1.19523	3.29712	3.30899	1.509	2.04505	1.2012	0.60479	0.906074	2.88055	0.495327	1.40806	2.67273	0.333541	1.01553	0.626421	4.35123			Bundi	2016-17	188.338	477.317	13.9381	1505.87	126.394	111.36	14.0592	3982.79	12165.5	14.7552	7616.05	16498.3	74.6112	9065.12	7930.64	98272.1
	Bundi	2017-18	1.70607	3.32381	3.2342	1.281	1.95349	0.371212	0.585859	0.890503	3.45463	0.428571	1.37711	2.83155	0.289812	1.42056	0.623394	4.12567			Bundi	2017-18	218.962	874.454	20.5877	9022.25	105.235	6.8208	8.0736	571.694	11033.4	4.5936	3954.25	18527.5	40.7856	4734.75	12504.1	84275.7
	Bundi	2018-19	0.891577	3.59725	3.24746	1.43908	2.05455	0.329897	0.833333	1.04973	4.70356	0.495726	1.63516	2.48941	0.212614	1.14715	0.229064	4.46295			Bundi	2018-19	138.504	800.678	22.6701	4922.25	94.3776	4.4544	13.92	355.517	15555.9	8.0736	13445.9	17401.8	29.0928	4350.56	4448.41	91668.8
	Bundi	2019-20	1.18649	3.52734	3.67797	1.85898	2.19783	0.452261	0.709742	1.13546	0.707143	0.552632	1.61778	2.68956	0.0407143	0.489872	0.18594	4.72045			Bundi	2019-20	266.568	1382.67	5.13509	6530.57	112.891	12.528	99.3888	213.533	3963.16	2.9232	9359.53	21648.9	7.9344	3140.91	2508.11	114691
	Chittaurgarh	2008-09	0.818182	2.99112	2.39792	0.881899	1.1131	1.00019	0.803314	1.09861	2.80211	0.421622	1.1422	1.80759	0.20834	1.23684	0.100184	3.60908			Chittaurgarh	2008-09	23.5332	14388.4	982.772	5974.82	24267.1	4534.93	5240.06	621.451	406307	203.954	80664.8	581.357	1219.37	49268.1	379.146	264378
	Chittaurgarh	2009-10	0.416667	2.8857	2.03096	0.946227	1.09625	0.318133	0.624379	0.690141	1.74664	0.033195	1.22327	1.51471	0.272244	0.987006	0.45465	3.2948			Chittaurgarh	2009-10	4.358	11134.7	2585	3726.96	18008.1	1033.72	4161.02	256.25	267068	13.9456	42024.2	987.523	1472.13	31977.3	1376.26	186879
	Chittaurgarh	2010-11	1.13333	2.53797	3.69922	0.990246	1.59913	0.438232	0.648867	0.849338	2.20866	0.622047	1.34684	2.02512	0.405566	1.27859	0.498423	4.04058			Chittaurgarh	2010-11	14.8172	15349.7	3260.22	7609.94	27030.1	1434.65	5115.42	447.131	347005	413.138	62356.9	1475.62	2324.56	40470.1	1790.27	366888
	Chittaurgarh	2011-12	1.25926	3.07858	3.60744	0.958888	1.38129	0.782887	1.02452	1.17024	2.45292	0.509761	1.3968	1.88654	0.192323	1.51119	0.341704	3.72641			Chittaurgarh	2011-12	29.6344	20693.5	11252.2	4960.28	23331	2344.6	7502.73	712.969	328363	204.826	49480.7	855.04	1231.57	64127.1	1933.21	357517
	Chittaurgarh	2012-13	0.952381	3.33137	3.49902	1.14385	1.37592	0.646004	1.06125	1.34988	2.60348	0.297424	1.46123	1.76972	0.300909	1.48298	0.616345	4.19263			Chittaurgarh	2012-13	17.432	20705.7	9257.05	5994.86	20949.8	5213.91	9544.02	474.15	318053	110.693	68906.1	488.968	1615.07	86276.2	3398.37	408770
	Chittaurgarh	2013-14	0.9	3.38385	4.06959	1.36668	0.919181	0.887184	0.961266	0.652651	2.25335	0.382812	1.41538	2.14603	0.157434	0.858232	0.244967	4.02803			Chittaurgarh	2013-14	7.8444	23704	7884.82	8001.29	13808.8	8615.77	8760.45	311.161	243425	128.125	73142.9	589.202	611.863	69691.4	1007.57	435153
	Chittaurgarh	2014-15	1.07692	2.21007	4.34881	1.02417	1.16608	0.766703	1.3148	1.02256	2.74119	0.515086	0.947473	2.18504	0.495369	1.24729	0.688854	2.84888			Chittaurgarh	2014-15	24.4048	19174.3	8405.83	4765.04	12943.3	5450.99	11871.2	987.523	251891	208.312	28220.7	967.476	1445.11	127068	2688.01	359423
	Chittaurgarh	2015-16	0.793103	2.71887	3.23241	1.11415	0.967939	0.528777	1.14204	1.18826	2.17231	0.436831	1.25908	2.02256	0.160806	0.553189	0.229474	3.48139			Chittaurgarh	2015-16	40.0936	21730.7	5407.86	4687.46	9815.09	3931.79	12242.5	1958.49	170848	177.806	51240.5	1718.8	382.632	69447.3	1152.26	388753
	Chittaurgarh	2016-17	0.995575	3.60194	4.04577	1.51422	0.843914	0.483721	0.90937	0.892102	1.45463	0.494297	1.56774	1.36873	0.10199	0.812669	0.318327	4.03487			Chittaurgarh	2016-17	196.11	30072.8	6168.55	9278.18	12351.4	3638.93	10853.2	699.023	141254	226.616	56559.9	1022.39	214.414	83808.7	2261.8	555235
	Chittaurgarh	2017-18	0.870968	3.27996	3.85626	1.46851	1.68941	0.664047	1.08285	0.970509	3.05002	0.432071	1.51479	2.30112	0.385335	0.829006	0.502344	4.07573			Chittaurgarh	2017-18	23.5332	27673.3	6853.25	21825.7	27369.1	3681.64	12577.2	631.038	283988	169.09	46298.5	2158.08	682.463	84263.7	5043.08	545603
	Chittaurgarh	2018-19	0.893939	3.43359	3.3559	1.72431	1.98061	0.333956	1.45175	1.16384	3.05887	0.495652	1.60307	1.63457	0.347797	1.31404	0.530528	4.37499			Chittaurgarh	2018-19	51.4244	24875.5	7534.84	57414	44510.9	1557.55	19407.9	359.099	284274	248.406	56107.5	1731	454.104	121487	5801.37	520061
	Chittaurgarh	2019-20	1.18627	3.37696	2.12	2.13384	0.784227	0.452102	0.927145	1.37557	1.69314	0.558923	1.8464	0.742566	0.32784	0.417309	0.125745	4.67618			Chittaurgarh	2019-20	105.464	28203.2	3806.24	87379.6	17404.1	1846.92	13997.9	264.966	180504	289.371	23018.1	761.778	329.465	37346.3	1065.97	744499
	Dausa	2008-09	1.76531	2.81918	2.26154	1.14353	1.62973	0.615509	0.899655		1.24873	0.420814	1.37583		0.508772		0.333333	3.17701			Dausa	2008-09	140436	15880.7	6.65034	5146.76	15918	4562.63	3644.51	0	1145.65	61.8729	78665.1	0	2932.64	0	1.3306	163523
	Dausa	2009-10	1.33297	2.51996	2.03762	0.79954	1.30569	0.423913	0.539386		1.11146	0.0422535	1.31592		0.352189		0.333333	3.47549			Dausa	2009-10	122839	12807	23.2762	3240.01	13333.3	2335.2	3375.73	0	709.875	1.9959	68942.4	0	3699.07	0	1.3306	194127
	Dausa	2010-11	1.4287	2.81417	2.61333	1.1774	1.45153	0.890251	0.420778		1.79708	0.625	1.65193		0.290377		0.8	3.54849			Dausa	2010-11	133628	14457.6	5.32027	8040.82	15858.8	4155.46	2093.7	0	818.984	36.5915	78235.3	0	2385.1	0	2.6612	222991
	Dausa	2011-12	1.64394	2.83399	2.94	1.0898	1.37313	0.847889	0.769603		1.57995	0.504348	1.19909		0.256159	1.5	0.5	3.77027			Dausa	2011-12	151705	12868.2	6.65034	8534.47	17498.1	2925.99	3173.48	0	880.857	38.5874	61458.4	0	1950.66	1.9959	11.9754	220442
	Dausa	2012-13	1.86134	3.23819	2.94	1.35732	1.49455	1.05018	0.925279		1.88361	0.3	1.48852		0.366561	1	0.588235	3.71098			Dausa	2012-13	166547	15692.4	9.97551	11395.3	16416.3	6557.86	3138.89	0	764.43	9.9795	77194.1	0	2546.77	0.6653	6.653	225442
	Dausa	2013-14	1.73495	2.87782	5.88	1.57038	1.30992	1.05835	0.777542		1.59774	0.382353	1.48167		0.346949		0.333333	3.71371			Dausa	2013-14	151853	13649.3	0.665034	19216.5	12310.7	12416.5	2925.32	0	565.505	17.2978	73261.5	0	1864.84	0	0.6653	236488
	Dausa	2014-15	1.81805	2.95534	3.528	1.28389	1.09569	0.971321	1.16632		1.74066	0.515385	1.46242		0.336452		0.333333	3.59961			Dausa	2014-15	164821	13340.6	1.9951	16160.1	9217.73	8044.14	4497.43	0	558.187	44.5751	62970	0	1866.17	0	0.6653	248209
	Dausa	2015-16	1.14844	3.11747	2.94	1.14695	1.14391	0.772013	0.71608		1.31364	0.435897	1.37605		0.289662		0.363636	3.81362			Dausa	2015-16	112011	11670.7	2.66014	8531.81	9318.19	7227.15	2921.33	0	384.543	11.3101	54491.4	0	2259.36	0	2.6612	252738
	Dausa	2016-17	1.62378	3.32847	3.28571	1.48932	1.29914	1.04528	0.787958	1	1.49568	0.485294	1.51906		0.338647	1	0.641026	4.08483			Dausa	2016-17	161555	14110.3	2.60132	14520.8	8821.21	9738	2603.32	0.6653	345.291	21.9549	56839.9	0	1794.98	0.6653	16.6325	278517
	Dausa	2017-18	1.38072	3.68486	2.94	1.42924	1.60289	0.86894	0.765327		2.02857	0.444444	2.12657		0.382907		0.612903	4.30819			Dausa	2017-18	138374	13520.2	1.9951	9184.47	9680.78	7035.55	2267.34	0	519.599	10.6448	68475.3	0	1892.78	0	12.6407	259526
	Dausa	2018-19	1.73527	3.78802	2.75	1.60519	1.7427	1.06024	0.899279		2.23214	0.5	1.81408		0.423492		0.5	4.32598			Dausa	2018-19	177708	11781.8	1.24411	17573.9	12076.5	6967.02	2405.72	0	498.975	8.6489	62521.6	0	2060.43	0	20.6243	246861
	Dausa	2019-20	1.97309	3.39063	2.5	1.39746	1.8796	1.15415	0.900958		1.29817	0.538462	1.66032		0.412828		0.25	3.94278			Dausa	2019-20	203537	12467.7	0.565505	22222.4	13875.5	5897.88	2626.6	0	376.56	4.6571	58807.2	0	2081.06	0	2.6612	222536
	Jaipur	2008-09	1.54191	2.96653	2.42667	0.996541	1.88594	0.791534	0.908648		1.21325	0.630252	1.21141		0.483647		0.471572	3.10759			Jaipur	2008-09	302223	101399	17.2285	19099.5	57797.6	30928.9	24455.7	0	3386.76	29532.2	110723	0	3734.78	0	186.938	281788
	Jaipur	2009-10	0.753495	3.04078	0	0.865491	1.24645	0.259623	0.0436126		0.451327	0.0533883	1.02755		0.182693		0.0477327	3.21421			Jaipur	2009-10	159182	99944.1	0	3514.7	38847.9	9496.71	1085.17	0	1149.47	2584.65	67577.4	0	3333.72	0	13.258	296649
	Jaipur	2010-11	1.34819	3.70248	2.5725	1.8126	2.03495	0.921612	0.658262	0.857143	1.79687	0.699279	1.30635		0.354915		0.736486	3.71989			Jaipur	2010-11	295514	159893	23.1922	125568	60435.3	27052.3	17374.6	3.9774	4186.88	37406.8	112682	0	3884.59	0	144.512	391738
	Jaipur	2011-12	1.55766	2.76174	3.06511	0.8907	1.98792	0.943508	0.61929	1	1.23019	0.415559	1.0013		0.263975	1.6	0.669794	3.11574			Jaipur	2011-12	327628	111138	32.4691	61302.3	67082.2	24036.1	10666.7	1.3258	2819.98	32424.4	85917.1	0	2535.59	5.3032	236.655	305840
	Jaipur	2012-13	1.40853	2.94058	2.92358	1.59992	1.70858	0.805659	0.533246	1	0.927957	0.158008	1.13428		0.185602		0.263682	3.37726			Jaipur	2012-13	281518	122138	58.9745	109500	49698.3	29674.1	9696.9	0.6629	1502.79	6350.58	91173.9	0	1288.68	0	70.2674	338263
	Jaipur	2013-14	1.50596	2.84551	3.26667	1.2141	1.97307	1.07085	1.09405	0.888889	1.36455	0.836841	1.10966		0.293646		0.359316	3.08557			Jaipur	2013-14	302446	116201	26.5054	116080	59065.7	46757	22555.2	5.3032	2424.23	50714.5	87622.8	0	1626.76	0	125.288	314101
	Jaipur	2014-15	1.63877	3.08881	3.12828	0.726428	1.89393	1.02562	0.572533	1	1.0343	0.46866	1.02259		0.262977		0.555556	3.19017			Jaipur	2014-15	322820	123964	71.5646	57124.7	45297.9	40470	15362.7	0.6629	1259.51	23692	77619	0	1115	0	195.556	333390
	Jaipur	2015-16	1.18946	3.21947	2.72696	0.852652	1.51179	0.745071	0.451729	0.8	1.56831	0.474382	1.07189		0.151922	0.666667	0.383613	3.1734			Jaipur	2015-16	236630	119363	42.4086	8577.26	38289.8	33294.8	12081.4	5.3032	2092.78	28852.7	61633.1	0	712.617	1.3258	136.557	316283
	Jaipur	2016-17	1.6262	3.36699	3.31111	1.04908	1.81749	1.0493	0.62314	1	1.49847	0.680949	1.38934		0.329185	1	0.640638	3.62113			Jaipur	2016-17	327676	125707	33.5825	69671.5	40255.3	39221.1	15377.3	3.3145	1622.12	48123.9	90672.1	0	1122.29	3.9774	505.793	377427
	Jaipur	2017-18	1.4914	3.52995	3.23037	0.97487	1.69135	0.950685	0.385079		1.13304	0.410185	1.62832		0.338379	1	0.443565	3.63853			Jaipur	2017-18	295189	121109	69.5316	17100.8	36085.6	33225.9	8345.25	0	1202.5	33280.9	73233.9	0	963.194	0.6629	854.478	339858
	Jaipur	2018-19	1.53835	3.6578	3.24502	1.11453	2.10171	0.998318	0.896608	1.16379	1.58804	0.604484	1.42981		0.412468	1	0.723747	3.80168			Jaipur	2018-19	304090	122060	183.577	58921.2	43301.3	29910	20482.3	89.4915	1584.33	50792.7	80869.2	0	1280.72	0.6629	804.098	351607
	Jaipur	2019-20	1.88503	3.48751	3.66667	1.25623	2.24557	1.22637	1.05976		1.29716	0.685098	1.62028		0.434986	1	0.610368	3.88125			Jaipur	2019-20	377499	118148	267.759	100861	55641.8	35295.4	24147.5	0	1212.44	54101.3	102775	0	1354.97	0.6629	483.917	371889
	Karauli	2008-09	1.74123	3.06171	2.39556	1.16908	1.27899	1.20095	1.6262	1	1.73626	0.4	1.39489	1.91902	0.698549		0.30303	3.63557			Karauli	2008-09	59765.9	493.616	6.43463	4339.55	580.811	965.287	246.954	0.2926	138.692	1.7556	36084	1372.88	2267.36	0	2.926	66737.7
	Karauli	2009-10	1.85372	2.77425	2.02622	0.950367	1.15508	1.99914	0.535714	0.75	1.04651	0.0181818	1.38962	1.03059	0.596223		0.264151	3.90584			Karauli	2009-10	72498.1	485.423	14.9166	5871.6	442.411	1360.59	8.778	0.8778	52.668	0.2926	30614.4	315.423	5016.63	0	4.0964	83581.2
	Karauli	2010-11	1.90206	2.8497	2.52	1.3369	1.96631	0.517073	0.700288	0.923077	1.79221	0.633333	1.6838	1.22325	0.470124		0.745098	4.24607			Karauli	2010-11	74298.5	416.077	8.77449	6503.33	648.987	217.109	71.1018	3.5112	40.3788	5.5594	36527.3	655.717	2437.94	0	11.1188	107049
	Karauli	2011-12	1.97029	2.40616	3.07164	1.05169	1.75468	1.12433	0.73913	1	1.57851	0.516129	1.38125	1.21294	0.496585		0.516667	3.94293			Karauli	2011-12	74148.1	251.343	10.2369	5739.06	548.332	367.798	59.6904	0.5852	55.8866	4.6816	32543	526.68	3616.54	0	18.1412	86868
	Karauli	2012-13	1.85336	3.27273	2.90659	1.1897	1.00891	1.17703	0.618026	1	1.88112	0.285714	1.60882	1.43208	0.383631	2	0.565217	3.91312			Karauli	2012-13	66701.4	284.407	25.446	5879.5	265.096	1655.53	42.1344	0.2926	78.7094	1.7556	38935.4	749.641	2788.19	0.5852	7.6076	89706.8
	Karauli	2013-14	2.03349	3.04651	3.92	1.25455	1.47573	1.30844	0.615385		1.6	0.375	1.51834	1.35977	0.363417	0.833333	0.367347	3.75454			Karauli	2013-14	72533.2	306.645	0.584966	6190.83	355.802	4269.91	44.4752	0	42.1344	0.8778	36582.3	757.541	1495.19	2.926	5.2668	91641.1
	Karauli	2014-15	2.06978	2.80443	3.26667	1.09942	1.14441	1.28348	0.764045		1.74026	0.571429	1.49486	1.15872	0.526757	1	0.545455	3.62766			Karauli	2014-15	75550.8	222.376	1.46241	3345.59	215.646	1704.98	39.7936	0	39.2084	1.1704	36815.5	604.512	1874.98	0.2926	3.5112	90402.9
	Karauli	2015-16	1.81456	2.9918		0.968283	1.31631	1.25712	0.544757		1.30909	0.352941	1.45152	1.34997	0.451518	0.666667	0.4	3.53643			Karauli	2015-16	66237.6	106.799	0	777.146	196.042	2078.63	62.3238	0	21.0672	1.7556	33945.4	712.188	2880.35	2.3408	2.3408	81719.1
	Karauli	2016-17	1.94024	3.29808		1.55254	1.35098	1.27737	0.602709	1	1.5	0.5	1.80688	1.54633	0.552023	1	0.638095	4.04415			Karauli	2016-17	72325.2	200.724	0	4012.13	201.601	1382.54	78.1242	0.5852	14.9226	9.0706	42869.1	844.736	2291.35	0.5852	19.6042	105544
	Karauli	2017-18	2.08177	3.32308	3.4	1.22263	1.9521	1.31504	0.583162		2.04	0.423077	1.8644	1.30423	0.478587	1.2	0.618785	4.23729			Karauli	2017-18	79751.6	189.605	0.845614	964.117	190.775	974.651	83.0984	0	14.9226	3.2186	38660.1	568.229	2033.86	3.5112	32.7712	93509.4
	Karauli	2018-19	1.92763	3.59843		1.84147	2.05364	1.43143	0.831349		2.22222	0.5	1.9926	1.68638	0.438696	1.25	0.501462	4.44529			Karauli	2018-19	73154.7	133.718	0	4975.96	156.834	775.683	122.599	0	11.704	3.5112	48522.4	851.173	2260.34	1.463	100.362	101254
	Karauli	2019-20	2.22388	3.53191		1.69805	2.19655	1.5705	0.709328		1.3	0.563636	1.83868	1.58421	0.397792	0.666667	0.242938	4.25859			Karauli	2019-20	85525.8	97.1432	0	7235.12	186.386	635.527	95.6802	0	7.6076	9.0706	48561.9	792.653	2520.16	0.5852	12.5818	92418
	Pratapgarh	2008-09	0.833333	1.75891	1.0331	0.854033	1.0216	1.10345	1.05634	0.836523	2.22841	0.421053	1.26884	1.80719	0.292441	1.21104	0.107225	2.61441			Pratapgarh	2008-09	6.09	961.489	107.385	6269.78	230.446	23.3856	109.62	649.438	30168.4	5.8464	2527.11	673.554	57.4896	28977.2	124.723	28410.8
	Pratapgarh	2009-10	0.4	2.04638	1.53244	1.05087	1.45188	1.19444	0.804281	0.852026	1.73052	0.0526316	1.22276	1.51503	0.267753	1.56416	0.7899	3.3145			Pratapgarh	2009-10	0.9744	1128.6	143.423	6210.34	253.588	20.9496	64.0668	660.643	23664	1.218	1656.72	564.665	56.028	37908.5	689.632	38511.9
	Pratapgarh	2010-11	1	1.9508	1.21243	0.963383	1.96629	0.508772	0.698413	0.743154	1.41396	0.621723	1.55953	2.02492	0.407619	1.35133	0.453826	2.49727			Pratapgarh	2010-11	0.9744	1004.61	108.602	5261.76	383.67	7.0644	42.8736	852.844	19686.5	121.313	2121.76	653.092	104.261	33288.4	377.093	30002.5
	Pratapgarh	2011-12	1.28571	2.4644	1.85752	0.963003	1.26485	0.6	0.73913	0.996395	1.48356	0.516129	1.34213	1.88613	0.126627	1.20587	0.271827	3.47596			Pratapgarh	2011-12	2.1924	1273.3	105.924	4546.31	248.959	7.308	24.8472	1279.14	20043.7	7.7952	1722.01	536.651	26.0652	31060.2	254.075	47152.7
	Pratapgarh	2012-13	1	2.41693	0.744183	0.89153	1.04584	0.445693	0.617647	1.1443	2.79107	0.297151	1.85579	1.77065	0.234532	1.15902	0.399839	3.16737			Pratapgarh	2012-13	1.7052	1098.64	56.7361	4130.48	150.058	28.9884	10.2312	1653.56	35709.3	53.3484	4881.01	490.854	39.7068	31359.6	363.695	44934
	Pratapgarh	2013-14	1	2.59699	2.48714	1.02728	0.867102	0.566502	0.62069	0.886354	1.72807	0.383178	1.60977	2.14729	0.185345	1.12371	0.314293	3.93332			Pratapgarh	2013-14	1.7052	1134.93	84.2519	5220.35	96.9528	28.014	8.7696	1580.72	21148.1	69.9132	4031.58	589.512	20.9496	33057.5	288.179	62948.9
	Pratapgarh	2014-15	1	3.79212	3.139	1.0643	2.01699	0.589286	0.763158	1.17946	1.40226	0.5	1.52036	2.18575	0.340681	1.09966	0.261751	3.56977			Pratapgarh	2014-15	0.7308	1359.78	101.784	4399.17	231.42	16.0776	7.0644	2512	16692.2	3.4104	2800.67	590.486	41.412	32439.7	226.548	55929.8
	Pratapgarh	2015-16	1	2.36858	2.70836	1.24824	2.02439		0.55	0.824189	1.42404	0.439024	1.30376	2.02225	0.313596	0.855911	0.669511	2.77688			Pratapgarh	2015-16	0.4872	785.854	74.0248	4281.03	181.969	0	2.6796	2078.4	15608.9	4.3848	3121.98	420.697	34.8348	26777.2	649.925	38469.6
	Pratapgarh	2016-17	1	3.54844	3.31196	1.4737	2.04587	0.4	0.583333	1.2913	1.51218	0.454545	1.36264	2.28919	0.347439	1.33222	0.867543	3.79574			Pratapgarh	2016-17	1.218	1133.23	111.233	5104.15	217.291	5.3592	1.7052	3008.46	16178	1.218	3707.1	458.942	38.0016	42279	836.035	58838.7
	Pratapgarh	2017-18	0.857143	3.80694	3.23963	1.25978	1.95289	0.372093	0.666667	1.08423	1.90107	0.416667	1.50285	2.3655	0.268293	1.19409	0.644453	3.41363			Pratapgarh	2017-18	1.4616	1282.55	129.33	5390.38	353.464	3.8976	0.9744	2279.61	19547.4	1.218	3921.23	477.7	26.796	37682.2	779.764	53653.9
	Pratapgarh	2018-19	1	2.41564	3.24785	1.3421	2.05379	0.342105	1	1.24987	2.10587	0.5	1.66834	2.29104	0.347826	1.38765	1.17754	4.06993			Pratapgarh	2018-19	0.7308	767.34	109.618	8477.77	771.968	3.1668	0.2436	1798.5	21926.7	0.7308	6944.31	448.711	33.1296	43739.4	1696.43	69692
	Pratapgarh	2019-20	1	3.74809	1.02186	1.51987	0.618205	0.458333	0.5	1.34253	1.42341	0.666667	1.8171	2.18968	0.327032	0.326373	0.600884	4.01287			Pratapgarh	2019-20	0.2436	1435.29	38.7202	10306	238.241	2.6796	0.2436	1387.3	13483.7	0.4872	3903.69	413.389	42.1428	11027.3	662.348	86722.1
	Rajsamand	2008-09	0.82495	1.85159	2.39736	0.78	0.8963	0.760692	1.60909		1.25351	0.420712	0.608256	1.80952	0.192702	1	0.218696	2.23432			Rajsamand	2008-09	374.084	4951.59	3046.2	284.669	1679.73	4770.94	7853.03	0	64577.8	237.224	1317.51	173.356	428.828	0.9124	232.662	24603.8
	Rajsamand	2009-10	0.393013	1.98459	2.03209	0.606936	0.818081	0.317972	0.696882		0.993422	0.0527903	0.718557	1.5082	0.154408	0	0.0479094	2.60192			Rajsamand	2009-10	164.232	2585.74	2056.64	95.802	1345.79	1322.07	4180.62	0	54012.3	31.934	635.943	83.9408	289.231	0	50.182	15338.4
	Rajsamand	2010-11	1.10817	1.79108	3.7582	0.897608	0.994195	0.516842	1.4343		1.23071	0.621271	1.55964	2.02326	0.398144		0.764984	3.27488			Rajsamand	2010-11	458.025	13844.8	1673.58	1095.79	1718.96	1833.92	10874.9	0	71439.1	437.04	5655.06	158.758	822.072	0	885.028	95311.1
	Rajsamand	2011-12	1.25346	2.72059	4.91355	1.00967	0.929675	0.718126	1.47509		1.52085	0.508427	0.909676	1.88525	0.0391658		0.516129	3.12493			Rajsamand	2011-12	496.346	18887.6	5017.1	857.656	1592.14	1803.81	9699.72	0	85902.5	330.289	2839.39	104.926	70.2548	0	700.723	92133.2
	Rajsamand	2012-13	0.969945	2.7763	2.91993	0.648676	1.1582	0.784431	2.43746		2.05431	0.297111	0.732192	1.78049	0.216593	1.5	0.574983	3.29421			Rajsamand	2012-13	323.902	21526.3	3184.83	581.199	1850.35	3585.73	15398.6	0	110574	197.078	1716.22	66.6052	312.041	2.7372	759.117	100629
	Rajsamand	2013-14	0.932515	2.67419	3.27205	0.985782	0.801915	0.522336	1.92589		1.81806	0.383382	1.0384	2.16667	0.298258		0.360305	2.93134			Rajsamand	2013-14	277.37	18055.5	3325.28	1138.68	1222.62	2603.08	12802.8	0	97462.6	239.961	2862.2	59.306	374.996	0	430.653	82042.1
	Rajsamand	2014-15	1.08833	1.73611	3.11648	1.19137	0.755977	1.00315	2.12114		2.01575	0.515385	0.887036	2.17857	0.339775	1	0.556543	2.35527			Rajsamand	2014-15	314.778	11116.7	2834.6	931.56	980.83	4066.57	14106.6	0	108472	305.654	1941.59	55.6564	385.033	0.9124	628.644	63482.1
	Rajsamand	2015-16	0.788889	2.3939	2.59387	0.891459	0.53209	0.26412	0.889784		1.01175	0.437037	0.612796	2	0.314708	0.660714	0.383929	2.74216			Rajsamand	2015-16	259.122	14184.2	1660.82	457.112	650.541	1160.57	8566.52	0	57725.7	269.158	1013.68	38.3208	349.449	33.7588	431.565	64915.4
	Rajsamand	2016-17	0.997214	2.43166	2.62428	0.910309	2.04562	0.989988	1.08144		1.59949	0.495315	0.912839	2.27586	0.347137	1.07937	0.640829	3.25217			Rajsamand	2016-17	326.639	18035.4	1418.15	805.649	2577.53	3698.87	11049.2	0	93090.3	337.588	1414.22	60.2184	359.486	62.0432	761.854	96312
	Rajsamand	2017-18	0.88254	2.70476	3.56317	1.07386	1.95362	0.788775	1.79023		2.34032	0.431579	0.822327	2.35484	0.269231	1.20513	0.62377	3.2743			Rajsamand	2017-18	253.647	18572.8	2362.14	1326.63	2267.31	2603.08	16414.1	0	135614	299.267	954.37	66.6052	255.472	214.414	694.336	102551
	Rajsamand	2018-19	0.890805	2.57648	4.11543	1.15234	2.05333	1.14173	2.44825		2.08963	0.495763	1.01449	2.28	0.348148	1.25424	0.500427	2.96619			Rajsamand	2018-19	282.844	13371.2	2892.3	1504.55	2248.15	3439.75	21886.7	0	120096	320.252	958.02	52.0068	300.18	472.623	534.666	60836.1
	Rajsamand	2019-20	1.18692	2.88973	1.46199	1.86924	2.19649	1.01374	1.61942		1.74369	0.56	1.36977	2.19231	0.327014	0.469345	0.245961	3.42061			Rajsamand	2019-20	347.624	18506.2	1052.87	3665.11	2396.87	2423.33	13894.9	0	100988	332.114	1166.05	52.0068	251.822	202.553	249.998	103391
	Sawai Madhopur	2008-09	1.57352	1.96761		1.24408	1.09422	0.501245	1.62543	0.882353	1.73737	0.421488	1.04092	1.8125	0.403246	1.34134	0.430624	3.07577			Sawai Madhopur	2008-09	79003.8	1854.82	0	10107.6	5593.46	1229.68	3219.6	11.4495	1050.3	77.8566	138180	88.5428	12042.6	1406.76	938.096	125487
	Sawai Madhopur	2009-10	1.25305	1.97473	2.94	1.04416	0.872602	0.353191	1.53645	0.897436	1.0449	0.0588235	1.10918	1.51456	0.336218	1.09717	0.279481	3.48394			Sawai Madhopur	2009-10	81099.9	2206.7	0.762995	21385.4	4166.85	316.769	3668.42	26.7155	586.214	4.5798	134135	119.075	15746.1	620.563	410.655	162709
	Sawai Madhopur	2010-11	1.86735	2.84958		1.45484	1.53432	0.516514	0.699794	0.872449	1.79664	0.618812	1.45845	2.02477	0.341881	1.46056	0.432612	3.4608			Sawai Madhopur	2010-11	127191	3904.28	0	21355.6	6433.09	561.025	1037.32	522.097	735.058	95.4125	168855	998.396	8487.13	876.268	595.374	222401
	Sawai Madhopur	2011-12	1.70547	2.8386	3.09474	1.27197	1.35502	0.997872	1.76013	1.12414	1.57997	0.507508	1.14116	1.88562	0.360252	1.12255	0.684155	3.28559			Sawai Madhopur	2011-12	95027.8	2604.38	7.62995	13986.7	8154.33	715.975	828.944	124.418	746.507	128.998	149092	880.848	8124.57	2537.97	3473.78	175866
	Sawai Madhopur	2012-13	1.69791	3.1103	2.8224	1.35168	1.3483	1.07077	2.04324	1.09615	1.88401	0.297101	1.31094	1.77069	0.45661	1.16323	0.527847	3.28427			Sawai Madhopur	2012-13	86376.6	2604.38	9.15594	17077.3	5752.99	3799.71	1154.11	43.5081	818.258	31.2953	181430	571.712	11727.3	3448.59	2105.18	175490
	Sawai Madhopur	2013-14	1.63193	3.04598	3.92	1.41086	1.53913	1.12946	0.614815	0.846154	1.59671	0.387755	1.04442	2.14681	0.4711	1.31138	0.343111	2.82861			Sawai Madhopur	2013-14	77148.3	2022.74	1.52599	14552.3	6936.11	11867	316.769	75.5667	592.321	29.0054	146900	770.17	6905.58	8997.78	1294.56	166687
	Sawai Madhopur	2014-15	1.74695	2.80263	2.94	1.43822	1.51033	1.02608	0.764211	0.81592	1.74046	0.514523	1.23456	2.1859	0.497007	1.42834	0.452203	3.29771			Sawai Madhopur	2014-15	78769.5	1463.25	0.762995	10013	4016.48	3243.26	277.078	125.181	522.097	94.6492	174339	1822	5957.56	7287.23	1245.71	207053
	Sawai Madhopur	2015-16	1.58081	2.99394	5.88	0.985749	1.23304	1.03099	0.54522	0.858696	1.31264	0.4375	0.935302	2.02184	0.518834	1.03977	0.457728	3.32526			Sawai Madhopur	2015-16	73211.2	1131.21	0.762995	9345.08	2996.72	4900.39	161.056	844.21	435.844	64.1172	119979	3250.13	15865.2	8401.64	3293.64	175928
	Sawai Madhopur	2016-17	1.72274	3.2974		1.80152	1.32623	0.913276	0.603905	1.07146	1.49885	0.495935	1.66054	2.21691	0.464523	1.45813	0.718895	4.10228			Sawai Madhopur	2016-17	88342.1	1354.09	0	21712.8	3276.85	2741.01	330.509	1922.75	497.672	139.684	206530	2761.62	9869.47	12307.4	16512.5	267213
	Sawai Madhopur	2017-18	1.54893	3.3236	3.66667	1.58499	1.05895	0.640892	0.583483	1.13889	2.02786	0.430769	1.7175	2.27726	0.386655	1.10602	0.344626	3.9165			Sawai Madhopur	2017-18	74957.6	1128.92	1.42737	44933.9	1864.74	1031.22	248.072	125.181	555.682	42.7448	130437	2407.45	7536.82	4252.34	19055	192142
	Sawai Madhopur	2018-19	1.53511	3.59796		1.91875	1.32988	0.91215	0.832727	1.29091	2.23226	0.495652	1.89306	2.83605	0.399651	1.35354	0.543697	4.2779			Sawai Madhopur	2018-19	76294.9	1345.7	0	50992.3	2446.38	1117.47	349.591	54.1943	528.204	130.524	229630	3314.25	8739.78	1738.8	29280.2	229163
	Sawai Madhopur	2019-20	1.92186	3.52673		2.0798	1.48653	1.14232	0.709419	1.70122	1.29615	0.556701	1.871	2.90406	0.378936	1.23561	0.419389	4.37341			Sawai Madhopur	2019-20	103143	1359.44	0	68671	2695.98	698.419	270.208	212.961	257.232	82.4364	214176	4805.74	9765.66	1425.08	19722.9	246808
	Tonk	2008-09	1.3932	2.26567	2.42118	0.761032	1.10633	0.801016	0.453583	0.864198	1.07016	0.299747	0.920593		0.381921	0.973856	0.460101	2.60593			Tonk	2008-09	70055.2	11490.2	32.8938	16668.8	16415	4004.31	26652.8	65.814	13438.3	12012.9	208094	0	17057.1	140.09	3773.02	99579.4
	Tonk	2009-10	0.528503	1.97844	2.02667	0.502034	0.55821	0.325258	0.0309064	0.893918	0.257759	0.0473913	0.768865	1.57143	0.0925008	1.17442	0.0984645	2.67327			Tonk	2009-10	33672.3	8802.15	142.853	5220.93	7798.96	1186.53	2330.76	594.206	3380.96	1518.42	125562	10.3422	6333.19	94.9602	482.323	100350
	Tonk	2010-11	1.54482	2.6946	2.53813	0.671259	1.48645	0.516643	0.570609	0.872443	1.22689	0.673548	1.5319	2	0.382774	1.46269	0.706845	3.20987			Tonk	2010-11	103221	42929.5	56.3894	44387.8	18510.7	1342.61	43669.5	3408.22	15048.8	27026	261131	3.7608	15062.9	92.1396	3980.81	267484
	Tonk	2011-12	1.27765	2.65581	3.05113	1.02474	1.19309	0.824926	0.448076	1.12611	0.997449	0.383843	1.33094		0.298274	1.54762	0.496533	3.4608			Tonk	2011-12	57607	22685.1	425.74	57666.2	19978.3	2091	20973	831.137	11765.7	28153.3	299435	0	10673.2	183.339	14069.2	219410
	Tonk	2012-13	1.26472	2.73587	2.92088	1.20267	1.05619	0.663068	0.57076	1.2069	1.14721	0.327069	1.44793		0.236228	1.41463	0.641601	3.41948			Tonk	2012-13	49828.7	19935.1	789.452	66238	13360.2	4388.85	26728.9	263.256	11532.5	13122.4	362773	0	6438.49	163.595	12041.1	198587
	Tonk	2013-14	1.31012	2.64008	3.27389	1.15434	1.04343	0.756529	0.283888	0.850746	0.99021	0.300782	1.46867		0.175141	0.829559	0.291909	3.42389			Tonk	2013-14	50205.7	15220.9	520.662	63961.8	17030.8	10786	15154.1	160.774	9984.92	14323	388624	0	2477.43	654.379	6702.69	188049
	Tonk	2014-15	1.45744	1.74463	3.13679	0.761295	1.12049	0.7661	0.675111	0.646667	1.0963	0.427226	0.937213	2.16667	0.192079	1.0365	0.527892	2.09048			Tonk	2014-15	57424.6	8555.82	749.04	35661.8	9346.53	3008.64	32822.4	273.598	9311.74	15355.3	263522	12.2226	1641.59	400.525	8416.67	130460
	Tonk	2015-16	1.11128	2.62299	2.71346	1.24316	0.636546	0.581751	0.46398	0.849381	0.989018	0.475416	1.23628	2	0.358727	0.667732	0.549317	3.12759			Tonk	2015-16	47001.5	9183.87	506.565	18501.3	9265.67	4148.16	26558.8	2836.58	8298.21	22581.7	291647	9.402	3572.76	393.004	13980.8	151345
	Tonk	2016-17	1.45871	2.92096	3.96021	0.984025	1.20228	0.836401	0.433015	1.01791	1.048	0.718868	1.67748	2	0.347667	0.956522	0.554973	3.62574			Tonk	2016-17	61226.8	14349.3	493.088	45230.2	11992.3	4186.71	25168.2	7212.27	8580.27	45118.3	385171	1.8804	3671.48	517.11	34829.7	235843
	Tonk	2017-18	1.52754	2.60735	4.48137	1.06495	0.968956	0.846841	0.507944	1.05573	4.39604	0.681967	1.59002	2.5	0.436939	1.2069	0.593855	3.3326			Tonk	2017-18	60043.1	9933.21	691.921	101500	10652.5	3566.18	25039.4	1300.3	30254.7	47158.6	279016	4.701	3022.74	131.628	64145.1	143637
	Tonk	2018-19	1.44149	2.63549	3.24936	1.37543	1.31527	0.998357	0.830465	1.16397	1.48225	0.676432	1.64734	2	0.501812	1.26087	0.603793	3.58462			Tonk	2018-19	58912.9	6940.56	406.138	99988.4	19027.8	3427.03	43559.5	473.861	8441.12	54421.6	418383	3.7608	4816.64	54.5316	63852.7	135279
	Tonk	2019-20	1.30866	3.28688	3.67	1.74136	1.44087	0.716256	0.662698	1.6994	1.04203	0.458647	1.71742		0.281732	0.466667	0.294904	3.82988			Tonk	2019-20	63325.3	15167.3	293.295	146815	24527	1367.05	44069.1	536.854	6783.54	30881.8	456069	0	6794.83	39.4884	23615	216026
	Udaipur	2008-09	0.818182	1.72201	2.39855	0.930766	0.848628	0.781396	0.675848		1.37553	0.42381	0.818416	0.545676	0.254298	1.0211	0.227821	2.10738			Udaipur	2008-09	3.6774	3801.61	96.7995	3565.03	1390.47	4314.41	1944.94	0	97578.2	36.3654	5196.98	822.512	290.106	652.534	663.158	35403.1
	Udaipur	2009-10	0.397436	1.80751	2.03	1.06674	0.657067	0.369065	0.315628		0.939229	0.0478261	0.891236	0.609922	0.160395	0.601942	0.204582	2.34049			Udaipur	2009-10	12.6666	3226.71	106.602	1998.46	913.63	1946.98	1010.06	0	68795.2	4.4946	3137.23	1059.91	172.429	430.664	518.105	30794.5
	Udaipur	2010-11	1.09091	1.70248	2.55022	1.34481	0.632025	1.01935	0.601578		1.3684	0.62234	1.5596	1.07949	0.226263	1.4606	0.538897	2.39425			Udaipur	2010-11	9.8064	5237.43	172.36	6130.63	822.512	4951.41	1837.88	0	100296	47.8062	11178.1	2152.91	241.483	1075.44	1593.54	53921.3
	Udaipur	2011-12	1.26667	2.50777	3.04761	1.14389	1.13504	0.738706	0.562141		1.59088	0.507519	1.00129	1.04415	0.228144	1.51116	0.353493	2.80034			Udaipur	2011-12	7.7634	10025.4	613.063	4469.68	1305.07	3187.08	1600.49	0	116204	55.161	5697.11	2319.21	243.117	1189.84	1062.77	82324.3
	Udaipur	2012-13	1	2.05613	2.92043	1.02696	0.865016	0.681172	0.621069		1.87338	0.297872	1.01518	1.03524	0.234573	0.896552	0.462124	2.45627			Udaipur	2012-13	3.2688	8217.35	640.02	3533.16	1013.33	3191.57	1823.58	0	134427	28.602	5436.83	1992.33	234.536	1094.23	1313.65	72942
	Udaipur	2013-14	0.932099	2.39408	2.68794	1.12689	0.867141	0.949176	0.577343		1.70542	0.383784	1.04803	1.14649	0.185552	1.31734	0.350175	2.83953			Udaipur	2013-14	61.6986	9028.02	492.166	5541.02	946.726	5387.39	1686.7	0	120559	29.0106	6401.13	2286.53	160.58	1704.68	982.683	82048.1
	Udaipur	2014-15	1.125	2.20974	3.13801	0.99568	1.01021	0.780273	0.558094		1.57468	0.512077	0.886976	1.07539	0.340032	1.10322	0.303113	2.51552			Udaipur	2014-15	3.6774	8730.15	553.432	3955.25	970.016	3946.67	1627.05	0	108711	43.3116	4146.06	2133.3	262.73	3118.03	950.812	78988.5
	Udaipur	2015-16	0.8	2.54822	2.71293	1.09294	0.476447	0.561557	0.417194		1.11938	0.435897	0.793752	0.95871	0.0935583	0.580133	0.315203	2.81789			Udaipur	2015-16	8.172	10320.4	278.145	3896.82	396.751	3377.08	1346.34	0	79360.3	34.731	3571.16	1906.94	74.7738	3018.74	1086.88	86149.2
	Udaipur	2016-17	1	2.5377	2.0397	1.36845	0.882958	0.51088	0.459051		1.21533	0.496774	0.986043	1.12829	0.347407	0.951876	0.412843	3.12119			Udaipur	2016-17	8.5806	10108.8	167.751	5068.68	561.008	2772.35	1351.24	0	85530.2	31.4622	4012.45	2242.4	235.354	5649.3	1408.04	102548
	Udaipur	2017-18	0.894737	2.37882	2.00488	1.2028	0.76762	0.731001	0.662687		1.33419	0.434483	0.939869	1.14129	0.269634	0.91082	0.431938	2.83997			Udaipur	2017-18	13.8924	9152.23	171.154	4594.71	449.46	3612.02	1542.06	0	88900.3	25.7418	2937.83	2425.86	168.343	7198.71	1437.86	93920.4
	Udaipur	2018-19	0.888889	2.41608	3.24738	1.31968	0.925074	1.14578	0.53174		1.96644	0.494382	0.892385	0.997414	0.348306	1.23559	0.710306	2.91156			Udaipur	2018-19	13.0752	8363.63	322.79	4950.6	509.524	4842.73	927.522	0	127633	35.9568	2259.97	1891.41	193.268	12215.1	2188.05	88978.4
	Udaipur	2019-20	1.18	2.77218	3.66564	1.37924	0.65312	0.384264	0.287753		1.01815	0.561905	0.710716	1.00618	0.327245	0.540397	0.442749	3.15511			Udaipur	2019-20	24.1074	10277.1	414.271	6150.66	367.74	1410.9	593.287	0	66696.2	24.1074	1650.34	1929	175.698	7187.68	1387.2	107257
[truncated: 9 more columns]

## Sheet: LU_wise_WF (m3_per_year)
		Bajra						Barley						Cotton						Gram						Groundnut						Guar						Jowar/Sorghum						Lentil/Masoor
		Rainfed		Irrigated				Rainfed		Irrigated				Rainfed		Irrigated				Rainfed		Irrigated				Rainfed		Irrigated				Rainfed		Irrigated				Rainfed		Irrigated				Rainfed		Irrigated
		Wfgreen (m³/ton)	WFgrey	WFblue	WFgreen	WFgrey	WFtotal (m³/ton)	Wfgreen (m³/ton)	WFgrey	WFblue	WFgreen	WFgrey	WFtotal (m³/ton)	Wfgreen (m³/ton)	WFgrey	WFblue	WFgreen	WFgrey	WFtotal (m³/ton)	Wfgreen (m³/ton)	WFgrey	WFblue	WFgreen	WFgrey	WFtotal (m³/ton)	Wfgreen (m³/ton)	WFgrey	WFblue	WFgreen	WFgrey	WFtotal (m³/ton)	Wfgreen (m³/ton)	WFgrey	WFblue	WFgreen	WFgrey	WFtotal (m³/ton)	Wfgreen (m³/ton)	WFgrey	WFblue	WFgreen	WFgrey	WFtotal (m³/ton)	Wfgreen (m³/ton)	WFgrey	WFblue	WFgreen	WFgrey	WFtotal (m³/ton)
	LU1	4170.9	140.787	1567.6	3156.61	132.454	4856.66	1020.15	63.7164	749.629	560.835	58.147	1368.61	2476.02	55.8888	1680.2	1817.03	56.1742	3553.41	2181.19	168.261	1184.29	1785.35	165.879	3135.52	5537.06	140.232	2780.1	3365.92	121.944	6267.97	5758.79	200.899	1850.69	4687.61	189.886	6728.18	6060.5	189.813	2486.94	5184.78	183.365	7855.09	4067.02	191.621	2817.85	2392.5	185.69	5396.04
	LU2	6162.84	181.243	1558.54	3107.89	131.623	4798.05	1075.06	73.1453	811.891	538.189	57.9024	1407.98	2583.99	60.8319	1791.11	1764.19	55.7318	3611.03	2271.18	179.339	1319.21	1729.13	161.285	3209.62	5764.55	163.132	2723.95	3377.71	121.072	6222.74	5745.05	204.869	1907.23	4520.91	188.776	6616.92	5845.13	191.256	2613.97	4972.24	182.194	7768.4	4151.03	190.924	3161.51	2316.85	181.442	5659.8
	LU3	4439.53	169.22	1063.37	2971.78	135.961	4171.11	1105.73	66.3467	814.201	591.292	58.494	1463.99	2288.54	60.255	1396.26	1739.38	57.637	3193.27	2235.86	154.194	1232.82	1702.88	145.166	3080.87	5243.05	159.97	2063.81	3276.51	125.056	5465.38	5143.13	205.252	1290.51	4366.89	194.999	5852.4	5282.05	190.797	1836.85	4798.81	188.286	6823.94	4067.02	196.8	2817.85	2392.5	190.708	5401.06
	LU4	4245.32	147.984	1540.54	3239.17	138.255	4917.97	1075.6	68.3214	817.651	611.806	60.5448	1490	2546.63	60.5853	1712.87	1861.65	58.6347	3633.16	2261.82	166.05	1292.37	1862.91	160.377	3315.66	5654.18	148.322	2725.19	3479.11	127.266	6331.57	5778.82	211.059	1768.24	4747.66	198.281	6714.19	6116.39	202.687	2459.29	5320.54	191.49	7971.32	4244.14	190.963	3093.58	2549.4	183.58	5826.56
	LU5	4259.99	354.834	1252.94	3251.55	318.018	4822.51	1063.05	174.658	811.629	533.208	138.611	1483.45	2604.56	145.672	1656.64	1831.11	134.667	3622.41	2135.17	394.963	1275.61	1615.26	356.872	3247.74	5579.56	372.805	2429.92	3487.39	292.492	6209.8	5587.93	480.814	1554.28	4636.82	456.109	6647.21	5878.75	452.957	2236.13	5115.28	440.245	7791.65	3883.91	425.296	2998.28	2102.62	402.438	5503.34
	LU6	4367.64	387.968	1307.59	3294.25	341.832	4943.67	1028.54	169.457	769.003	575.647	149.718	1494.37	2557.66	150.9	1623.31	1894.76	144.888	3662.96	2179.85	419.66	1199.05	1754.27	399.885	3353.21	5731.86	396.677	2482.14	3568.74	314.45	6365.33	5705.16	517.252	1631.24	4690.69	490.231	6812.16	5938.32	484.184	2295.23	5267.77	473.31	8036.31	4011.36	469.122	2902.77	2363.14	450.624	5716.53
	LU7	5249.9	376.021	993.416	3104.79	313.288	4411.49	1081.14	155.785	820.026	577.792	134.4	1532.22	2415.69	140.956	1398.68	1822.74	132.757	3354.18	2182.32	364.646	1252.47	1700.82	341.626	3294.92	4936.55	334.855	2024.31	3409.78	288.142	5722.23	5154.14	458.727	1217.74	4484.53	449.325	6151.59	5496.09	437.197	1705.62	5030.56	433.857	7170.04	3794.78	393.539	2859.72	2184.3	375.033	5419.06
	LU8	5829.6	796.738	1365.53	3203.46	631.671	5200.66	1016.44	340.798	759	529.035	277.118	1565.15	2574.03	296.308	1722.41	1782.49	267.486	3772.38	2171.82	816.873	1227.55	1684.8	755.685	3668.03	6232.8	785.088	2568.43	3365.09	581.005	6514.53	5793.16	992.429	1677.24	4566.24	905.958	7149.44	5937.28	924.375	2420.9	4981.93	874.287	8277.12	3877.53	871.081	2889.68	2162.37	830.58	5882.63
	LU9	4523.77	627.627	1115.27	3199.26	539.98	4854.52	1137.23	301.067	869.927	548.415	234.615	1652.96	2568.61	252.298	1594.46	1801.92	228.678	3625.06	2254.35	674.639	1341.31	1647.05	592.301	3580.66	5569.36	646.712	2230.96	3465.1	496.668	6192.73	5387.61	804.755	1399.71	4567.24	774.452	6741.4	5717.42	763.032	1998.31	5099.37	747.722	7845.4	4008.17	704.353	3137.73	2104.76	667.543	5910.03
	LU10	4205.58	544.909	1119.22	3210.63	489.204	4819.05	1091.24	263.245	810.951	541.525	212.418	1564.89	2581.35	228.851	1589.73	1800.77	207.204	3597.7	2178.77	603.681	1248.47	1613.07	546.122	3407.67	5448.13	564.38	2181.2	3481.92	449.938	6113.07	5388.27	725.989	1367.26	4576.4	701.628	6645.29	5716.22	690.828	1981.5	5117.56	677.474	7776.53	3853.37	642.409	2967.97	2094.98	611.15	5674.09
	LU11	4154.26	594.526	1061.46	3262.58	541.772	4865.82	1060.26	268.071	778.921	582.544	235.244	1596.71	2594.73	248.527	1495.44	1914.74	229.598	3639.78	2175.33	640.094	1179.93	1704.91	604.805	3489.65	5292.16	597.753	2095.23	3602.67	498.377	6196.28	5396.34	792.74	1216.79	4735.05	777.021	6728.86	5793.97	760.634	1868.97	5273.99	750.41	7893.37	3902.33	706.935	2819.29	2244.18	676.765	5740.24
	LU12	4531.48	564.45	1310.65	3275.35	485.17	5071.17	1010.77	266.218	745.137	526.01	212.802	1483.95	2590.11	223.454	1685.47	1787.33	205.406	3678.21	2132.05	648.445	1208.44	1702.43	597.585	3508.45	5946.14	602.269	2501.72	3469.45	446.197	6417.37	5715.46	744.482	1704.77	4628.62	695.796	7029.18	6111.39	721.592	2363.53	5119.45	671.657	8154.64	3832.89	688.445	2815.33	2206.1	656.081	5677.51
	LU13	4484.69	306.567	1466.24	3509.48	290.971	5266.69	1017.92	139.284	711.134	592.509	127.234	1430.88	2688.97	123.67	1604.1	2033.7	123.335	3761.13	2164.78	371.231	1112.49	1839.43	366.351	3318.27	5988.99	307.342	2563.88	3842.29	267.85	6674.02	6074.92	442.086	1749.04	5031.2	417.135	7197.38	6412.11	408.184	2291.5	5743.63	402.773	8437.9	3975.35	419.052	2639.34	2515.81	407.386	5562.54
	LU14	4163.82	309.232	1294.55	3342.59	298.972	4936.11	973.058	142.728	715.61	545.272	131.684	1392.57	2561.89	127.444	1493.49	1896.72	126.819	3517.03	2108.63	389.689	1129.18	1763.89	387.373	3280.45	5521.63	303.226	2441.45	3600.63	275.15	6317.22	5757.33	448.189	1645.53	4746.22	428.703	6820.46	6077.19	417.439	2190.09	5369.61	413.903	7973.6	4029.22	456.331	2742.07	2473.35	444.951	5660.37
	LU15	4662.56	334.323	1475.25	3226.4	278.413	4980.07	1053.01	152.857	787.647	533.356	122.174	1443.18	2626.59	127.363	1768.61	1782.3	117.856	3668.77	2244.9	384.499	1280.03	1737.16	346.634	3363.82	6318.95	375.401	2688	3444.9	256.113	6389.01	5871.31	433.347	1845.63	4629.5	399.307	6874.44	6159.42	411.386	2613.95	5033.11	385.419	8032.48	3990.43	404.474	2989.77	2279.07	383.127	5651.96
	LU16	4238.42	309.429	1278.18	3417.58	297.003	4992.76	983.575	147.638	726.401	581.944	130.877	1439.22	2587.21	129.891	1545.45	1946.26	125.88	3617.59	2152.53	392.896	1164.4	1887.86	384.873	3437.13	5691.25	311.001	2479.47	3679.15	273.292	6431.91	5830.18	449.917	1645.02	4841.69	425.896	6912.61	6171.68	422.913	2193.94	5466.37	411.12	8071.43	4107.64	457.005	2836.21	2649.86	442.081	5928.15
	LU17	4662.56	338.711	1475.25	3226.4	282.067	4983.72	1053.01	154.863	787.647	533.356	123.777	1444.78	2626.59	129.035	1768.61	1782.3	119.403	3670.32	2244.9	389.545	1280.03	1737.16	351.184	3368.37	6318.95	380.328	2688	3444.9	259.474	6392.37	5871.31	439.034	1845.63	4629.5	404.548	6879.68	6159.42	416.785	2613.95	5033.11	390.477	8037.54	3990.43	409.782	2989.77	2279.07	388.156	5656.99
	LU18	4345.85	584.316	1296.7	3382.39	539.602	5218.69	948.617	260.033	655.597	562.812	236.134	1454.54	2600.71	234.063	1589.74	1964.49	228.624	3782.85	2030.3	661.247	1053.7	1736.12	648.928	3438.75	5724.03	569.075	2395.18	3735.93	496.583	6627.7	5832.89	818.242	1484.63	4910.04	773.777	7168.45	6228.98	765.747	2183.58	5520.03	747.068	8450.68	3716.01	741.201	2516.87	2348.14	717.228	5582.23
	LU19	4397.11	600.634	1435.4	3238.88	515.623	5189.9	978.163	286.214	727.054	507.696	225.661	1460.41	2618.54	234.885	1731.88	1762.27	218.271	3712.41	2049.24	675.451	1185.16	1612.21	620.257	3417.63	8146.84	667.087	2603.59	3484.2	474.323	6562.11	5811.8	799.913	1861.56	4555.75	739.519	7156.83	6321.32	770.057	2512.93	5099.62	713.666	8326.22	3683.94	716.501	2757.65	2105.31	685.539	5548.49
	LU20	4565.52	589.852	1185.36	3428.07	524.771	5138.2	976.415	258.773	693.628	590.163	233.606	1517.4	2610.37	236.453	1569.1	1978.29	222.418	3769.81	2094.65	652.44	1114.53	1790.65	632.474	3537.65	5848.14	602.042	2327.65	3755.55	482.797	6566	5724.47	791.1	1407.61	4903.24	752.71	7063.55	6245.7	741.609	2023.19	5606.54	726.594	8356.32	3844.45	725.86	2681.83	2440.49	696.531	5818.85
	LU21	4475.72	589.573	1221.85	3310.11	521.27	5053.23	983.325	277.66	710.844	525.656	228.405	1464.91	2604.63	237.084	1591.43	1860.31	220.729	3672.47	2073.22	676.72	1146.04	1636.46	628.255	3410.75	5634.99	601.742	2340.54	3565.24	479.488	6385.26	5702.79	799.603	1567.19	4655.12	747.617	6969.93	6155.76	752.784	2177.07	5260.48	721.813	8159.36	3769.61	726.158	2716.34	2175.36	691.884	5583.59
	LU22	4461.25	423.819	988.284	3249.63	371.366	4609.28	1165.64	200.129	882.912	551.584	159.416	1593.91	2578.19	172.978	1458.02	1875.12	157.262	3490.4	2280.15	444.24	1362.38	1626.35	393.465	3382.19	5360.72	414.481	1976.66	3577.65	341.537	5895.85	5353.32	545.732	1231.23	4613.4	532.622	6377.26	5784.55	524.177	1793.98	5172.09	514.191	7480.26	3914.35	459.36	3039.61	2009.82	434.025	5483.45
	LU23	3461.1	361.106	881.869	2668.67	323.687	3874.23	997.899	156.789	725.504	578.619	139.69	1443.81	2131.77	141.797	1235.71	1657.8	137.241	3030.76	2011.22	356.219	1084.15	1626.97	343.408	3054.53	4374.21	323.838	1741.22	3052.87	297.724	5091.81	4407.45	471.841	943.107	3918.75	464.24	5326.09	4795.38	452.338	1434.68	4495.27	448.423	6378.38	3580.38	399.891	2533.26	2151.19	383.878	5068.33
	LU24	4021.91	415.068	1004.94	2579.86	324.909	3909.71	1047.41	178.462	786.428	525.328	140.121	1451.88	2104.46	145.848	1321.7	1539.22	137.6	2998.51	2063.08	386.576	1203.23	1522.88	344.704	3070.82	4955.31	408.103	1882.88	2908.64	298.775	5090.29	4380.26	481.08	1160.35	3740.87	465.992	5367.21	4677.93	458.088	1735.85	4209.21	449.908	6394.96	3598.27	409.401	2760.98	1950.56	385.327	5096.87
	LU25	4376.51	552.735	1299.36	3236.82	472.082	5008.26	992.024	254.999	723.496	521.664	206.798	1451.96	2557.24	216.949	1667.7	1797.19	199.901	3664.79	2109.05	615.839	1193.78	1670.73	575.099	3439.62	5855.94	577.907	2431.28	3480.93	434.216	6346.43	5730.88	728.31	1591.1	4626.64	677.071	6894.81	6080.56	697.415	2234.48	5152.13	653.642	8040.25	3789.68	653.462	2756.03	2149.17	623.024	5528.22
	LU26	4565.52	530.298	1185.36	3428.07	471.787	5085.22	976.415	232.646	693.628	590.163	210.02	1493.81	2610.37	212.58	1569.1	1978.29	199.962	3747.35	2094.65	586.566	1114.53	1790.65	568.617	3473.79	5848.14	541.257	2327.65	3755.55	434.051	6517.25	5724.47	711.227	1407.61	4903.24	676.713	6987.56	6245.7	666.733	2023.19	5606.54	653.234	8282.96	3844.45	652.573	2681.83	2440.49	626.206	5748.53
	LU27	4760.93	538.179	983.467	3603.53	471.787	5058.78	1010.44	230.508	719.915	592.9	207.612	1520.43	2738.89	213.404	1445.09	2100.53	199.939	3745.56	2058.6	550.065	1123.16	1713.12	528.246	3364.52	5779	515.097	2038.71	4008.93	433.972	6481.6	5875.14	708.67	1187.23	5003.66	676.648	6867.53	6436.84	663.803	1848.82	5782.53	653.234	8284.58	3740.77	613.699	2684.13	2323.05	586.663	5593.85
	LU28	4397.11	549.421	1435.4	3238.88	471.659	5145.94	978.163	261.81	727.054	507.696	206.42	1441.17	2618.54	214.858	1731.88	1762.27	199.66	3693.8	2049.24	617.859	1185.16	1612.21	567.371	3364.74	8146.84	610.208	2603.59	3484.2	433.88	6521.67	5811.8	731.708	1861.56	4555.75	676.464	7093.77	6321.32	704.398	2512.93	5099.62	652.816	8265.37	3683.94	655.408	2757.65	2105.31	627.086	5490.04
	LU29	4175.81	520.661	1221.08	3378.94	491.826	5091.85	980.868	238.677	700.359	585.451	215.729	1501.54	2553.56	218.94	1588.62	1918.6	208.376	3715.6	2113.12	620.08	1111.49	1812.09	605.662	3529.24	5544.71	503.852	2343.56	3672.66	452.533	6468.75	5697.04	735.124	1437.61	4873.35	705.268	7016.23	6039.65	691.554	2069.42	5467.93	680.923	8218.28	3838.26	686.994	2615.56	2427.85	664.948	5708.36
	LU30	4653.78	331.909	1455.38	3174.72	284.345	4914.44	1035.68	156.244	773.308	529.137	124.693	1427.14	2596.91	131.796	1776	1770.65	120.398	3667.05	2202.6	377.846	1246.86	1702.07	345.946	3294.88	6066.7	359.644	2665.98	3367.93	261.522	6295.43	5801.74	441.255	1825.2	4566.32	407.814	6799.34	5992.61	415.7	2524.2	5063.95	393.702	7981.84	3875.2	398.173	2925.99	2186	376.914	5488.91
	LU31	4161.13	347.286	1130.83	2965.27	298.189	4394.29	1054.53	147.618	789.131	585.122	129.552	1503.8	2346.6	131.442	1485.06	1730.06	126.38	3341.5	2192.81	372.55	1206.83	1766.82	355.825	3329.47	5289.42	353.917	2203.5	3242.49	274.254	5720.24	5178.82	452.516	1434.91	4325.17	427.669	6187.75	5375.57	422.235	1923.81	4826.17	413.022	7163	3989.57	409.441	2862.47	2354.59	390.72	5607.77
	LU32	4003.6	518.755	1091.34	3292.17	504.101	4887.61	1209.42	242.858	935.072	638.02	213.736	1786.83	2554.69	222.039	1441.91	1933	213.76	3588.67	2458.97	539.033	1444.93	1829.92	503.165	3778.01	5420.26	513.556	2144.81	3650.71	463.837	6259.36	5428.92	737.404	1264.56	4734.2	723.062	6721.82	5914.71	703.674	1852.24	5375.31	698.232	7925.78	4042.14	588.927	3098.96	2239.91	558.483	5897.36
	LU33	4282.08	570.708	1155.57	3075.39	488.393	4719.35	1185.21	264.264	910.738	562.967	212.784	1686.49	2494.34	222.818	1486.21	1781.89	206.807	3474.91	2356.95	626.684	1425.09	1701.77	540.404	3667.26	5283.8	563.444	2162	3366.2	449.191	5977.39	5236.71	728.883	1373.55	4479.68	700.464	6553.7	5598.5	684.797	1970.02	4953.61	676.163	7599.79	4233.53	655.182	3326.98	2215.86	616.794	6159.63
[truncated: 48 more columns]
